# Supplementary material
Source: publisher figshare collection journal article supplement (https://acs.figshare.com/ndownloader/files/8560579)
Supplement: Supplementary file 1 [file 8560579]

 
data_LJ-327160613 
  
_audit_creation_method            SHELXL-2013 
_chemical_name_systematic 
; 
 ? 
; 
_chemical_name_common             ? 
_chemical_melting_point           ? 
_chemical_formula_moiety          ? 
_chemical_formula_sum 
 'C21 H18 O4 S' 
_chemical_formula_weight          366.41 
  
loop_ 
 _atom_type_symbol 
 _atom_type_description 
 _atom_type_scat_dispersion_real 
 _atom_type_scat_dispersion_imag 
 _atom_type_scat_source 
 'C'  'C'   0.0033   0.0016 
 'International Tables Vol C Tables 4.2.6.8 and 6.1.1.4' 
 'H'  'H'   0.0000   0.0000 
 'International Tables Vol C Tables 4.2.6.8 and 6.1.1.4' 
 'O'  'O'   0.0106   0.0060 
 'International Tables Vol C Tables 4.2.6.8 and 6.1.1.4' 
 'S'  'S'   0.1246   0.1234 
 'International Tables Vol C Tables 4.2.6.8 and 6.1.1.4' 
  
_space_group_crystal_system       triclinic 
_space_group_IT_number            2 
_space_group_name_H-M_alt         'P -1' 
_space_group_name_Hall            '-P 1' 
  
_shelx_space_group_comment 
; 
The symmetry employed for this shelxl refinement is uniquely defined 
by the following loop, which should always be used as a source of 
symmetry information in preference to the above space-group names. 
They are only intended as comments. 
; 
  
loop_ 
 _space_group_symop_operation_xyz 
 'x, y, z' 
 '-x, -y, -z' 
  
_cell_length_a                    7.6230(6) 
_cell_length_b                    10.7719(7) 
_cell_length_c                    11.8700(9) 
_cell_angle_alpha                 97.780(6) 
_cell_angle_beta                  97.592(6) 
_cell_angle_gamma                 100.123(6) 
_cell_volume                      938.46(12) 
_cell_formula_units_Z             2 
_cell_measurement_temperature     293(2) 
_cell_measurement_reflns_used     2130 
_cell_measurement_theta_min       3.465 
_cell_measurement_theta_max       27.492 
  
_exptl_crystal_description        prismatic 
_exptl_crystal_colour             colorless 
_exptl_crystal_density_meas       ? 
_exptl_crystal_density_method     ? 
_exptl_crystal_density_diffrn     1.297 
_exptl_crystal_F_000              384 
_exptl_transmission_factor_min    ? 
_exptl_transmission_factor_max    ? 
_exptl_crystal_size_max           0.200 
_exptl_crystal_size_mid           0.160 
_exptl_crystal_size_min           0.120 
_exptl_absorpt_coefficient_mu     0.195 
_shelx_estimated_absorpt_T_min    0.962 
_shelx_estimated_absorpt_T_max    0.977 
_exptl_absorpt_correction_type    multi-scan 
_exptl_absorpt_correction_T_min   0.87131 
_exptl_absorpt_correction_T_max   1.00000 
_exptl_absorpt_process_details    sadabs 
  
_exptl_special_details 
; 
 ? 
; 
  
_diffrn_ambient_temperature       293(2) 
_diffrn_radiation_wavelength      0.71073 
_diffrn_radiation_type            MoK\a 
_diffrn_source                    ? 
_diffrn_measurement_device_type   'CCD area detector' 
_diffrn_measurement_method        'phi and omega scans' 
_diffrn_detector_area_resol_mean  ? 
_diffrn_reflns_number             6844 
_diffrn_reflns_av_unetI/netI      0.0323 
_diffrn_reflns_av_R_equivalents   0.0196 
_diffrn_reflns_limit_h_min        -9 
_diffrn_reflns_limit_h_max        9 
_diffrn_reflns_limit_k_min        -11 
_diffrn_reflns_limit_k_max        13 
_diffrn_reflns_limit_l_min        -14 
_diffrn_reflns_limit_l_max        10 
_diffrn_reflns_theta_min          3.040 
_diffrn_reflns_theta_max          26.000 
_diffrn_reflns_theta_full         25.242 
_diffrn_measured_fraction_theta_max   0.998 
_diffrn_measured_fraction_theta_full  0.998 
_diffrn_reflns_Laue_measured_fraction_max    0.998 
_diffrn_reflns_Laue_measured_fraction_full   0.998 
_diffrn_reflns_point_group_measured_fraction_max   0.998 
_diffrn_reflns_point_group_measured_fraction_full  0.998 
_reflns_number_total              3686 
_reflns_number_gt                 2659 
_reflns_threshold_expression      'I > 2\s(I)' 
_reflns_Friedel_coverage          0.000 
_reflns_Friedel_fraction_max      . 
_reflns_Friedel_fraction_full     . 
  
_reflns_special_details 
; 
 Reflections were merged by SHELXL according to the crystal 
 class for the calculation of statistics and refinement. 
  
 _reflns_Friedel_fraction is defined as the number of unique 
 Friedel pairs measured divided by the number that would be 
 possible theoretically, ignoring centric projections and 
 systematic absences. 
; 
  
_computing_data_collection        'Bruker SMART' 
_computing_cell_refinement        'Bruker SMART' 
_computing_data_reduction         'Bruker SAINT' 
_computing_structure_solution     'Bruker SHELXTL' 
_computing_structure_refinement   'SHELXL-2013 (Sheldrick, 2013)' 
_computing_molecular_graphics     'Bruker SHELXTL' 
_computing_publication_material   'Bruker SHELXTL' 
  
_refine_special_details 
; 
 ? 
; 
_refine_ls_structure_factor_coef  Fsqd 
_refine_ls_matrix_type            full 
_refine_ls_weighting_scheme       calc 
_refine_ls_weighting_details 
'w=1/[\s^2^(Fo^2^)+(0.0477P)^2^+0.2279P] where P=(Fo^2^+2Fc^2^)/3' 
_atom_sites_solution_primary      ? 
_atom_sites_solution_secondary    ? 
_atom_sites_solution_hydrogens    geom 
_refine_ls_hydrogen_treatment     constr 
_refine_ls_extinction_method      SHELXL 
_refine_ls_extinction_coef        0.024(3) 
_refine_ls_extinction_expression 
 'Fc^*^=kFc[1+0.001xFc^2^\l^3^/sin(2\q)]^-1/4^' 
_refine_ls_number_reflns          3686 
_refine_ls_number_parameters      238 
_refine_ls_number_restraints      0 
_refine_ls_R_factor_all           0.0683 
_refine_ls_R_factor_gt            0.0451 
_refine_ls_wR_factor_ref          0.1207 
_refine_ls_wR_factor_gt           0.1045 
_refine_ls_goodness_of_fit_ref    1.028 
_refine_ls_restrained_S_all       1.028 
_refine_ls_shift/su_max           0.001 
_refine_ls_shift/su_mean          0.000 
  
loop_ 
 _atom_site_label 
 _atom_site_type_symbol 
 _atom_site_fract_x 
 _atom_site_fract_y 
 _atom_site_fract_z 
 _atom_site_U_iso_or_equiv 
 _atom_site_adp_type 
 _atom_site_occupancy 
 _atom_site_site_symmetry_order 
 _atom_site_calc_flag 
 _atom_site_refinement_flags_posn 
 _atom_site_refinement_flags_adp 
 _atom_site_refinement_flags_occupancy 
 _atom_site_disorder_assembly 
 _atom_site_disorder_group 
S1 S 1.29729(8) 0.57797(6) 0.02435(5) 0.0681(2) Uani 1 1 d . . . . . 
O1 O 1.05397(17) 0.71937(12) -0.02809(11) 0.0511(4) Uani 1 1 d . . . . . 
O2 O 1.1595(3) 0.52778(15) 0.24917(15) 0.0852(6) Uani 1 1 d . . . . . 
O3 O 0.7193(3) 0.87795(16) 0.20473(16) 0.0855(6) Uani 1 1 d . . . . . 
O4 O 0.74240(18) 0.69037(13) 0.25834(12) 0.0559(4) Uani 1 1 d . . . . . 
C1 C 0.9246(2) 0.77740(18) 0.01619(17) 0.0473(5) Uani 1 1 d . . . . . 
C2 C 0.9198(2) 0.75589(17) 0.12583(17) 0.0461(5) Uani 1 1 d . . . . . 
C3 C 1.0551(3) 0.68049(17) 0.15208(17) 0.0471(5) Uani 1 1 d . . . . . 
C4 C 1.1298(3) 0.66060(18) 0.05535(18) 0.0498(5) Uani 1 1 d . . . . . 
C5 C 1.1131(3) 0.63116(19) 0.25768(18) 0.0519(5) Uani 1 1 d . . . . . 
C6 C 1.1280(3) 0.70836(19) 0.37286(18) 0.0520(5) Uani 1 1 d . . . . . 
C7 C 1.1295(3) 0.6471(3) 0.4676(2) 0.0760(7) Uani 1 1 d . . . . . 
H7 H 1.1201 0.5589 0.4577 0.091 Uiso 1 1 calc R U . . . 
C8 C 1.1447(5) 0.7143(4) 0.5760(3) 0.1061(10) Uani 1 1 d . . . . . 
H8 H 1.1423 0.6714 0.6389 0.127 Uiso 1 1 calc R U . . . 
C9 C 1.1631(5) 0.8435(4) 0.5919(3) 0.1134(12) Uani 1 1 d . . . . . 
H9 H 1.1732 0.8891 0.6656 0.136 Uiso 1 1 calc R U . . . 
C10 C 1.1668(4) 0.9061(3) 0.4998(3) 0.0995(10) Uani 1 1 d . . . . . 
H10 H 1.1821 0.9948 0.5112 0.119 Uiso 1 1 calc R U . . . 
C11 C 1.1478(3) 0.8392(2) 0.3891(2) 0.0703(7) Uani 1 1 d . . . . . 
H11 H 1.1485 0.8825 0.3264 0.084 Uiso 1 1 calc R U . . . 
C12 C 0.8194(3) 0.83541(18) -0.06757(18) 0.0482(5) Uani 1 1 d . . . . . 
C13 C 0.7500(3) 0.94316(19) -0.0339(2) 0.0573(5) Uani 1 1 d . . . . . 
H13 H 0.7730 0.9816 0.0430 0.069 Uiso 1 1 calc R U . . . 
C14 C 0.6472(3) 0.9932(2) -0.1141(2) 0.0654(6) Uani 1 1 d . . . . . 
H14 H 0.6002 1.0648 -0.0908 0.079 Uiso 1 1 calc R U . . . 
C15 C 0.6137(3) 0.9386(2) -0.2274(2) 0.0743(7) Uani 1 1 d . . . . . 
H15 H 0.5435 0.9724 -0.2810 0.089 Uiso 1 1 calc R U . . . 
C16 C 0.6845(4) 0.8331(3) -0.2621(2) 0.0805(8) Uani 1 1 d . . . . . 
H16 H 0.6630 0.7965 -0.3395 0.097 Uiso 1 1 calc R U . . . 
C17 C 0.7872(3) 0.7813(2) -0.1827(2) 0.0663(6) Uani 1 1 d . . . . . 
H17 H 0.8345 0.7102 -0.2068 0.080 Uiso 1 1 calc R U . . . 
C18 C 0.7848(3) 0.7845(2) 0.19837(18) 0.0527(5) Uani 1 1 d . . . . . 
C19 C 0.6171(3) 0.7093(3) 0.3378(2) 0.0763(7) Uani 1 1 d . . . . . 
H19A H 0.5008 0.7135 0.2956 0.092 Uiso 1 1 calc R U . . . 
H19B H 0.6620 0.7892 0.3904 0.092 Uiso 1 1 calc R U . . . 
C20 C 0.5973(4) 0.6029(3) 0.4024(3) 0.1061(10) Uani 1 1 d . . . . . 
H20A H 0.5430 0.5252 0.3506 0.159 Uiso 1 1 calc R U . . . 
H20B H 0.5220 0.6181 0.4595 0.159 Uiso 1 1 calc R U . . . 
H20C H 0.7139 0.5955 0.4395 0.159 Uiso 1 1 calc R U . . . 
C21 C 1.3504(4) 0.6323(3) -0.1045(2) 0.0844(8) Uani 1 1 d . . . . . 
H21A H 1.2472 0.6052 -0.1641 0.127 Uiso 1 1 calc R U . . . 
H21B H 1.4496 0.5970 -0.1279 0.127 Uiso 1 1 calc R U . . . 
H21C H 1.3832 0.7239 -0.0909 0.127 Uiso 1 1 calc R U . . . 
  
loop_ 
 _atom_site_aniso_label 
 _atom_site_aniso_U_11 
 _atom_site_aniso_U_22 
 _atom_site_aniso_U_33 
 _atom_site_aniso_U_23 
 _atom_site_aniso_U_13 
 _atom_site_aniso_U_12 
S1 0.0597(4) 0.0830(4) 0.0700(4) 0.0088(3) 0.0085(3) 0.0402(3) 
O1 0.0463(8) 0.0591(8) 0.0528(8) 0.0108(6) 0.0089(6) 0.0212(6) 
O2 0.1193(15) 0.0628(10) 0.0782(12) 0.0123(8) -0.0046(10) 0.0453(10) 
O3 0.1070(14) 0.0820(11) 0.0977(14) 0.0344(10) 0.0483(11) 0.0603(11) 
O4 0.0473(8) 0.0629(9) 0.0643(9) 0.0182(7) 0.0166(7) 0.0174(7) 
C1 0.0407(10) 0.0468(10) 0.0565(13) 0.0076(9) 0.0074(9) 0.0151(8) 
C2 0.0422(10) 0.0435(10) 0.0542(12) 0.0090(8) 0.0060(9) 0.0133(8) 
C3 0.0427(11) 0.0456(10) 0.0546(12) 0.0083(9) 0.0053(9) 0.0150(8) 
C4 0.0418(11) 0.0497(11) 0.0582(13) 0.0085(9) 0.0003(9) 0.0155(9) 
C5 0.0459(11) 0.0486(11) 0.0620(14) 0.0136(9) 0.0027(9) 0.0125(9) 
C6 0.0398(11) 0.0590(12) 0.0566(13) 0.0105(10) 0.0000(9) 0.0129(9) 
C7 0.0770(17) 0.0908(17) 0.0624(16) 0.0226(13) 0.0017(12) 0.0222(14) 
C8 0.112(3) 0.151(3) 0.060(2) 0.0203(19) 0.0048(17) 0.041(2) 
C9 0.100(2) 0.158(3) 0.068(2) -0.026(2) -0.0125(17) 0.043(2) 
C10 0.095(2) 0.088(2) 0.098(2) -0.0248(18) -0.0158(18) 0.0235(17) 
C11 0.0664(15) 0.0624(14) 0.0750(17) 0.0027(12) -0.0041(12) 0.0118(11) 
C12 0.0423(11) 0.0498(11) 0.0554(13) 0.0146(9) 0.0072(9) 0.0129(9) 
C13 0.0564(13) 0.0540(12) 0.0652(14) 0.0147(10) 0.0077(10) 0.0184(10) 
C14 0.0591(14) 0.0591(13) 0.0877(19) 0.0282(12) 0.0128(12) 0.0244(11) 
C15 0.0660(15) 0.0840(17) 0.0816(19) 0.0395(14) 0.0028(13) 0.0251(13) 
C16 0.0945(19) 0.0922(18) 0.0580(15) 0.0183(13) -0.0003(13) 0.0319(16) 
C17 0.0758(16) 0.0690(14) 0.0613(15) 0.0149(11) 0.0109(12) 0.0304(12) 
C18 0.0483(12) 0.0588(12) 0.0553(13) 0.0118(10) 0.0072(9) 0.0205(10) 
C19 0.0650(15) 0.0916(18) 0.0830(18) 0.0193(14) 0.0333(14) 0.0243(13) 
C20 0.100(2) 0.141(3) 0.106(2) 0.062(2) 0.0530(19) 0.044(2) 
C21 0.0758(18) 0.0998(19) 0.091(2) 0.0183(15) 0.0348(15) 0.0364(15) 
  
_geom_special_details 
; 
 All esds (except the esd in the dihedral angle between two l.s. planes) 
 are estimated using the full covariance matrix.  The cell esds are taken 
 into account individually in the estimation of esds in distances, angles 
 and torsion angles; correlations between esds in cell parameters are only 
 used when they are defined by crystal symmetry.  An approximate (isotropic) 
 treatment of cell esds is used for estimating esds involving l.s. planes. 
; 
  
loop_ 
 _geom_bond_atom_site_label_1 
 _geom_bond_atom_site_label_2 
 _geom_bond_distance 
 _geom_bond_site_symmetry_2 
 _geom_bond_publ_flag 
S1 C4 1.7300(19) . ? 
S1 C21 1.780(3) . ? 
O1 C4 1.365(2) . ? 
O1 C1 1.380(2) . ? 
O2 C5 1.222(2) . ? 
O3 C18 1.198(2) . ? 
O4 C18 1.334(2) . ? 
O4 C19 1.449(3) . ? 
C1 C2 1.356(3) . ? 
C1 C12 1.468(3) . ? 
C2 C3 1.449(2) . ? 
C2 C18 1.473(3) . ? 
C3 C4 1.355(3) . ? 
C3 C5 1.471(3) . ? 
C5 C6 1.480(3) . ? 
C6 C11 1.375(3) . ? 
C6 C7 1.379(3) . ? 
C7 C8 1.369(4) . ? 
C7 H7 0.9300 . ? 
C8 C9 1.359(5) . ? 
C8 H8 0.9300 . ? 
C9 C10 1.361(5) . ? 
C9 H9 0.9300 . ? 
C10 C11 1.387(4) . ? 
C10 H10 0.9300 . ? 
C11 H11 0.9300 . ? 
C12 C17 1.383(3) . ? 
C12 C13 1.390(3) . ? 
C13 C14 1.379(3) . ? 
C13 H13 0.9300 . ? 
C14 C15 1.365(3) . ? 
C14 H14 0.9300 . ? 
C15 C16 1.378(3) . ? 
C15 H15 0.9300 . ? 
C16 C17 1.383(3) . ? 
C16 H16 0.9300 . ? 
C17 H17 0.9300 . ? 
C19 C20 1.460(4) . ? 
C19 H19A 0.9700 . ? 
C19 H19B 0.9700 . ? 
C20 H20A 0.9600 . ? 
C20 H20B 0.9600 . ? 
C20 H20C 0.9600 . ? 
C21 H21A 0.9600 . ? 
C21 H21B 0.9600 . ? 
C21 H21C 0.9600 . ? 
  
loop_ 
 _geom_angle_atom_site_label_1 
 _geom_angle_atom_site_label_2 
 _geom_angle_atom_site_label_3 
 _geom_angle 
 _geom_angle_site_symmetry_1 
 _geom_angle_site_symmetry_3 
 _geom_angle_publ_flag 
C4 S1 C21 101.51(11) . . ? 
C4 O1 C1 107.56(15) . . ? 
C18 O4 C19 116.23(17) . . ? 
C2 C1 O1 109.29(15) . . ? 
C2 C1 C12 136.53(18) . . ? 
O1 C1 C12 113.92(17) . . ? 
C1 C2 C3 106.83(17) . . ? 
C1 C2 C18 126.97(17) . . ? 
C3 C2 C18 125.51(18) . . ? 
C4 C3 C2 105.95(17) . . ? 
C4 C3 C5 122.70(17) . . ? 
C2 C3 C5 131.35(19) . . ? 
C3 C4 O1 110.36(16) . . ? 
C3 C4 S1 131.36(15) . . ? 
O1 C4 S1 118.27(15) . . ? 
O2 C5 C3 118.94(19) . . ? 
O2 C5 C6 119.77(18) . . ? 
C3 C5 C6 121.15(17) . . ? 
C11 C6 C7 118.9(2) . . ? 
C11 C6 C5 122.4(2) . . ? 
C7 C6 C5 118.6(2) . . ? 
C8 C7 C6 120.9(3) . . ? 
C8 C7 H7 119.6 . . ? 
C6 C7 H7 119.6 . . ? 
C9 C8 C7 120.1(3) . . ? 
C9 C8 H8 119.9 . . ? 
C7 C8 H8 119.9 . . ? 
C8 C9 C10 119.9(3) . . ? 
C8 C9 H9 120.1 . . ? 
C10 C9 H9 120.1 . . ? 
C9 C10 C11 120.7(3) . . ? 
C9 C10 H10 119.6 . . ? 
C11 C10 H10 119.6 . . ? 
C6 C11 C10 119.4(3) . . ? 
C6 C11 H11 120.3 . . ? 
C10 C11 H11 120.3 . . ? 
C17 C12 C13 119.01(18) . . ? 
C17 C12 C1 119.40(18) . . ? 
C13 C12 C1 121.60(18) . . ? 
C14 C13 C12 120.2(2) . . ? 
C14 C13 H13 119.9 . . ? 
C12 C13 H13 119.9 . . ? 
C15 C14 C13 120.6(2) . . ? 
C15 C14 H14 119.7 . . ? 
C13 C14 H14 119.7 . . ? 
C14 C15 C16 119.7(2) . . ? 
C14 C15 H15 120.1 . . ? 
C16 C15 H15 120.1 . . ? 
C15 C16 C17 120.5(2) . . ? 
C15 C16 H16 119.8 . . ? 
C17 C16 H16 119.8 . . ? 
C16 C17 C12 120.0(2) . . ? 
C16 C17 H17 120.0 . . ? 
C12 C17 H17 120.0 . . ? 
O3 C18 O4 123.1(2) . . ? 
O3 C18 C2 126.3(2) . . ? 
O4 C18 C2 110.54(16) . . ? 
O4 C19 C20 108.9(2) . . ? 
O4 C19 H19A 109.9 . . ? 
C20 C19 H19A 109.9 . . ? 
O4 C19 H19B 109.9 . . ? 
C20 C19 H19B 109.9 . . ? 
H19A C19 H19B 108.3 . . ? 
C19 C20 H20A 109.5 . . ? 
C19 C20 H20B 109.5 . . ? 
H20A C20 H20B 109.5 . . ? 
C19 C20 H20C 109.5 . . ? 
H20A C20 H20C 109.5 . . ? 
H20B C20 H20C 109.5 . . ? 
S1 C21 H21A 109.5 . . ? 
S1 C21 H21B 109.5 . . ? 
H21A C21 H21B 109.5 . . ? 
S1 C21 H21C 109.5 . . ? 
H21A C21 H21C 109.5 . . ? 
H21B C21 H21C 109.5 . . ? 
  
loop_ 
 _geom_torsion_atom_site_label_1 
 _geom_torsion_atom_site_label_2 
 _geom_torsion_atom_site_label_3 
 _geom_torsion_atom_site_label_4 
 _geom_torsion 
 _geom_torsion_site_symmetry_1 
 _geom_torsion_site_symmetry_2 
 _geom_torsion_site_symmetry_3 
 _geom_torsion_site_symmetry_4 
 _geom_torsion_publ_flag 
C4 O1 C1 C2 0.2(2) . . . . ? 
C4 O1 C1 C12 -174.85(16) . . . . ? 
O1 C1 C2 C3 0.4(2) . . . . ? 
C12 C1 C2 C3 173.9(2) . . . . ? 
O1 C1 C2 C18 -170.50(18) . . . . ? 
C12 C1 C2 C18 3.0(4) . . . . ? 
C1 C2 C3 C4 -0.9(2) . . . . ? 
C18 C2 C3 C4 170.19(18) . . . . ? 
C1 C2 C3 C5 178.6(2) . . . . ? 
C18 C2 C3 C5 -10.4(3) . . . . ? 
C2 C3 C4 O1 1.0(2) . . . . ? 
C5 C3 C4 O1 -178.48(17) . . . . ? 
C2 C3 C4 S1 -179.43(16) . . . . ? 
C5 C3 C4 S1 1.0(3) . . . . ? 
C1 O1 C4 C3 -0.8(2) . . . . ? 
C1 O1 C4 S1 179.57(13) . . . . ? 
C21 S1 C4 C3 -166.2(2) . . . . ? 
C21 S1 C4 O1 13.30(19) . . . . ? 
C4 C3 C5 O2 -35.0(3) . . . . ? 
C2 C3 C5 O2 145.6(2) . . . . ? 
C4 C3 C5 C6 140.7(2) . . . . ? 
C2 C3 C5 C6 -38.7(3) . . . . ? 
O2 C5 C6 C11 153.9(2) . . . . ? 
C3 C5 C6 C11 -21.8(3) . . . . ? 
O2 C5 C6 C7 -23.4(3) . . . . ? 
C3 C5 C6 C7 160.9(2) . . . . ? 
C11 C6 C7 C8 2.0(4) . . . . ? 
C5 C6 C7 C8 179.4(2) . . . . ? 
C6 C7 C8 C9 -1.7(5) . . . . ? 
C7 C8 C9 C10 -0.1(5) . . . . ? 
C8 C9 C10 C11 1.4(5) . . . . ? 
C7 C6 C11 C10 -0.7(3) . . . . ? 
C5 C6 C11 C10 -178.0(2) . . . . ? 
C9 C10 C11 C6 -1.0(4) . . . . ? 
C2 C1 C12 C17 -141.9(2) . . . . ? 
O1 C1 C12 C17 31.4(3) . . . . ? 
C2 C1 C12 C13 37.7(4) . . . . ? 
O1 C1 C12 C13 -149.08(18) . . . . ? 
C17 C12 C13 C14 1.5(3) . . . . ? 
C1 C12 C13 C14 -178.08(19) . . . . ? 
C12 C13 C14 C15 -0.7(3) . . . . ? 
C13 C14 C15 C16 -0.5(4) . . . . ? 
C14 C15 C16 C17 0.8(4) . . . . ? 
C15 C16 C17 C12 0.0(4) . . . . ? 
C13 C12 C17 C16 -1.2(3) . . . . ? 
C1 C12 C17 C16 178.4(2) . . . . ? 
C19 O4 C18 O3 -3.0(3) . . . . ? 
C19 O4 C18 C2 177.07(18) . . . . ? 
C1 C2 C18 O3 -40.3(3) . . . . ? 
C3 C2 C18 O3 150.4(2) . . . . ? 
C1 C2 C18 O4 139.6(2) . . . . ? 
C3 C2 C18 O4 -29.6(3) . . . . ? 
C18 O4 C19 C20 -175.5(2) . . . . ? 
  
_refine_diff_density_max    0.274 
_refine_diff_density_min   -0.255 
_refine_diff_density_rms    0.034 
  
_shelxl_version_number 2013-4 
  
_shelx_res_file 
; 
TITL CF solution in P-1 
CELL 0.71073 7.62296 10.77191 11.86996 97.7801 97.592 100.1228 
ZERR 2 0.00061 0.00065 0.0009 0.0056 0.0064 0.0058 
LATT 1 
SFAC C  H  O  S 
UNIT 42 36 8 2 
OMIT  -3.00  52.00 
L.S. 10 
ACTA 
BOND $H 
FMAP 2 
PLAN 25 
wpdb -1 
size 0.20 0.16 0.12 
mpla c12 > c17 
mpla c6 > c11 
mpla o1 c1 > c4 
htab 
conf 
WGHT    0.047700    0.227900 
EXTI    0.023862 
FVAR       9.03699 
S1    4    1.297290    0.577966    0.024346    11.00000    0.05966    0.08298 = 
         0.06997    0.00875    0.00854    0.04016 
O1    3    1.053975    0.719372   -0.028089    11.00000    0.04631    0.05912 = 
         0.05279    0.01085    0.00894    0.02120 
O2    3    1.159496    0.527779    0.249174    11.00000    0.11933    0.06281 = 
         0.07817    0.01231   -0.00456    0.04533 
O3    3    0.719283    0.877953    0.204733    11.00000    0.10697    0.08200 = 
         0.09767    0.03444    0.04833    0.06031 
O4    3    0.742399    0.690366    0.258341    11.00000    0.04727    0.06290 = 
         0.06429    0.01815    0.01665    0.01744 
C1    1    0.924642    0.777396    0.016187    11.00000    0.04075    0.04684 = 
         0.05646    0.00762    0.00736    0.01514 
C2    1    0.919779    0.755892    0.125826    11.00000    0.04217    0.04349 = 
         0.05418    0.00905    0.00597    0.01330 
C3    1    1.055126    0.680490    0.152077    11.00000    0.04268    0.04561 = 
         0.05464    0.00830    0.00534    0.01496 
C4    1    1.129805    0.660601    0.055347    11.00000    0.04182    0.04967 = 
         0.05818    0.00850    0.00035    0.01555 
C5    1    1.113082    0.631160    0.257678    11.00000    0.04586    0.04858 = 
         0.06204    0.01360    0.00273    0.01248 
C6    1    1.128015    0.708363    0.372857    11.00000    0.03984    0.05903 = 
         0.05656    0.01051   -0.00004    0.01292 
C7    1    1.129495    0.647071    0.467607    11.00000    0.07704    0.09080 = 
         0.06245    0.02261    0.00172    0.02222 
AFIX  43 
H7    2    1.120066    0.558884    0.457699    11.00000   -1.20000 
AFIX   0 
C8    1    1.144656    0.714280    0.576041    11.00000    0.11179    0.15082 = 
         0.05970    0.02028    0.00480    0.04065 
AFIX  43 
H8    2    1.142335    0.671430    0.638949    11.00000   -1.20000 
AFIX   0 
C9    1    1.163100    0.843545    0.591937    11.00000    0.10045    0.15800 = 
         0.06849   -0.02569   -0.01254    0.04303 
AFIX  43 
H9    2    1.173200    0.889131    0.665633    11.00000   -1.20000 
AFIX   0 
C10   1    1.166761    0.906147    0.499846    11.00000    0.09456    0.08767 = 
         0.09836   -0.02483   -0.01579    0.02355 
AFIX  43 
H10   2    1.182119    0.994770    0.511245    11.00000   -1.20000 
AFIX   0 
C11   1    1.147832    0.839198    0.389121    11.00000    0.06644    0.06238 = 
         0.07502    0.00269   -0.00410    0.01177 
AFIX  43 
H11   2    1.148542    0.882458    0.326435    11.00000   -1.20000 
AFIX   0 
C12   1    0.819388    0.835415   -0.067565    11.00000    0.04233    0.04984 = 
         0.05545    0.01461    0.00725    0.01289 
C13   1    0.750001    0.943158   -0.033900    11.00000    0.05644    0.05399 = 
         0.06516    0.01468    0.00767    0.01836 
AFIX  43 
H13   2    0.773004    0.981622    0.042975    11.00000   -1.20000 
AFIX   0 
C14   1    0.647167    0.993201   -0.114119    11.00000    0.05915    0.05914 = 
         0.08767    0.02816    0.01282    0.02441 
AFIX  43 
H14   2    0.600199    1.064788   -0.090797    11.00000   -1.20000 
AFIX   0 
C15   1    0.613728    0.938575   -0.227438    11.00000    0.06602    0.08396 = 
         0.08160    0.03946    0.00280    0.02513 
AFIX  43 
H15   2    0.543492    0.972390   -0.281004    11.00000   -1.20000 
AFIX   0 
C16   1    0.684477    0.833124   -0.262124    11.00000    0.09449    0.09222 = 
         0.05800    0.01827   -0.00025    0.03187 
AFIX  43 
H16   2    0.663030    0.796500   -0.339471    11.00000   -1.20000 
AFIX   0 
C17   1    0.787157    0.781349   -0.182742    11.00000    0.07581    0.06902 = 
         0.06135    0.01489    0.01088    0.03044 
AFIX  43 
H17   2    0.834544    0.710185   -0.206783    11.00000   -1.20000 
AFIX   0 
C18   1    0.784816    0.784490    0.198371    11.00000    0.04825    0.05877 = 
         0.05531    0.01181    0.00715    0.02051 
C19   1    0.617054    0.709340    0.337816    11.00000    0.06500    0.09158 = 
         0.08304    0.01926    0.03333    0.02427 
AFIX  23 
H19A  2    0.500811    0.713539    0.295638    11.00000   -1.20000 
H19B  2    0.661973    0.789173    0.390386    11.00000   -1.20000 
AFIX   0 
C20   1    0.597300    0.602923    0.402377    11.00000    0.10025    0.14136 = 
         0.10629    0.06199    0.05297    0.04400 
AFIX 137 
H20A  2    0.543025    0.525181    0.350625    11.00000   -1.50000 
H20B  2    0.521960    0.618076    0.459471    11.00000   -1.50000 
H20C  2    0.713927    0.595541    0.439486    11.00000   -1.50000 
AFIX   0 
C21   1    1.350442    0.632253   -0.104493    11.00000    0.07580    0.09979 = 
         0.09133    0.01829    0.03481    0.03635 
AFIX 137 
H21A  2    1.247193    0.605231   -0.164119    11.00000   -1.50000 
H21B  2    1.449636    0.596956   -0.127914    11.00000   -1.50000 
H21C  2    1.383166    0.723853   -0.090943    11.00000   -1.50000 
AFIX   0 
HKLF 4 
  
REM  CF solution in P-1 
REM R1 =  0.0451 for    2659 Fo > 4sig(Fo)  and  0.0683 for all    3686 data 
REM    238 parameters refined using      0 restraints 
  
END 
  
WGHT      0.0473      0.2286 
  
REM No hydrogen bonds found for HTAB generation 
  
REM Highest difference peak  0.274,  deepest hole -0.255,  1-sigma level  0.034 
Q1    1   1.3789  0.6624  0.0395  11.00000  0.05    0.27 
Q2    1   0.6801  0.8195  0.1504  11.00000  0.05    0.17 
Q3    1   0.9787  0.7111  0.1551  11.00000  0.05    0.17 
Q4    1   0.6592  0.7232  0.4261  11.00000  0.05    0.16 
Q5    1   1.0636  0.6522  0.2014  11.00000  0.05    0.14 
Q6    1   0.8810  0.8137 -0.0242  11.00000  0.05    0.14 
Q7    1   1.2465  0.8812  0.5437  11.00000  0.05    0.14 
Q8    1   0.8815  0.7719  0.1614  11.00000  0.05    0.13 
Q9    1   0.8239  0.9029 -0.0577  11.00000  0.05    0.13 
Q10   1   1.3418  0.7106 -0.1423  11.00000  0.05    0.13 
Q11   1   1.0935  0.6654  0.0228  11.00000  0.05    0.13 
Q12   1   1.2487  0.8942  0.4452  11.00000  0.05    0.13 
Q13   1   0.6616  0.5157  0.3849  11.00000  0.05    0.12 
Q14   1   0.5610  0.6216  0.3010  11.00000  0.05    0.12 
Q15   1   0.7524  0.7554  0.4479  11.00000  0.05    0.12 
Q16   1   1.3479  0.5270  0.0965  11.00000  0.05    0.12 
Q17   1   1.1879  0.6114  0.0410  11.00000  0.05    0.12 
Q18   1   1.1275  0.4824  0.1658  11.00000  0.05    0.11 
Q19   1   1.0535  0.5147  0.2294  11.00000  0.05    0.11 
Q20   1   1.4101  0.5390 -0.1110  11.00000  0.05    0.11 
Q21   1   0.8699  0.8438 -0.1321  11.00000  0.05    0.11 
Q22   1   0.5787  0.8093  0.3360  11.00000  0.05    0.11 
Q23   1   1.0689  0.6386  0.1047  11.00000  0.05    0.11 
Q24   1   1.1950  1.0338  0.4422  11.00000  0.05    0.11 
Q25   1   1.0914  0.7595  0.3735  11.00000  0.05    0.11 
; 
_shelx_res_checksum   20570 
  
_shelx_hkl_file 
; 
   0   0   2 28716.0 408.678   2 
   0   0   3 23699.8 451.899   2 
   0   0   4 94299.5 1048.29   2 
   0   0   5 94636.5 1176.13   2 
   0   0   6 5969.40 328.820   2 
   0   0  -6 6337.42 331.048   4 
   0   0  -7 490.288 102.302   4 
   0   0   7 757.987 132.209   2 
   0   0  -8 18240.7 654.789   4 
   0   0   8 16979.4 641.300   2 
   0   0  -8 16082.5 663.129   2 
   0   0  -9 935.609 205.698   2 
   0   0 -10 810.596 197.517   2 
   0   0 -11 367.738 165.670   2 
   0   0 -12-55.7972 110.785   2 
   0   0 -13 1940.26 327.648   2 
   0   0 -14 991.671 251.191   2 
   0   1 -15-23.3016 104.415   3 
   0   1 -14 107.000 152.739   3 
   0   1 -14 123.613 122.762   2 
   0   1 -13 320.876 188.900   3 
   0   1 -13 381.735 204.831   2 
   0   1 -12 89.5122 134.454   2 
   0   1 -11 2317.20 305.947   2 
   0   1 -10 4699.24 408.793   2 
   0   1  -9 11565.5 592.916   2 
   0   1  -8 3498.50 310.071   2 
   0  -1   8 3221.66 281.631   2 
   0   1  -8 3353.75 278.368   4 
   0  -1   7 14443.8 544.760   2 
   0   1  -7 14136.3 561.305   2 
   0  -1   6 620.657 113.048   2 
   0  -1   5 354.196 77.5968   2 
   0  -1   4 6168.69 264.114   2 
   0  -1   3 24933.5 456.692   2 
   0  -1  -2 32038.0 455.061   4 
   0  -1  -2 35119.0 506.874   1 
   0  -1  -3 86800.8 889.108   4 
   0  -1  -3 88530.3 934.105   1 
   0   1   3 88872.6 919.424   2 
   0   1   4 22361.2 530.196   2 
   0  -1  -4 23427.2 556.330   1 
   0  -1  -4 24323.4 538.767   4 
   0  -1  -5 7269.52 334.204   4 
   0   1   5 7921.01 353.318   2 
   0  -1  -6 1828.50 187.180   4 
   0  -1  -7 12362.9 509.498   4 
   0  -1  -8 3793.70 329.456   1 
   0  -1  -8 3022.94 297.358   2 
   0  -1  -9 11277.5 593.048   1 
   0  -1  -9 9874.09 564.728   2 
   0  -1 -10 2363.45 301.637   2 
   0  -1 -11 269.494 152.836   2 
   0  -1 -12-24.7065 131.863   2 
   0  -1 -13 89.8398 125.884   2 
   0  -1 -14 898.013 263.364   2 
   0   2 -15 384.687 192.620   3 
   0   2 -14 625.331 226.210   2 
   0   2 -14 202.162 149.008   3 
   0   2 -13 1915.24 319.953   2 
   0   2 -13 1881.25 328.827   3 
   0   2 -12 51.3089 140.321   2 
   0   2 -12 90.8558 154.193   3 
   0   2 -11 3693.54 390.359   2 
   0   2 -11 4060.01 417.126   3 
   0   2 -10 165.162 118.245   2 
   0   2 -10 236.548 144.173   3 
   0   2  -9 32138.9 972.788   2 
   0   2  -9 33094.0 1009.07   3 
   0   2  -8 23332.0 768.743   2 
   0   2  -8 24963.6 818.349   3 
   0  -2   8 24145.4 742.484   2 
   0  -2   7 35.0088 57.5708   2 
   0   2  -7-34.0277 96.1747   3 
   0   2  -7-6.59194 71.4874   2 
   0   2  -6 582.507 119.159   3 
   0   2  -6 714.265 129.718   2 
   0  -2   6 1004.61 131.989   2 
   0   2  -5 46646.8 823.217   2 
   0  -2   5 46659.7 806.891   2 
   0   2  -5 46774.7 849.199   3 
   0   2  -4 133093. 1220.59   2 
   0  -2   4 136125. 1214.66   2 
   0   2  -3 46.9745 36.9996   3 
   0  -2   3 40.1428 32.1133   2 
   0   2  -3 24.3819 36.4207   2 
   0   2  -2 2974.88 134.270   2 
   0  -2   2 3161.69 146.516   3 
   0  -2   2 2794.54 123.284   2 
   0   2  -1 180678. 756.105   4 
   0   2   0 238542. 841.092   4 
   0  -2   0 239642. 1319.90   1 
   0  -2  -1 123248. 781.914   4 
   0   2   1 121286. 772.552   4 
   0  -2  -1 120727. 1012.95   1 
   0  -2  -2 24701.3 427.429   4 
   0  -2  -2 26565.3 522.703   1 
   0  -2  -3 3792.58 221.826   1 
   0  -2  -3 3979.81 200.907   4 
   0  -2  -4 979.444 128.097   1 
   0  -2  -4 641.676 95.8683   4 
   0  -2  -5 148573. 1540.78   4 
   0  -2  -5 147432. 1658.55   1 
   0  -2  -6 5755.42 330.653   4 
   0  -2  -6 4918.27 332.053   1 
   0  -2  -7 3451.44 301.126   1 
   0  -2  -7 3087.40 263.573   4 
   0  -2  -8 5446.79 402.876   1 
   0  -2  -8 5866.31 418.188   2 
   0  -2  -9 6334.96 462.826   2 
   0  -2 -10-57.9823 149.532   2 
   0  -2 -11 65.5042 146.756   2 
   0  -2 -12 72.6116 122.855   2 
   0  -2 -13 262.538 159.619   2 
   0  -2 -14 25.6916 149.406   2 
   0   3 -15 220.826 147.252   2 
   0   3 -15 157.133 139.103   3 
   0   3 -14 515.269 195.597   3 
   0   3 -14 366.897 161.227   2 
   0   3 -13 2035.68 328.948   2 
   0   3 -13 2011.66 341.133   3 
   0   3 -12 1615.24 286.121   2 
   0   3 -12 1736.40 302.622   3 
   0   3 -11 1486.53 270.277   2 
   0   3 -11 1095.95 241.685   3 
   0   3 -10 7010.94 497.381   2 
   0   3 -10 7503.83 524.522   3 
   0   3  -9-59.3010 111.643   4 
   0   3  -9 71.6926 91.8723   3 
   0   3  -9 12.2587 106.306   2 
   0   3  -8 2993.31 292.349   3 
   0  -3   8 2909.99 261.848   2 
   0   3  -8 2874.56 275.108   2 
   0  -3   7 3642.29 272.546   2 
   0   3  -7 3193.63 270.035   2 
   0   3  -7 4060.05 309.546   3 
   0  -3   6 11359.7 437.989   2 
   0   3  -6 11585.2 475.942   3 
   0   3  -6 11978.5 462.906   2 
   0   3  -5 162183. 1547.31   2 
   0   3  -5 160552. 1621.17   3 
   0  -3   5 162310. 1481.45   2 
   0  -3   4 105.257 60.9686   3 
   0  -3   4-6.82320 38.4772   2 
   0   3  -4 16.8763 50.4551   2 
   0  -3   3 1794.89 136.039   3 
   0   3  -3 1928.59 137.277   2 
   0  -3   3 1932.85 125.845   2 
   0   3  -2 54361.7 625.490   2 
   0  -3   2 53616.1 581.631   2 
   0  -3   1 9793.34 318.213   1 
   0   3  -1 9864.15 201.029   4 
   0  -3   1 9257.62 228.698   2 
   0   3   0 46379.5 445.700   4 
   0  -3   0 44626.6 479.050   4 
   0  -3   0 45406.1 700.182   1 
   0  -3  -1 4544.65 233.809   1 
   0  -3  -1 4375.06 173.743   4 
   0   3   1 4402.73 167.765   4 
   0   3   2 10159.4 298.472   4 
   0  -3  -2 10511.2 382.729   1 
   0  -3  -2 10384.9 303.617   4 
   0  -3  -3 1573.46 141.734   2 
   0   3   3 1607.22 166.130   1 
   0  -3  -3 1722.86 141.725   4 
   0  -3  -3 1646.60 169.508   1 
   0  -3  -4 3381.18 222.397   4 
   0   3   4 3114.70 232.814   1 
   0  -3  -4 3262.09 253.245   1 
   0  -3  -5 2242.21 223.296   1 
   0  -3  -5 2421.41 204.263   4 
   0  -3  -6 14299.3 532.244   4 
   0  -3  -6 14431.9 595.909   1 
   0  -3  -6 13999.1 563.613   2 
   0  -3  -7 16565.0 681.959   1 
   0  -3  -7 15830.0 604.505   4 
   0  -3  -7 16140.2 655.667   2 
   0  -3  -8 10045.0 551.016   2 
   0  -3  -8 10571.9 579.666   1 
   0  -3  -9 1008.62 206.702   2 
   0  -3 -10 842.152 207.019   2 
   0  -3 -11-33.2305 128.376   2 
   0  -3 -12 60.0020 124.444   2 
   0  -3 -13 894.802 249.148   2 
   0   4 -15-61.0691 125.282   3 
   0   4 -15 8.86610 106.363   2 
   0   4 -14 1522.87 301.962   2 
   0   4 -14 1135.63 278.316   3 
   0   4 -13 102.087 125.475   2 
   0   4 -13 148.939 119.470   3 
   0   4 -12 955.552 231.401   3 
   0   4 -12 1427.04 267.965   2 
   0   4 -11 10652.6 646.480   2 
   0   4 -11 11229.9 679.647   3 
   0   4 -10 22206.5 890.605   3 
   0   4 -10 22854.4 880.709   2 
   0   4  -9 8574.48 523.833   3 
   0   4  -9 9150.26 521.557   2 
   0   4  -8 10523.4 521.073   2 
   0  -4   8 11807.3 515.538   2 
   0   4  -8 11048.8 555.331   3 
   0   4  -7 16546.3 601.861   2 
   0   4  -7 17165.9 649.644   3 
   0  -4   7 16820.0 575.509   2 
   0  -4   6 66822.1 1049.70   2 
   0   4  -6 68458.1 1133.39   2 
   0   4  -5 25698.7 631.416   2 
   0  -4   5 24773.2 582.508   2 
   0  -4   4 6029.90 284.132   3 
   0  -4   4 6399.32 264.890   2 
   0   4  -4 6335.82 291.018   2 
   0   4  -3 20042.7 459.418   2 
   0  -4   3 20075.4 415.462   2 
   0  -4   2 1327.59 102.442   2 
   0   4  -2 1399.78 95.3566   4 
   0  -4   1 4860.61 263.307   1 
   0   4  -1 5025.27 159.142   4 
   0  -4   1 4534.30 162.625   4 
   0  -4   0 3963.21 245.783   1 
   0  -4   0 3685.72 162.770   4 
   0   4   0 3965.40 150.500   4 
   0  -4  -1 44324.6 621.643   4 
   0  -4  -1 43313.6 827.358   1 
   0   4   1 42888.1 565.722   4 
   0  -4  -2 10477.4 431.677   1 
   0   4   2 10836.1 332.422   4 
   0   4   2 11285.5 452.782   1 
   0  -4  -2 10812.0 341.378   4 
   0  -4  -3 2034.32 199.517   1 
   0  -4  -3 1953.04 162.275   4 
   0   4   3 1853.85 194.003   1 
   0  -4  -3 2054.50 170.540   2 
   0  -4  -4 3778.16 291.479   1 
   0   4   4 4260.05 298.298   1 
   0  -4  -4 3555.79 245.188   2 
   0  -4  -4 4195.00 255.314   4 
   0  -4  -5 7748.44 378.959   4 
   0  -4  -5 6944.06 416.216   1 
   0  -4  -6 3932.67 332.409   1 
   0  -4  -6 4202.57 321.264   2 
   0  -4  -6 4639.40 318.491   4 
   0  -4  -7 1001.56 185.659   1 
   0  -4  -7 882.983 167.663   2 
   0  -4  -8 1684.10 247.484   1 
   0  -4  -8 1778.90 244.173   2 
   0  -4  -9 54.7642 119.479   2 
   0  -4 -10 8026.96 586.542   2 
   0  -4 -11 3381.47 406.646   2 
   0  -4 -12 1768.20 323.195   2 
   0  -4 -13 850.133 260.154   2 
   0   5 -15-310.106 180.907   3 
   0   5 -15-406.240 188.085   2 
   0   5 -14 132.635 119.583   2 
   0   5 -14 562.474 212.194   3 
   0   5 -13 35.0911 94.9325   3 
   0   5 -13 112.967 126.804   2 
   0   5 -12 1312.61 264.813   3 
   0   5 -12 1064.41 225.545   2 
   0   5 -11 385.203 151.817   2 
   0   5 -11 372.109 168.553   3 
   0   5 -10 2173.45 301.930   2 
   0   5 -10 2381.50 310.234   3 
   0   5  -9 34.3278 97.1719   2 
   0  -5   9 38.8941 81.9309   2 
   0  -5   8 73.8505 65.1940   2 
   0   5  -8 261.792 114.817   2 
   0   5  -7 13661.2 563.679   2 
   0  -5   7 13544.3 516.599   2 
   0   5  -6 4367.28 296.521   2 
   0  -5   6 4361.86 274.448   2 
   0  -5   5 5549.32 278.357   2 
   0   5  -5 5712.00 315.234   2 
   0  -5   5 5385.52 304.724   3 
   0  -5   4 29555.8 573.518   2 
   0  -5   4 27830.3 652.808   3 
   0   5  -4 28434.9 632.361   2 
   0   5  -3 2324.21 144.712   4 
   0  -5   3 1935.74 138.396   2 
   0   5  -2 19975.3 364.478   4 
   0  -5   2 19549.5 424.592   2 
   0   5  -1 43924.9 507.036   4 
   0  -5   1 44458.4 883.351   1 
   0  -5   0 1503.63 117.147   4 
   0   5   0 1305.14 96.8879   4 
   0   5   0 1086.30 160.793   1 
   0  -5   0 1163.60 149.495   1 
   0   5   1 18159.2 617.298   1 
   0  -5  -1 19135.2 453.459   4 
   0   5   1 19534.7 416.768   4 
   0  -5  -1 20110.7 620.630   1 
   0   5   2 22181.7 697.387   1 
   0   5   2 21581.7 498.570   4 
   0  -5  -2 22000.5 677.406   1 
   0  -5  -2 21528.2 523.699   4 
   0  -5  -3 3035.55 268.065   1 
   0  -5  -3 2955.42 212.425   2 
   0  -5  -3 3118.24 219.603   4 
   0  -5  -4 1717.82 215.398   1 
   0  -5  -4 1377.37 163.498   4 
   0  -5  -5 913.730 141.329   4 
   0  -5  -5 839.516 149.343   2 
   0  -5  -5 814.184 150.974   1 
   0  -5  -6 79.7636 59.5187   4 
   0  -5  -6 149.193 97.1002   2 
   0  -5  -6 0.80841 63.3851   1 
   0  -5  -7 6.32506 75.6689   1 
   0  -5  -7 17.5934 93.5336   2 
   0  -5  -8-25.1969 114.090   2 
   0  -5  -9 520.289 187.025   2 
   0  -5 -10 3211.16 388.161   2 
   0  -5 -11 1084.94 260.936   2 
   0  -5 -12 169.677 164.239   2 
   0   6 -15 100.481 109.127   2 
   0   6 -14 203.098 158.107   2 
   0   6 -13 228.108 144.506   2 
   0   6 -12 477.292 187.555   2 
   0   6 -11 9.08720 89.5503   2 
   0   6 -10 3937.78 394.573   2 
   0  -6   9 2398.01 247.639   2 
   0   6  -9 2151.68 270.657   2 
   0   6  -8 2725.82 283.279   2 
   0  -6   8 2451.69 241.554   2 
   0   6  -7 7050.70 415.256   2 
   0  -6   7 6803.29 360.893   2 
   0   6  -6 13818.0 536.467   2 
   0  -6   6 15484.3 502.736   2 
   0  -6   6 15105.4 545.284   3 
   0   6  -6 14993.0 685.393   1 
   0  -6   5 39402.5 866.390   3 
   0   6  -5 39706.8 833.580   2 
   0  -6   5 39681.1 732.406   2 
   0  -6   4 6417.38 270.408   2 
   0   6  -4 6583.35 273.416   4 
   0   6  -3 29426.7 508.148   4 
   0  -6   3 29327.2 556.015   2 
   0  -6   2 16313.5 410.932   2 
   0   6  -2 16986.1 342.691   4 
   0   6  -1 5502.62 191.616   4 
   0  -6   1 5118.93 214.443   4 
   0  -6   1 5547.79 345.795   1 
   0  -6   0 262.987 60.0197   4 
   0   6   0 359.492 60.0101   4 
   0   6   1 62607.4 803.327   4 
   0  -6  -1 62911.5 1199.80   1 
   0  -6  -1 60575.7 877.431   4 
   0   6   2 21956.0 530.104   4 
   0  -6  -2 23082.1 756.364   1 
   0  -6  -2 22170.7 579.147   4 
   0  -6  -3 364.712 101.783   1 
   0  -6  -3 372.196 89.5098   4 
   0  -6  -4 7786.19 477.351   1 
   0   6   4 7470.46 459.691   1 
   0  -6  -4 7730.02 395.447   4 
   0   6   5 888.189 178.767   1 
   0  -6  -5 919.011 164.107   2 
   0  -6  -5 877.490 179.906   1 
   0  -6  -5 997.524 160.958   4 
   0  -6  -6 16098.4 750.941   1 
   0   6   6 17667.4 733.082   1 
   0  -6  -6 16954.8 669.595   2 
   0  -6  -7 11.0517 111.465   2 
   0  -6  -8-155.089 142.567   2 
   0  -6  -9 3044.04 370.581   2 
   0  -6 -10 616.409 206.961   2 
   0  -6 -11 297.457 161.662   2 
   0  -6 -12 198.482 153.288   2 
   0   7 -15 123.111 135.457   2 
   0   7 -14-202.892 143.582   2 
   0   7 -13-36.6893 138.315   2 
   0   7 -12-147.606 124.422   2 
   0   7 -11 454.791 151.083   2 
   0   7 -10 1044.42 216.989   2 
   0  -7   9 661.434 134.430   2 
   0   7  -9 670.458 159.693   2 
   0   7  -8 482.080 131.809   2 
   0   7  -8 337.336 133.751   1 
   0  -7   8 798.958 134.011   2 
   0  -7   7 2308.99 211.924   2 
   0   7  -7 2186.46 300.858   1 
   0   7  -7 2050.62 236.405   2 
   0  -7   6 1031.99 163.884   3 
   0  -7   6 1158.62 144.411   2 
   0   7  -6 1218.81 231.893   1 
   0   7  -6 1179.74 166.350   2 
   0   7  -5 3679.48 363.029   1 
   0  -7   5 3173.32 264.002   3 
   0  -7   5 3510.60 221.163   2 
   0   7  -5 3504.27 224.309   4 
   0  -7   4 2078.77 161.145   2 
   0   7  -4 1948.21 266.197   1 
   0   7  -4 2046.31 153.242   4 
   0  -7   3 32895.3 613.867   2 
   0   7  -3 33160.4 1005.64   1 
   0   7  -3 33258.0 515.236   4 
   0  -7   2 12073.2 381.127   2 
   0   7  -2 12891.5 620.710   1 
   0   7  -2 13400.8 303.154   4 
   0   7  -1-34.4257 95.8767   1 
   0   7  -1 30.3631 33.2333   4 
   0  -7   1 66.3022 37.4849   4 
   0  -7   1 51.1094 59.5018   1 
   0  -7   0 4435.27 238.289   4 
   0   7   0 4394.01 365.350   1 
   0   7   0 4499.15 204.981   4 
   0  -7   0 4947.34 360.831   1 
   0   7   1 872.564 184.679   1 
   0  -7  -1 822.762 117.541   4 
   0  -7  -1 768.292 155.025   1 
   0   7   1 736.379 103.896   4 
   0  -7  -2 2107.65 248.902   1 
   0   7   2 1702.47 237.428   1 
   0  -7  -2 1665.13 173.185   4 
   0  -7  -3 7961.06 398.180   4 
   0   7   3 8395.70 517.281   1 
   0  -7  -3 8749.13 517.093   1 
   0  -7  -4 2144.75 233.724   4 
   0  -7  -4 1527.04 225.902   1 
   0  -7  -4 1833.60 200.719   2 
   0   7   4 1868.99 266.743   1 
   0  -7  -5 606.164 167.714   1 
   0  -7  -5 441.888 129.192   4 
   0   7   5 569.914 160.126   1 
   0  -7  -5 711.622 156.798   2 
   0   7   6-21.4385 125.706   1 
   0  -7  -6-30.1940 102.903   2 
   0  -7  -7 326.217 146.418   2 
   0  -7  -8 160.542 105.646   2 
   0  -7  -9-72.0346 111.413   2 
   0  -7 -10 551.784 205.375   2 
   0  -7 -11-69.9314 159.073   2 
   0   8 -14 195.572 159.713   2 
   0   8 -13 447.594 196.240   2 
   0   8 -13 575.461 191.053   1 
   0   8 -12 101.439 96.6023   2 
   0   8 -12 435.456 196.205   1 
   0   8 -11-153.527 157.989   1 
   0   8 -11-8.90624 74.7470   2 
   0   8 -10 2214.50 352.288   1 
   0   8 -10 1925.29 288.846   2 
   0   8  -9 2943.21 320.163   2 
   0   8  -9 3296.12 423.875   1 
   0   8  -8-90.6512 178.797   1 
   0  -8   8 24.2013 52.7662   2 
   0   8  -8 8.75994 78.8623   2 
   0  -8   7 202.186 87.2742   2 
   0   8  -7 60.0140 152.054   1 
   0  -8   7-166.105 83.0265   3 
   0   8  -7 88.4970 71.1865   2 
   0   8  -7 9.83147 78.6877   4 
   0   8  -6 847.588 207.740   1 
   0  -8   6 1071.45 170.023   3 
   0  -8   6 904.823 128.036   2 
   0   8  -6 914.539 135.131   4 
   0   8  -5 2472.27 180.372   4 
   0  -8   5 2306.52 178.706   2 
   0  -8   5 2121.10 229.915   3 
   0   8  -5 2431.69 322.556   1 
   0   8  -4 2015.43 296.013   1 
   0   8  -4 1771.38 132.697   4 
   0  -8   4 1844.69 154.886   2 
   0   8  -3 11229.8 286.098   4 
   0  -8   3 11294.1 372.607   2 
   0   8  -3 12166.3 659.335   1 
   0  -8   2 2571.29 183.906   2 
   0   8  -2 2681.92 319.667   1 
   0   8  -2 2680.10 137.517   4 
   0   8  -1 411.828 61.0294   4 
   0   8  -1 395.173 141.830   1 
   0  -8   1 439.710 74.9473   4 
   0  -8   1 343.058 100.517   1 
   0  -8   1 393.730 81.6964   2 
   0   8   0 3094.78 182.945   4 
   0  -8   0 2922.24 297.997   1 
   0   8   0 2980.56 331.248   1 
   0  -8   0 3146.04 212.901   4 
   0  -8  -1 6713.00 460.677   1 
   0   8   1 6414.80 478.150   1 
   0  -8  -1 6660.98 333.583   4 
   0  -8  -2 10775.5 457.887   4 
   0  -8  -2 11416.6 601.189   1 
   0   8   2 11558.9 656.363   1 
   0  -8  -3 3509.67 281.880   4 
   0   8   3 3674.51 376.448   1 
   0   8   4 2612.09 326.813   1 
   0  -8  -4 2386.91 249.909   4 
   0  -8  -4 2352.98 242.391   2 
   0  -8  -5 12432.6 574.241   2 
   0   8   5 11747.1 673.384   1 
   0  -8  -6 309.610 131.128   2 
   0   8   6 273.200 148.558   1 
   0   8   7 116.140 109.046   1 
   0  -8  -7 137.961 103.709   2 
   0  -8  -8 0.49556 93.2205   2 
   0  -8  -9 230.812 135.274   2 
   0  -8 -10 100.295 114.102   2 
   0  -8 -11 247.735 181.690   2 
   0   9 -13-155.367 109.215   2 
   0   9 -12-96.1915 92.6023   2 
   0   9 -12-14.5017 117.437   1 
   0   9 -11 550.772 210.651   1 
   0   9 -11 510.055 157.612   2 
   0   9 -10 697.365 184.828   2 
   0   9 -10 1148.78 278.140   1 
   0   9  -9 492.561 147.614   2 
   0   9  -9 612.296 234.089   1 
   0   9  -8 157.691 119.982   1 
   0  -9   8 157.814 73.2887   2 
   0   9  -8 254.641 80.4317   4 
   0   9  -7 1149.90 158.473   4 
   0  -9   7 1515.76 175.011   2 
   0   9  -7 1335.88 292.528   1 
   0  -9   7 1519.83 209.986   3 
   0   9  -6 7049.41 317.433   4 
   0  -9   6 7629.98 350.559   2 
   0  -9   6 6995.99 428.500   3 
   0   9  -5 256.398 184.617   1 
   0  -9   5 427.417 85.2616   2 
   0   9  -5 366.502 67.1188   4 
   0  -9   5 252.334 96.9580   3 
   0  -9   4 1514.96 141.991   2 
   0   9  -4 1506.99 107.137   4 
   0   9  -4 1465.69 268.821   1 
   0  -9   3 1858.48 161.440   2 
   0   9  -3 1710.47 104.017   4 
   0   9  -3 1632.90 279.414   1 
   0   9  -2 51.0573 96.7881   1 
   0   9  -2 55.6740 30.3462   4 
   0  -9   2 19.6457 51.8586   2 
   0  -9   1 1005.89 128.687   2 
   0   9  -1 1088.14 234.517   1 
   0   9  -1 1222.07 106.628   4 
   0  -9   0 90.8599 38.5222   4 
   0   9   0 16.2182 137.808   1 
   0  -9  -1 1813.68 185.793   4 
   0   9   1 1661.19 276.281   1 
   0  -9  -2 10.1367 48.6564   4 
   0   9   2-80.8689 138.783   1 
   0  -9  -3 7404.86 396.704   2 
   0  -9  -3 7663.09 429.993   4 
   0   9   3 7484.99 562.188   1 
   0  -9  -4-5.28786 84.5637   2 
   0   9   4 44.8351 116.887   1 
   0  -9  -4 57.3438 82.1028   4 
   0   9   5 10.0122 131.074   1 
   0  -9  -5 30.1835 92.4853   2 
   0   9   6 382.119 175.395   1 
   0  -9  -6 133.987 105.789   2 
   0  -9  -7 243.645 138.835   2 
   0   9   7 451.836 181.187   1 
   0  -9  -8 483.539 174.840   2 
   0  -9  -9-14.6210 132.690   2 
   0  -9 -10-46.6463 143.061   2 
   0  10 -11 152.196 157.522   1 
   0  10 -10 219.054 152.231   1 
   0  10  -9 137.453 153.514   1 
   0  10  -8 732.123 254.139   1 
   0  10  -7 2447.90 373.261   1 
   0  10  -6 1134.28 263.919   1 
   0  10  -5 955.040 257.357   1 
   0 -10   5 747.490 155.814   3 
   0  10  -5 895.161 75.5344   4 
   0  10  -4 1626.31 78.0230   4 
   0  10  -4 1714.05 300.555   1 
   0 -10   4 2168.00 165.696   2 
   0 -10   3 2107.80 164.337   2 
   0  10  -3 1929.11 90.0566   4 
   0  10  -2 10366.4 697.552   1 
   0 -10   2 9546.93 370.663   2 
   0 -10   1 1835.42 175.273   2 
   0  10  -1 1925.23 323.344   1 
   0  10   0 61.7681 119.991   1 
   0 -10   0-56.4954 47.7895   4 
   0 -10  -1-96.0232 61.6935   4 
   0  10   1 211.863 132.077   1 
   0 -10  -2 1471.29 182.745   4 
   0  10   2 1830.70 301.557   1 
   0 -10  -3 855.374 149.677   2 
   0  10   3 816.623 211.810   1 
   0  10   4 1368.26 284.145   1 
   0 -10  -4 1117.99 187.029   2 
   0  10   5 670.442 211.419   1 
   0 -10  -5 1330.36 216.592   2 
   0 -10  -6 2183.34 282.129   2 
   0  10   6 2494.68 364.615   1 
   0 -10  -7 627.139 167.584   2 
   0  10   7 1671.07 310.892   1 
   0 -10  -8 944.504 212.074   2 
   0 -10  -9 358.860 156.898   2 
   0  11 -10 610.990 250.410   1 
   0  11  -9 271.810 207.033   1 
   0  11  -8 837.437 271.192   1 
   0  11  -7 166.545 171.775   1 
   0  11  -6 2856.30 424.662   1 
   0  11  -5 5056.98 554.706   1 
   0  11  -4-26.1789 135.733   1 
   0  11  -3 3892.61 472.433   1 
   0  11  -2 521.766 209.063   1 
   0  11  -1 4199.60 482.225   1 
   0  11   0 297.048 161.723   1 
   0 -11   0 290.563 74.2828   2 
   0  11   1 10.9227 120.529   1 
   0 -11  -2 191.374 88.6414   2 
   0  11   2 58.5689 133.614   1 
   0  11   3 1978.04 344.950   1 
   0 -11  -3 1546.08 208.191   2 
   0  11   4 231.561 178.314   1 
   0 -11  -4 41.5154 81.0708   2 
   0  11   5 256.630 168.609   1 
   0 -11  -5 466.085 141.152   2 
   0  11   6 414.042 181.905   1 
   0  11   7 948.297 265.978   1 
   0  12  -8 100.743 184.557   1 
   0  12  -7 221.532 215.296   1 
   0  12  -6 619.423 231.657   1 
   0  12  -5 1164.95 297.737   1 
   0  12  -4 1044.31 284.407   1 
   0  12  -3 31.5222 138.662   1 
   0  12  -2 1813.37 349.548   1 
   0  12  -1 1816.34 349.063   1 
   0  12   0-45.5011 152.832   1 
   0  12   1 7.67878 134.431   1 
   0  12   2 919.140 258.037   1 
   0  12   3-90.2059 129.143   1 
   0  12   4-223.540 175.275   1 
   0  12   5 16.1243 132.599   1 
   0  12   6-9.25292 112.030   1 
   0  13  -6-79.8716 172.567   1 
   0  13  -5 329.567 207.067   1 
   0  13  -4-386.277 210.461   1 
   0  13  -3 469.341 215.302   1 
   0  13  -2 1608.62 342.885   1 
   0  13  -1 72.4247 136.872   1 
   0  13   0 416.905 191.510   1 
   0  13   1 164.375 146.242   1 
   0  13   2 385.418 192.325   1 
   0  13   3-172.605 163.923   1 
   0  13   4 290.592 183.357   1 
   0  14  -3 27.6991 189.138   1 
   0  14  -2 821.783 286.349   1 
   0  14  -1 56.2603 192.912   1 
   0  14   0 599.837 246.052   1 
   0  14   1 328.682 203.441   1 
   0  14   2-8.31610 109.811   1 
  -1  14   0-191.920 207.609   1 
  -1  14  -1 529.460 257.004   1 
  -1  13   5 298.439 202.547   1 
  -1  13   4 336.921 221.496   1 
  -1  13   3 36.0674 137.136   1 
  -1  13   2 456.161 210.635   1 
  -1  13   1-246.112 188.806   1 
  -1  13   0 54.8831 136.888   1 
  -1  13  -1 277.086 176.141   1 
  -1  13  -2-246.570 224.998   1 
  -1  13  -3 4.53461 139.128   1 
  -1  13  -4 203.889 197.115   1 
  -1  13  -5 759.673 284.822   1 
  -1  13  -6-102.472 175.339   1 
  -1  12   7-16.7010 117.454   1 
  -1  12   6 29.6225 131.288   1 
  -1  12   5-249.819 177.017   1 
  -1  12   4 455.359 217.043   1 
  -1  12   3 202.514 160.815   1 
  -1  12   2 104.935 161.968   1 
  -1  12   1 533.867 236.838   1 
  -1  12   0 1985.35 367.102   1 
  -1  12  -1 1431.15 313.185   1 
  -1  12  -2 1218.77 279.478   1 
  -1  12  -3 3151.19 472.948   1 
  -1  12  -4 6631.42 660.211   1 
  -1  12  -5 2513.48 423.630   1 
  -1  12  -6 396.311 204.143   1 
  -1  12  -7 487.988 228.652   1 
  -1  12  -8 217.803 161.180   1 
  -1  11   8 404.514 213.978   1 
  -1  11   7 926.158 256.465   1 
  -1  11   6-23.9186 126.128   1 
  -1  11   5 1883.62 353.373   1 
  -1  11   4 828.255 226.123   1 
  -1  11   3-85.6006 163.302   1 
  -1  11   2 106.641 146.220   1 
  -1  11   1 223.299 137.406   1 
  -1  11   0 333.229 173.166   1 
  -1  11  -1 576.876 201.090   1 
  -1  11  -2 873.842 249.935   1 
  -1  11  -3 4687.29 524.404   1 
  -1  11  -4 2129.36 385.243   1 
  -1  11  -5 726.085 262.610   1 
  -1  11  -6 799.555 286.487   1 
  -1  11  -7 1395.28 315.721   1 
  -1  11  -8-2.51358 150.180   1 
  -1  11  -9 84.0331 150.611   1 
  -1  11 -10 1636.16 364.726   1 
   1 -10 -10 228.188 152.876   2 
   1 -10  -9 145.111 138.103   2 
  -1  10   8 968.872 263.395   1 
   1 -10  -8 252.019 142.053   2 
   1 -10  -7-19.4002 105.280   2 
  -1  10   7 198.611 135.992   1 
  -1  10   6 450.365 208.274   1 
   1 -10  -6 267.459 120.079   2 
  -1  10   5 683.368 190.659   1 
   1 -10  -5 1284.30 195.374   2 
  -1  10   4 338.240 184.728   1 
   1 -10  -4-25.6285 71.2874   2 
  -1  10   3-32.4739 130.005   1 
   1 -10  -2 1159.21 143.624   4 
   1 -10  -2 1350.18 145.963   2 
   1 -10  -1 5637.61 267.126   4 
   1 -10  -1 6155.88 269.098   2 
  -1  10   0-43.9192 147.082   1 
   1 -10   0 14.2981 24.9632   2 
   1 -10   0 52.1733 24.8883   2 
  -1  10  -1-52.2579 148.481   1 
  -1  10  -2 16031.1 879.990   1 
  -1  10  -3 15201.2 864.279   1 
  -1  10  -4-45.5283 125.881   1 
  -1  10  -5 15423.0 885.775   1 
   1 -10   5 15957.3 586.578   3 
  -1  10  -6 752.434 251.872   1 
  -1  10  -7 1720.72 325.084   1 
  -1  10  -8-61.2461 141.234   1 
  -1  10  -9 689.906 252.577   1 
  -1  10 -10 497.929 204.534   1 
  -1  10 -11-14.3778 171.470   1 
   1  -9 -11-36.1472 126.204   2 
   1  -9 -10 796.840 239.116   2 
   1  -9  -9 449.416 166.211   2 
   1  -9  -8 187.328 116.977   2 
   1  -9  -7 289.870 122.229   2 
  -1   9   7 255.012 167.354   1 
  -1   9   6 1482.29 291.391   1 
   1  -9  -6 1770.61 243.178   2 
   1  -9  -5 417.133 127.948   2 
  -1   9   5 110.505 143.069   1 
   1  -9  -4 703.435 133.920   2 
   1  -9  -4 663.197 127.856   4 
  -1   9   4 336.398 160.348   1 
   1  -9  -3 718.482 119.284   4 
  -1   9   3 599.157 199.620   1 
   1  -9  -2 8009.75 347.543   2 
  -1   9   2 8436.99 617.478   1 
   1  -9  -2 8195.63 359.686   4 
   1  -9  -1 3064.85 193.538   4 
   1  -9  -1 2982.24 185.896   2 
  -1   9   1 2600.81 348.624   1 
   1  -9   0 244.668 45.5881   4 
   1  -9   0 173.839 42.9275   2 
  -1   9  -1 3300.18 381.963   1 
   1  -9   1 3043.85 114.320   2 
   1  -9   1 3221.83 126.751   2 
  -1   9  -2 4058.18 425.205   1 
  -1   9  -3 3900.03 423.416   1 
   1  -9   4 2487.82 105.676   2 
  -1   9  -4 2725.68 367.209   1 
  -1   9  -5 1107.60 260.830   1 
   1  -9   5 961.172 91.6841   2 
   1  -9   5 737.146 130.267   3 
   1  -9   6 20311.2 626.768   3 
  -1   9  -6 19263.8 319.439   4 
  -1   9  -6 21360.4 1005.09   1 
  -1   9  -6 19327.7 363.345   4 
   1  -9   6 21296.7 480.966   2 
  -1   9  -7 60.4428 49.6730   4 
  -1   9  -7 189.751 180.563   1 
   1  -9   7 197.050 66.4352   2 
  -1   9  -8 842.801 155.357   2 
  -1   9  -8 872.116 230.313   1 
  -1   9  -9-75.5735 83.0288   2 
  -1   9  -9-269.832 159.084   1 
  -1   9 -10 78.1168 112.180   1 
  -1   9 -10-173.172 104.309   2 
  -1   9 -11 824.468 248.597   1 
  -1   9 -11 530.520 166.002   2 
  -1   9 -12 937.645 285.003   1 
   1  -8 -11 1093.14 273.864   2 
   1  -8 -10 5044.05 490.905   2 
   1  -8  -9 884.836 215.141   2 
   1  -8  -8 512.145 158.747   2 
   1  -8  -7 8051.33 510.386   2 
  -1   8   7 7168.79 570.360   1 
  -1   8   6 13080.5 753.915   1 
   1  -8  -6 12428.7 596.332   2 
  -1   8   5 25310.0 1027.90   1 
   1  -8  -5 25352.7 787.892   2 
   1  -8  -5 24765.0 759.077   4 
   1  -8  -4 264.500 96.2520   4 
  -1   8   4 239.719 159.128   1 
   1  -8  -3 8565.99 386.199   4 
  -1   8   3 9169.53 607.193   1 
   1  -8  -2 16835.1 494.019   4 
   1  -8  -2 17017.3 480.238   2 
   1  -8  -1 9012.15 301.561   2 
   1  -8  -1 8693.56 313.965   4 
  -1   8   1 8250.36 559.261   1 
   1  -8   0 22.8848 24.4625   4 
   1  -8   0 39.0692 27.9081   2 
  -1   8   0 12.8674 117.074   1 
  -1   8  -1 1287.76 238.763   1 
   1  -8   1 1352.28 74.1981   2 
   1  -8   1 1435.29 85.4734   2 
  -1   8  -2 2075.50 279.841   1 
  -1   8  -3 11035.3 639.545   1 
   1  -8   3 10611.2 190.620   2 
   1  -8   4 20156.9 351.007   2 
  -1   8  -4 20667.8 883.806   1 
   1  -8   4 20692.7 596.327   3 
   1  -8   5 645.945 110.781   3 
   1  -8   5 724.623 89.6906   2 
  -1   8  -5 706.251 69.4485   4 
  -1   8  -5 971.643 217.312   1 
  -1   8  -5 746.356 61.9365   4 
  -1   8  -6 585.905 114.336   2 
  -1   8  -6 670.221 203.216   1 
  -1   8  -6 503.180 81.2701   4 
  -1   8  -6 750.649 85.5536   4 
   1  -8   6 799.055 106.573   2 
  -1   8  -7 7453.90 299.348   4 
  -1   8  -7 7933.97 595.339   1 
  -1   8  -7 7221.43 398.452   2 
   1  -8   7 7909.68 350.880   2 
  -1   8  -8 7072.49 329.140   4 
  -1   8  -8 7110.02 583.541   1 
   1  -8   8 7332.89 371.924   2 
  -1   8  -8 6964.40 425.323   2 
  -1   8  -9 2104.17 342.056   1 
  -1   8  -9 2128.93 255.892   2 
  -1   8 -10-23.2658 105.479   2 
  -1   8 -10 149.116 111.747   1 
  -1   8 -11 487.243 210.626   1 
  -1   8 -11 483.062 153.737   2 
  -1   8 -12 318.637 155.547   2 
  -1   8 -12 400.298 183.139   1 
  -1   8 -13-180.016 113.170   2 
  -1   8 -13 210.484 176.229   1 
  -1   8 -14 81.6152 121.542   2 
   1  -7 -12 129.677 140.343   2 
   1  -7 -11 597.215 220.765   2 
   1  -7 -10 72.3218 118.077   2 
   1  -7  -9 59.6048 112.594   2 
   1  -7  -8 437.383 139.693   2 
   1  -7  -7 44.3814 107.024   2 
  -1   7   7-69.8090 168.612   1 
  -1   7   6 629.374 177.422   1 
   1  -7  -6 1038.25 184.848   2 
   1  -7  -5 1304.54 178.472   4 
  -1   7   5 1240.28 253.616   1 
   1  -7  -5 1293.69 194.510   2 
  -1   7   4 1009.37 212.941   1 
   1  -7  -4 1446.13 180.354   4 
   1  -7  -3 15020.2 698.163   1 
   1  -7  -3 14306.9 468.726   4 
   1  -7  -3 13814.2 472.411   2 
  -1   7   3 13252.2 670.695   1 
   1  -7  -2 5227.59 406.663   1 
  -1   7   2 5698.48 448.078   1 
   1  -7  -2 5091.18 253.479   2 
   1  -7  -2 5078.80 256.009   4 
   1  -7  -1 177.593 98.4836   1 
   1  -7  -1 103.160 31.3006   4 
   1  -7  -1 173.254 50.9959   2 
  -1   7   1 181.199 114.094   1 
  -1   7   0 935.748 183.639   1 
   1  -7   0 872.235 73.8645   2 
   1  -7   0 855.973 159.163   1 
   1  -7   0 858.560 75.9378   4 
   1  -7   1 67.8081 18.9166   2 
   1  -7   1 13.3612 79.8369   1 
   1  -7   1 44.9749 18.0323   2 
   1  -7   2 1016.51 169.223   1 
   1  -7   3 105.313 23.0156   2 
  -1   7  -4 15.5257 13.5873   4 
  -1   7  -4 11.9829 16.4047   4 
   1  -7   4-19.0558 26.5715   2 
   1  -7   4 24.2525 47.0247   3 
  -1   7  -5-25.3811 42.2542   2 
   1  -7   5 8.21574 51.3136   3 
  -1   7  -5 38.1437 107.320   1 
  -1   7  -5 34.2451 30.0969   4 
   1  -7   5 19.9341 31.5437   2 
  -1   7  -6 7562.91 371.473   2 
  -1   7  -6 8025.87 287.895   4 
  -1   7  -6 7862.00 536.830   1 
   1  -7   6 8046.20 326.186   2 
   1  -7   7 5.59603 52.7516   2 
  -1   7  -7 49.7128 44.7095   4 
  -1   7  -7-14.8462 118.449   1 
  -1   7  -7-12.7096 68.0778   2 
  -1   7  -8 1645.15 226.601   2 
   1  -7   8 1963.53 198.431   2 
  -1   7  -8 1731.48 174.723   4 
  -1   7  -8 1530.16 272.739   1 
  -1   7  -9 1474.98 270.413   1 
  -1   7  -9 1426.18 217.192   2 
  -1   7  -9 1486.77 177.883   4 
  -1   7 -10 942.774 193.871   2 
  -1   7 -10 715.582 201.563   1 
  -1   7 -11 1686.36 316.634   1 
  -1   7 -11 1465.01 258.556   2 
  -1   7 -12 60.6538 104.247   2 
  -1   7 -13 71.0792 97.3573   2 
  -1   7 -14 332.557 178.507   2 
  -1   7 -15 1068.77 292.859   2 
   1  -6 -12 140.352 147.359   2 
   1  -6 -11 575.105 217.405   2 
   1  -6 -10 61.3731 116.110   2 
   1  -6  -9 1480.36 255.261   2 
   1  -6  -8 2895.15 322.873   2 
   1  -6  -7 284.256 102.057   2 
   1  -6  -6 280.531 116.029   2 
   1  -6  -6-12.4549 109.672   4 
  -1   6   6 115.032 121.233   1 
   1  -6  -5 23508.7 898.636   1 
   1  -6  -5 23439.2 678.941   4 
  -1   6   5 23900.7 877.820   1 
  -1   6   4 812.743 189.752   1 
   1  -6  -4 888.640 129.557   4 
   1  -6  -4 731.304 155.166   1 
  -1   6   3 9531.11 529.250   1 
   1  -6  -3 9513.71 375.687   2 
   1  -6  -3 9325.31 355.044   4 
   1  -6  -3 10355.1 549.153   1 
   1  -6  -2 20407.4 476.817   2 
   1  -6  -2 20107.5 742.666   1 
   1  -6  -2 19880.2 462.908   4 
   1  -6  -1 17244.1 369.447   2 
   1  -6  -1 18098.8 678.466   1 
   1  -6  -1 17616.7 383.034   4 
   1  -6   0 36923.5 443.875   4 
   1  -6   0 38565.7 426.550   2 
   1  -6   1 12820.7 552.883   1 
   1  -6   2 671.428 130.621   1 
   1  -6   3-5.99836 21.0074   2 
   1  -6   4 634.749 89.1962   3 
   1  -6   4 731.074 78.4847   2 
  -1   6  -4 600.340 84.8685   2 
  -1   6  -4 534.343 55.7828   4 
  -1   6  -5 14721.8 356.900   4 
   1  -6   5 14793.2 400.596   2 
  -1   6  -5 13784.9 440.798   2 
   1  -6   6 3068.22 209.042   2 
  -1   6  -6 3074.95 319.616   1 
  -1   6  -6 3565.23 253.645   2 
  -1   6  -6 3332.56 199.974   4 
  -1   6  -7 102.612 87.6389   2 
  -1   6  -7 159.000 56.0132   4 
   1  -6   7 105.193 56.9028   2 
  -1   6  -8 324.394 89.2589   4 
   1  -6   8 372.935 101.444   2 
  -1   6  -8 264.048 121.354   1 
  -1   6  -8 397.683 119.520   2 
  -1   6  -9 1422.72 211.300   2 
  -1   6  -9 1262.89 169.501   4 
  -1   6 -10-49.7739 119.528   2 
  -1   6 -11 198.055 115.215   2 
  -1   6 -12 111.541 106.431   3 
  -1   6 -12 154.577 124.365   2 
  -1   6 -13 753.996 221.783   3 
  -1   6 -13 805.065 231.251   2 
  -1   6 -14 584.769 212.546   3 
  -1   6 -14 1044.87 249.454   2 
  -1   6 -15 307.994 157.096   2 
  -1   6 -15 5.47008 127.787   3 
   1  -5 -13 182.212 150.141   2 
   1  -5 -12 254.945 161.183   2 
   1  -5 -11 157.793 130.169   2 
   1  -5 -10 2349.12 317.170   2 
   1  -5  -9 636.913 180.780   2 
   1  -5  -8 773.465 182.553   2 
   1  -5  -7 685.672 162.249   2 
  -1   5   6-85.1311 135.659   1 
   1  -5  -6 44.9491 78.0785   1 
   1  -5  -6-71.5968 72.3768   4 
   1  -5  -6-93.2943 100.802   2 
  -1   5   5 1154.37 191.152   1 
   1  -5  -5 1116.23 147.520   4 
   1  -5  -5 1209.90 197.291   1 
   1  -5  -4 8276.02 353.250   4 
   1  -5  -4 8661.82 385.903   2 
   1  -5  -4 8645.71 490.055   1 
   1  -5  -3 17159.7 666.004   1 
   1  -5  -3 16062.2 439.362   4 
   1  -5  -3 16181.2 468.583   2 
   1  -5  -2-15.2725 33.5685   4 
   1  -5  -2 0.89781 35.9742   2 
   1  -5  -2-38.1372 58.6500   1 
   1  -5  -1 1016.75 84.6034   4 
   1  -5  -1 1058.69 86.8480   2 
   1  -5  -1 1033.27 155.043   1 
   1  -5   0 12228.9 210.857   2 
   1  -5   0 12100.2 499.484   1 
   1  -5   0 11936.5 217.332   4 
   1  -5   1 36006.4 842.769   1 
   1  -5   2 17337.3 578.387   1 
  -1   5  -3 94.2967 23.4588   4 
   1  -5   3 147.425 35.5074   2 
   1  -5   3 85.9749 36.7253   3 
  -1   5  -3 106.538 36.4370   2 
   1  -5   4 15189.3 358.044   2 
  -1   5  -4 15242.5 318.380   4 
  -1   5  -4 16019.1 404.204   2 
   1  -5   5 7753.63 300.118   2 
  -1   5  -5 7840.76 324.907   2 
  -1   5  -5 8554.76 289.502   4 
  -1   5  -6 1062.75 142.810   2 
  -1   5  -6 1088.74 195.892   1 
   1  -5   6 1036.11 126.448   2 
  -1   5  -6 1077.17 124.131   4 
  -1   5  -7 1430.96 157.637   4 
   1  -5   7 1469.73 167.869   2 
  -1   5  -7 1379.43 181.734   3 
  -1   5  -7 1223.55 164.957   2 
  -1   5  -8 2341.63 245.725   3 
  -1   5  -8 2304.89 246.117   2 
   1  -5   8 2480.82 232.794   2 
  -1   5  -8 2326.63 213.499   4 
  -1   5  -9 299.435 112.742   3 
  -1   5  -9 233.018 97.1401   2 
  -1   5  -9 201.873 94.2508   4 
  -1   5 -10 511.916 140.513   2 
  -1   5 -10 435.719 135.351   3 
  -1   5 -11 64.9391 78.4416   3 
  -1   5 -11-31.9428 85.6660   2 
  -1   5 -12 1703.13 282.972   3 
  -1   5 -12 1774.42 288.545   2 
  -1   5 -13-145.272 119.901   3 
  -1   5 -13-286.047 144.948   2 
  -1   5 -14 45.8030 135.197   2 
  -1   5 -14 290.725 163.750   3 
  -1   5 -15 146.995 147.172   3 
  -1   5 -15 214.633 108.672   2 
   1  -4 -13 491.995 204.866   2 
   1  -4 -12 1066.15 245.945   2 
   1  -4 -11 506.587 205.690   2 
   1  -4 -10 1140.38 244.915   2 
   1  -4  -9 174.342 134.614   2 
   1  -4  -8 2546.87 293.233   2 
   1  -4  -7 2204.53 235.654   4 
   1  -4  -7 1994.79 237.025   2 
   1  -4  -7 2215.45 273.863   1 
   1  -4  -6 82.8697 66.3534   1 
   1  -4  -6 15.8247 77.5224   2 
   1  -4  -6 23.4932 47.5386   4 
   1  -4  -5 2589.55 269.691   1 
   1  -4  -5 2476.60 208.529   4 
   1  -4  -4 418.358 110.814   1 
   1  -4  -4 360.181 89.8063   2 
   1  -4  -3 42347.8 696.724   4 
   1  -4  -3 44165.4 975.619   1 
   1  -4  -3 42895.9 721.129   2 
   1  -4  -2 21393.6 424.922   4 
   1  -4  -2 21683.7 660.515   1 
   1  -4  -2 20718.3 431.784   2 
   1  -4  -1 135086. 852.169   4 
   1  -4  -1 133235. 870.081   2 
   1  -4   0 29643.3 282.089   4 
   1  -4   0 31781.2 723.439   1 
   1  -4   1 27980.1 673.904   1 
   1  -4   2 10760.4 181.356   2 
  -1   4  -2 11091.1 207.007   2 
  -1   4  -3 68990.3 576.857   4 
   1  -4   3 69424.2 644.573   2 
  -1   4  -3 68345.0 681.048   2 
  -1   4  -4 152794. 1096.56   4 
   1  -4   4 154931. 1191.02   2 
  -1   4  -5 116831. 1115.41   4 
   1  -4   5 110865. 1164.18   2 
  -1   4  -5 117148. 1267.04   3 
  -1   4  -5 112986. 1212.22   2 
   1  -4   6 37.1597 64.6378   2 
  -1   4  -6 40.1902 68.0868   3 
  -1   4  -6 71.1340 56.8231   4 
  -1   4  -6 120.675 78.2078   2 
  -1   4  -7 35309.6 837.697   2 
   1  -4   7 36210.3 813.416   2 
  -1   4  -7 36237.0 786.853   4 
  -1   4  -7 35377.0 860.397   3 
  -1   4  -8 33094.7 884.545   2 
  -1   4  -8 32092.4 899.109   3 
  -1   4  -8 32438.3 805.114   4 
  -1   4  -9 13529.7 620.746   2 
  -1   4  -9 14558.0 643.620   3 
  -1   4  -9 14483.2 575.483   4 
  -1   4 -10 1047.57 194.462   2 
  -1   4 -10 1465.96 235.630   3 
  -1   4 -11 1306.01 238.159   3 
  -1   4 -11 957.568 209.833   2 
  -1   4 -12 593.657 180.318   3 
  -1   4 -12 743.332 196.458   2 
  -1   4 -13 144.118 123.591   3 
  -1   4 -13-21.9888 127.027   2 
  -1   4 -14 1568.09 304.798   3 
  -1   4 -14 1148.03 280.157   2 
  -1   4 -15 88.3502 133.907   3 
   1  -3 -13 82.8417 108.855   2 
   1  -3 -12 986.286 248.865   2 
   1  -3 -11 112.509 169.282   2 
   1  -3 -10 1320.36 246.901   2 
   1  -3  -9 4294.06 386.918   2 
   1  -3  -8 11643.8 587.384   2 
   1  -3  -8 11122.7 620.457   1 
   1  -3  -7 3016.66 286.074   2 
   1  -3  -7 2796.84 298.789   1 
   1  -3  -7 3227.31 271.837   4 
  -1   3   6 108.972 66.2654   2 
   1  -3  -6 145.801 56.8975   4 
   1  -3  -6 14.0153 89.4266   1 
  -1   3   5 2794.81 217.768   2 
   1  -3  -5 2879.28 267.697   1 
   1  -3  -4 31718.2 688.906   2 
  -1   3   4 33372.0 672.993   2 
   1  -3  -4 32560.1 825.235   1 
   1  -3  -3 4112.42 218.008   2 
  -1   3   3 4103.61 209.164   2 
   1  -3  -3 4108.97 279.270   1 
   1  -3  -2 2370.70 141.585   2 
   1  -3  -2 2171.20 191.796   1 
  -1   3   2 2372.14 134.614   2 
   1  -3  -1 34282.6 703.157   1 
   1  -3  -1 33230.4 402.892   2 
  -1   3   1 34078.9 392.333   2 
   1  -3   0 143620. 1361.70   1 
   1  -3   1 8502.20 325.328   1 
  -1   3  -2 5610.77 140.590   4 
   1  -3   2 5733.74 146.327   3 
  -1   3  -2 5748.55 152.496   2 
  -1   3  -3 76.0066 30.7131   3 
  -1   3  -3 39.7880 28.0417   2 
  -1   3  -3 29.3291 20.4355   4 
  -1   3  -4 298.414 68.9952   2 
   1  -3   4 343.493 65.1326   2 
  -1   3  -4 301.520 62.7463   3 
  -1   3  -4 377.303 65.9224   4 
  -1   3  -5 2256.14 187.945   2 
  -1   3  -5 2249.99 179.309   3 
  -1   3  -5 2818.07 187.005   4 
   1  -3   5 2226.01 175.210   2 
  -1   3  -6 4422.08 280.116   2 
  -1   3  -6 4736.40 265.714   4 
  -1   3  -6 4737.44 283.473   3 
  -1   3  -7 14250.8 503.795   4 
  -1   3  -7 13890.9 542.258   2 
  -1   3  -8 116.900 75.5018   4 
  -1   3  -8 203.987 115.986   2 
  -1   3  -9 751.532 174.240   2 
  -1   3 -10 4932.15 415.971   3 
  -1   3 -10 3783.67 367.235   2 
  -1   3 -11 1595.74 255.596   3 
  -1   3 -11 1700.92 271.517   2 
  -1   3 -12 10.9203 94.3984   2 
  -1   3 -12-29.3985 122.214   3 
  -1   3 -13 977.801 240.410   3 
  -1   3 -13 896.827 226.530   2 
  -1   3 -14 576.300 201.842   3 
  -1   3 -14 606.342 215.004   2 
  -1   3 -15 280.498 152.342   3 
   1  -2 -14 187.851 164.508   2 
   1  -2 -13 649.173 222.075   2 
   1  -2 -12 2854.62 387.456   2 
   1  -2 -11 6689.40 540.947   2 
   1  -2 -10 9650.67 603.578   2 
   1  -2  -9 7154.76 489.113   2 
   1  -2  -8 435.899 146.547   2 
   1  -2  -8 484.474 148.685   1 
  -1   2   7 4416.27 314.495   2 
   1  -2  -7 4713.91 366.176   1 
  -1   2   6 6732.90 360.543   2 
   1  -2  -6 6812.27 410.170   1 
  -1   2   5 24997.7 631.627   2 
   1  -2  -5 25298.3 727.480   1 
  -1   2   4 140157. 1341.12   2 
   1  -2  -4 136036. 1562.14   1 
   1  -2  -3 2359.51 188.633   1 
  -1   2   3 2385.10 155.461   2 
  -1   2   2 73333.3 726.461   2 
   1  -2  -2 75813.0 967.626   1 
  -1   2   1 256847. 1050.84   2 
   1  -2  -1 259340. 1669.89   1 
   1  -2   0 15075.6 378.302   1 
  -1   2  -1 13050.8 204.987   4 
   1  -2   1 13111.1 337.217   1 
  -1   2  -2 9818.38 221.690   2 
  -1   2  -2 9483.28 214.634   4 
   1  -2   2 9335.34 208.092   4 
  -1   2  -3 2926.46 154.116   2 
  -1   2  -3 2556.93 135.832   4 
  -1   2  -4 51410.1 706.040   4 
  -1   2  -4 49348.4 749.241   2 
  -1   2  -5 55979.2 837.340   4 
  -1   2  -5 54110.3 891.610   2 
  -1   2  -6 11620.9 459.849   2 
  -1   2  -6 11780.4 433.509   4 
  -1   2  -7 9167.87 416.705   4 
  -1   2  -7 10524.7 479.909   2 
  -1   2  -8 19827.4 653.790   4 
  -1   2  -8 18319.2 687.224   2 
  -1   2  -9 3507.64 337.406   2 
  -1   2 -10 45289.1 1231.55   2 
  -1   2 -11 862.634 203.646   2 
  -1   2 -12 3306.91 392.440   2 
  -1   2 -13 3025.96 397.314   2 
  -1   2 -14 819.008 246.642   2 
  -1   2 -14 774.038 225.834   3 
  -1   2 -15 631.909 230.717   3 
   1  -1 -14 368.693 179.451   3 
   1  -1 -14-2.24573 148.172   2 
   1  -1 -13 2540.17 388.061   2 
   1  -1 -12 250.454 154.706   2 
   1  -1 -11-69.0641 137.076   2 
   1  -1 -10 458.087 178.221   2 
   1  -1  -9 267.130 129.993   2 
   1  -1  -8 18363.0 733.916   1 
  -1   1   8 18476.9 673.425   2 
   1  -1  -8 17502.7 698.294   2 
  -1   1   7 60598.7 1146.06   2 
   1  -1  -7 62861.5 1269.52   1 
  -1   1   6 17857.0 577.325   2 
   1  -1  -6 18425.7 637.571   1 
   1  -1  -5 17872.5 577.496   1 
  -1   1   5 17414.4 525.765   2 
  -1   1   4 1507.11 140.196   2 
   1  -1  -4 1605.45 162.096   1 
   1  -1  -3 1146.00 125.425   1 
  -1   1   3 1017.51 103.516   2 
   1  -1  -2 5799.68 237.698   1 
  -1   1   2 5627.79 199.437   2 
  -1   1   1 90728.2 671.716   2 
  -1   1   0 3605.36 124.876   4 
  -1   1  -1 3860.14 136.520   4 
  -1   1  -2 220641. 1182.29   4 
  -1   1  -3 16578.2 371.666   4 
  -1   1  -4 25.6022 41.0292   4 
  -1   1  -4 41.4445 49.8464   2 
  -1   1  -5 48587.2 821.660   4 
  -1   1  -5 48396.9 865.827   2 
  -1   1  -6 64424.2 1105.35   2 
  -1   1  -6 62939.7 1018.89   4 
  -1   1  -7 16187.1 610.935   2 
  -1   1  -7 15454.9 552.276   4 
  -1   1  -8-27.0972 63.8324   4 
  -1   1  -8-163.943 129.322   2 
  -1   1  -9 12.5658 105.326   2 
  -1   1 -10 13178.6 681.468   2 
  -1   1 -11 2131.11 310.852   2 
  -1   1 -12 1574.81 291.130   2 
  -1   1 -13-308.785 173.519   2 
  -1   1 -14 508.580 208.661   2 
   1   0 -14 644.522 222.495   2 
   1   0 -14 706.402 242.826   3 
   1   0 -13 826.189 240.740   3 
   1   0 -13 551.120 217.793   2 
   1   0 -12 38.0593 113.720   2 
   1   0 -12-149.316 170.879   3 
   1   0 -11-36.1566 106.335   2 
   1   0 -10 3982.29 383.177   2 
   1   0  -9 5429.96 416.054   2 
  -1   0   8 11427.3 532.209   2 
  -1   0   7 17635.7 617.431   2 
  -1   0   6 22563.0 644.120   2 
  -1   0   5 97415.7 1223.29   2 
  -1   0   4 138561. 1308.68   2 
  -1   0   3 1064.97 103.737   2 
  -1   0   2 202867. 1253.64   3 
  -1   0   2 201999. 1224.80   2 
  -1   0  -1 3128.85 143.241   4 
  -1   0  -2 4820.17 195.466   4 
  -1   0  -3 6590.62 258.822   4 
  -1   0  -4 34149.0 648.719   4 
  -1   0  -5 9732.90 383.264   4 
  -1   0  -6 6971.62 353.773   4 
  -1   0  -7 966.003 148.189   4 
  -1   0  -8 1197.89 204.679   2 
  -1   0  -9 34888.9 1054.32   2 
  -1   0 -10 151.321 116.014   2 
  -1   0 -11 864.119 223.731   2 
  -1   0 -12-70.1069 91.7235   2 
  -1   0 -13 401.746 193.198   2 
  -1   0 -14 420.886 182.858   2 
   1   1 -15 1130.29 295.788   3 
   1   1 -14 244.183 174.696   3 
   1   1 -14 60.8662 107.072   2 
   1   1 -13 366.173 167.705   2 
   1   1 -13 32.6326 140.363   3 
   1   1 -12 7.63412 134.783   2 
   1   1 -12 43.0034 166.048   3 
   1   1 -11 3894.04 420.021   3 
   1   1 -11 4886.07 455.207   2 
   1   1 -10 2298.33 311.313   3 
   1   1 -10 2646.33 314.931   2 
   1   1  -9 18801.0 790.927   3 
   1   1  -9 16613.9 718.905   2 
  -1  -1   8 531.777 129.362   2 
   1   1  -8 501.022 151.191   3 
   1   1  -8 558.651 154.651   2 
  -1  -1   7 3308.60 270.782   2 
   1   1  -7 3321.58 299.215   3 
  -1  -1   6 4689.31 293.314   2 
  -1  -1   5 538.633 104.835   2 
  -1  -1   4 23970.8 544.164   2 
  -1  -1   3 196509. 1461.63   3 
  -1  -1   3 192468. 1402.70   2 
  -1  -1   2 348752. 1814.06   3 
  -1  -1   2 351601. 1768.15   2 
  -1  -1   1 175734. 1191.50   2 
  -1  -1  -1 14410.0 340.534   4 
  -1  -1  -2 686150. 2529.17   4 
  -1  -1  -2 679885. 1882.92   1 
  -1  -1  -3 13440.4 396.974   4 
  -1  -1  -3 13375.7 325.821   1 
  -1  -1  -4 73350.9 1015.35   4 
  -1  -1  -5 5009.61 288.365   4 
  -1  -1  -6 4892.68 310.907   4 
  -1  -1  -7 3841.64 297.019   4 
  -1  -1  -8 2209.56 241.826   1 
  -1  -1  -8 1834.17 240.857   2 
  -1  -1  -9 5606.18 437.121   2 
  -1  -1  -9 5291.08 401.872   1 
  -1  -1 -10 1162.94 224.406   2 
  -1  -1 -11 123.238 144.591   2 
  -1  -1 -12 234.607 162.754   2 
  -1  -1 -13 243.655 177.538   2 
   1   2 -15-38.3815 118.812   2 
   1   2 -15-160.178 143.088   3 
   1   2 -14 122.320 103.180   3 
   1   2 -14 0.74066 119.639   2 
   1   2 -13 521.285 189.565   3 
   1   2 -13 1114.36 275.086   2 
   1   2 -12 5467.15 522.573   3 
   1   2 -12 4268.69 450.901   2 
   1   2 -11-16.7099 106.130   2 
   1   2 -11-95.6693 134.555   3 
   1   2 -10 3558.23 361.958   2 
   1   2 -10 4667.80 427.443   3 
   1   2  -9 2281.79 300.660   3 
   1   2  -9 1725.69 241.455   2 
  -1  -2   8 206.913 88.4816   2 
   1   2  -8 41.8818 80.4691   2 
   1   2  -8 68.7843 96.6043   3 
  -1  -2   7 2498.03 233.896   2 
   1   2  -7 2506.80 252.049   2 
   1   2  -7 2724.40 273.764   3 
   1   2  -6 20147.0 674.532   3 
  -1  -2   6 20756.8 612.086   2 
   1   2  -6 19836.2 638.167   2 
  -1  -2   5 6317.55 311.616   2 
   1   2  -5 6197.36 349.031   3 
   1   2  -5 6597.86 343.310   2 
  -1  -2   4 11599.0 385.734   2 
   1   2  -4 11732.0 423.029   2 
  -1  -2   4 11803.9 409.656   3 
   1   2  -3 2038.21 165.175   2 
  -1  -2   3 2056.06 156.470   2 
  -1  -2   3 2140.39 165.825   3 
  -1  -2   2 333.688 65.9952   2 
   1   2  -1 291558. 1628.57   4 
  -1  -2   1 290175. 1605.86   4 
  -1  -2   0 859984. 2793.61   4 
  -1  -2  -1 999999. 3139.35   4 
  -1  -2  -2 251858. 1405.16   1 
   1   2   2 251586. 1352.65   1 
  -1  -2  -3 5282.02 233.470   1 
  -1  -2  -3 5234.79 263.613   4 
  -1  -2  -4 28128.3 613.089   1 
  -1  -2  -4 27517.1 662.466   4 
  -1  -2  -5 127207. 1436.58   1 
  -1  -2  -5 129249. 1519.65   4 
  -1  -2  -6 126.314 64.8451   4 
  -1  -2  -6 43.2458 56.3009   1 
  -1  -2  -7 664.404 140.822   1 
  -1  -2  -7 611.001 155.492   2 
  -1  -2  -7 588.515 126.349   4 
  -1  -2  -8 515.098 151.225   2 
  -1  -2  -8 423.534 132.119   1 
  -1  -2  -9 4539.36 407.204   2 
  -1  -2  -9 4709.07 387.536   1 
  -1  -2 -10 141.206 143.437   2 
  -1  -2 -11-88.2242 124.697   2 
  -1  -2 -12 669.612 197.187   2 
  -1  -2 -13 14.7196 152.070   2 
   1   3 -15 121.550 151.483   2 
   1   3 -15-67.6087 122.197   3 
   1   3 -14 335.342 176.448   2 
   1   3 -14 130.128 164.033   3 
   1   3 -13 2512.24 389.629   3 
   1   3 -13 2840.23 399.266   2 
   1   3 -12 261.816 149.285   2 
   1   3 -12 119.780 126.783   3 
   1   3 -11 13189.4 771.416   3 
   1   3 -11 12870.3 728.494   2 
   1   3 -10 1210.18 232.907   2 
   1   3 -10 808.952 204.427   3 
   1   3  -9 2591.84 311.719   3 
   1   3  -9 2519.99 304.749   2 
   1   3  -8 1498.85 218.885   2 
  -1  -3   8 1182.02 173.162   2 
   1   3  -8 1247.00 204.963   3 
  -1  -3   7 20120.5 653.545   2 
   1   3  -7 20834.4 746.176   3 
   1   3  -7 20774.8 721.085   2 
   1   3  -6 43177.4 1005.86   3 
   1   3  -6 43716.1 976.049   2 
  -1  -3   6 43724.5 882.802   2 
  -1  -3   5 47600.1 856.358   2 
   1   3  -5 47880.7 958.636   2 
  -1  -3   5 47400.2 923.940   3 
   1   3  -4 4660.59 283.183   2 
  -1  -3   4 4862.95 281.280   3 
  -1  -3   4 4296.73 247.131   2 
  -1  -3   3 45859.4 776.336   2 
   1   3  -3 46079.4 805.581   2 
   1   3  -2 41497.3 677.803   4 
  -1  -3   2 40830.0 705.914   2 
  -1  -3   1 82.9637 41.8684   4 
   1   3  -1 352.458 80.1265   4 
  -1  -3   0 89417.9 882.188   1 
   1   3   0 89549.2 936.448   1 
  -1  -3   0 89053.5 979.504   4 
  -1  -3  -1 74165.4 836.255   1 
   1   3   1 75326.2 885.607   1 
  -1  -3  -1 72803.7 929.674   4 
   1   3   1 72654.5 865.747   4 
   1   3   2 380.124 87.5224   4 
  -1  -3  -2 407.515 79.6789   4 
  -1  -3  -2 464.974 80.9778   1 
   1   3   2 513.750 83.1822   1 
   1   3   3 34553.3 688.382   4 
   1   3   3 34080.5 643.506   1 
  -1  -3  -3 34285.6 728.329   4 
  -1  -3  -3 32611.2 661.017   1 
  -1  -3  -4 79314.9 1131.57   1 
  -1  -3  -4 79725.7 1180.62   4 
   1   3   5 17379.7 579.448   4 
  -1  -3  -5 17252.4 574.257   1 
  -1  -3  -5 16809.3 582.885   4 
  -1  -3  -6 7670.30 419.530   4 
  -1  -3  -6 7155.49 420.965   2 
  -1  -3  -6 7524.79 407.691   1 
  -1  -3  -7 158.692 97.1633   1 
  -1  -3  -7 163.760 84.6959   2 
  -1  -3  -8 644.484 157.188   2 
  -1  -3  -8 705.299 153.031   1 
  -1  -3  -9-6.49017 113.709   2 
  -1  -3  -9 59.0534 80.2145   1 
  -1  -3 -10 1788.20 288.197   2 
  -1  -3 -11 1079.20 244.000   2 
  -1  -3 -12-23.6078 143.432   2 
  -1  -3 -13-64.7040 131.036   2 
   1   4 -15-48.9541 150.642   3 
   1   4 -15-5.14980 102.549   2 
   1   4 -14 251.806 180.134   2 
   1   4 -14 264.073 149.272   3 
   1   4 -13 261.584 197.892   2 
   1   4 -13 26.3263 147.072   3 
   1   4 -12 126.640 154.461   3 
   1   4 -12 357.221 207.258   2 
   1   4 -11 776.495 199.310   2 
   1   4 -11 951.553 231.507   3 
   1   4 -10 4010.68 409.051   3 
   1   4 -10 5347.90 457.235   2 
   1   4  -9 5582.59 453.561   3 
   1   4  -9 6490.99 469.488   2 
  -1  -4   8 12257.0 543.032   2 
   1   4  -8 10892.7 578.712   2 
  -1  -4   7 5082.00 331.980   2 
   1   4  -7 4538.71 352.659   2 
   1   4  -6 176.070 86.7702   2 
  -1  -4   6 326.842 98.5427   3 
  -1  -4   6 415.133 99.2499   2 
  -1  -4   5 1160.97 158.761   3 
   1   4  -5 922.670 144.352   2 
  -1  -4   5 1041.58 138.011   2 
  -1  -4   4 55013.2 1001.02   3 
  -1  -4   4 54005.6 901.597   2 
   1   4  -4 53930.9 977.715   2 
   1   4  -3 74047.9 993.666   4 
  -1  -4   3 77153.5 1049.43   2 
   1   4  -2 4252.97 228.364   4 
   1   4  -2 4411.78 261.101   1 
  -1  -4   2 4086.47 240.455   2 
   1   4  -1 3077.03 216.065   1 
  -1  -4   1 3397.83 202.367   4 
   1   4  -1 3418.55 197.865   4 
  -1  -4   0 1277.34 129.196   1 
   1   4   0 811.525 100.913   4 
   1   4   0 1164.01 140.187   1 
  -1  -4   0 1046.68 120.989   4 
  -1  -4  -1 2302.79 177.537   1 
  -1  -4  -1 2199.46 177.879   4 
   1   4   1 2177.20 183.759   1 
   1   4   1 2120.92 163.850   4 
   1   4   2 8794.93 368.843   1 
  -1  -4  -2 7784.04 351.168   4 
   1   4   2 8405.31 335.825   4 
  -1  -4  -2 8345.77 350.253   1 
   1   4   3 486.914 102.531   1 
  -1  -4  -3 458.951 96.2857   1 
  -1  -4  -3 587.616 106.242   4 
   1   4   3 548.353 106.647   4 
   1   4   4 1043.53 149.627   4 
   1   4   4 1161.07 149.297   1 
  -1  -4  -4 1114.85 144.273   1 
  -1  -4  -4 1020.72 154.831   4 
  -1  -4  -5 3116.69 263.692   1 
   1   4   5 2977.05 257.028   4 
  -1  -4  -5 2927.00 257.667   4 
  -1  -4  -5 3205.29 274.385   2 
  -1  -4  -6 3749.76 315.172   1 
  -1  -4  -6 4151.94 332.552   2 
  -1  -4  -6 3913.22 317.833   4 
  -1  -4  -7 1298.22 206.768   1 
  -1  -4  -7 1378.71 214.777   2 
  -1  -4  -8 87.3377 87.9518   1 
  -1  -4  -8-23.2693 111.980   2 
  -1  -4  -9 1231.55 244.368   2 
  -1  -4 -10-39.4468 127.661   2 
  -1  -4 -11-20.0796 135.387   2 
  -1  -4 -12 631.149 223.257   2 
   1   5 -15 177.774 103.040   2 
   1   5 -14 58.5746 118.954   2 
   1   5 -13 1898.80 348.373   2 
   1   5 -12 6180.94 566.210   2 
   1   5 -11 460.236 195.625   2 
   1   5 -10-205.398 152.449   2 
   1   5  -9 5543.80 446.338   2 
  -1  -5   8 2130.32 235.683   2 
   1   5  -8 1839.86 251.853   2 
  -1  -5   7 2648.80 242.208   2 
   1   5  -7 2194.57 255.766   2 
  -1  -5   7 2654.59 263.588   3 
   1   5  -6-4.07096 89.9568   2 
  -1  -5   6 1.70420 56.6796   2 
  -1  -5   6-23.0659 68.7027   3 
   1   5  -5 11245.4 492.566   2 
  -1  -5   5 12254.3 515.216   3 
  -1  -5   5 12153.6 459.173   2 
   1   5  -4 60175.2 978.179   4 
  -1  -5   4 59794.1 988.775   2 
   1   5  -3 5267.74 279.767   4 
  -1  -5   3 5039.92 288.417   2 
   1   5  -2 9386.06 427.511   1 
   1   5  -2 9159.47 344.845   4 
  -1  -5   2 9370.95 385.572   2 
   1   5  -1 9962.85 349.521   4 
   1   5  -1 9920.18 430.329   1 
  -1  -5   1 10191.4 373.247   4 
  -1  -5   0 30379.2 672.263   4 
  -1  -5   0 32681.6 727.007   1 
   1   5   0 31440.4 621.434   4 
   1   5   0 31180.1 760.124   1 
  -1  -5  -1 6044.09 317.167   4 
   1   5   1 6384.18 353.349   1 
   1   5   1 6265.61 290.511   4 
  -1  -5  -1 6327.65 332.687   1 
   1   5   2 9277.14 433.493   1 
  -1  -5  -2 9338.52 411.068   1 
  -1  -5  -2 8708.89 397.133   4 
   1   5   2 9778.91 375.378   4 
   1   5   3 719.338 135.877   1 
  -1  -5  -3 697.043 124.139   4 
  -1  -5  -3 858.692 137.928   1 
   1   5   4 797.420 138.054   4 
   1   5   4 702.342 127.745   1 
  -1  -5  -4 1138.00 160.922   4 
  -1  -5  -4 1025.72 159.188   1 
  -1  -5  -5 10829.0 516.662   4 
  -1  -5  -5 10311.6 507.849   1 
   1   5   5 9761.68 469.330   4 
  -1  -5  -5 10470.2 500.429   2 
  -1  -5  -6 942.962 172.305   1 
  -1  -5  -6 1056.21 193.122   2 
  -1  -5  -7 3848.19 352.449   1 
  -1  -5  -7 4302.59 373.469   2 
  -1  -5  -8 2600.08 307.684   1 
  -1  -5  -8 2994.63 333.970   2 
  -1  -5  -9 232.605 155.665   2 
  -1  -5 -10 105.548 130.849   2 
  -1  -5 -11 83.8100 133.422   2 
  -1  -5 -12 137.550 142.685   2 
   1   6 -15-183.507 170.036   2 
   1   6 -14 227.808 164.124   2 
   1   6 -13 230.697 147.905   2 
   1   6 -12 906.597 230.654   2 
   1   6 -11 1612.52 276.876   2 
   1   6 -10 13848.4 754.588   2 
   1   6  -9 6687.96 490.574   2 
  -1  -6   8 3343.09 287.168   2 
   1   6  -8 3322.56 331.199   2 
  -1  -6   7 22846.1 698.252   2 
  -1  -6   7 21340.4 757.139   3 
   1   6  -7 21761.8 791.008   2 
  -1  -6   6 20753.8 636.562   2 
  -1  -6   6 21366.3 733.404   3 
   1   6  -6 20880.2 727.258   2 
   1   6  -5 25495.8 843.678   1 
   1   6  -5 25312.7 695.955   4 
  -1  -6   5 25220.0 781.362   3 
  -1  -6   5 25200.2 681.717   2 
   1   6  -4 2476.02 210.396   4 
   1   6  -4 2597.03 266.642   1 
  -1  -6   4 2407.40 212.182   2 
   1   6  -3 737.779 115.331   4 
  -1  -6   3 849.137 125.286   2 
   1   6  -2 9044.99 353.730   4 
  -1  -6   2 9121.91 398.032   2 
  -1  -6   1 2026.43 179.949   4 
   1   6  -1 2302.96 174.478   4 
  -1  -6   0 1706.22 184.093   1 
   1   6   0 1745.68 156.527   4 
  -1  -6   0 1885.43 180.826   4 
   1   6   1 4270.77 250.410   4 
  -1  -6  -1 4592.16 293.977   4 
  -1  -6  -1 4440.08 304.754   1 
   1   6   2 2049.75 184.858   4 
  -1  -6  -2 2697.16 246.348   1 
  -1  -6  -2 2463.19 227.064   4 
  -1  -6  -3 462.055 119.194   1 
   1   6   3 247.545 92.2785   4 
  -1  -6  -3 253.948 97.8297   4 
   1   6   4 1793.00 205.647   4 
  -1  -6  -4 1676.49 210.672   1 
  -1  -6  -4 1677.58 213.091   4 
  -1  -6  -5 912.081 166.433   4 
  -1  -6  -5 940.619 169.917   2 
  -1  -6  -5 1172.63 190.313   1 
  -1  -6  -6 114.410 97.8439   1 
  -1  -6  -6 152.319 120.507   2 
  -1  -6  -7 2012.84 272.414   1 
  -1  -6  -7 1900.68 265.015   2 
  -1  -6  -8-37.7256 140.221   2 
  -1  -6  -9-15.5990 120.428   2 
  -1  -6 -10 358.108 152.893   2 
  -1  -6 -11 463.930 180.956   2 
   1   7 -15-52.0985 137.487   2 
   1   7 -14 488.755 224.683   2 
   1   7 -13 111.072 151.844   2 
   1   7 -12-67.7121 117.106   2 
   1   7 -11 19.7141 102.950   2 
   1   7 -10 2272.12 321.302   2 
   1   7  -9 188.813 123.733   2 
   1   7  -8 1180.97 208.352   2 
  -1  -7   8 1081.58 171.745   2 
   1   7  -7 1828.01 285.451   1 
  -1  -7   7 2096.01 247.773   3 
   1   7  -7 1327.60 216.401   2 
  -1  -7   7 2040.13 215.871   2 
   1   7  -6 524.383 130.476   4 
  -1  -7   6 685.387 131.963   2 
   1   7  -6 434.745 167.333   1 
  -1  -7   6 341.619 110.620   3 
   1   7  -5 439.890 108.903   4 
  -1  -7   5 540.135 116.168   2 
   1   7  -4 1718.90 175.412   4 
   1   7  -4 1457.10 235.322   1 
  -1  -7   4 1644.33 183.442   2 
   1   7  -3 2628.58 285.206   1 
   1   7  -3 2286.50 194.396   4 
  -1  -7   3 2553.90 218.832   2 
   1   7  -2 531.535 82.6557   4 
   1   7  -2 534.630 142.924   1 
  -1  -7   2 515.761 107.539   2 
   1   7  -1 15602.5 468.015   4 
  -1  -7   1 14615.8 499.480   4 
  -1  -7   0 3163.40 274.109   1 
  -1  -7   0 3093.33 244.042   4 
   1   7   0 2775.26 203.447   4 
  -1  -7  -1-48.8848 59.2030   1 
   1   7   1 7.18580 45.2312   4 
  -1  -7  -1 13.6903 55.0617   4 
   1   7   2 2084.83 196.748   4 
  -1  -7  -2 2503.27 255.594   1 
  -1  -7  -2 2001.10 229.416   4 
  -1  -7  -3 5567.34 384.794   1 
   1   7   3 6739.60 380.007   4 
  -1  -7  -3 5909.33 388.904   4 
   1   7   3 6553.85 441.419   1 
   1   7   4 17726.0 641.886   4 
  -1  -7  -4 17417.5 705.136   1 
  -1  -7  -4 17454.8 692.529   4 
   1   7   4 18235.4 739.654   1 
  -1  -7  -5 6691.78 434.019   2 
  -1  -7  -5 6296.24 443.713   1 
   1   7   5 6491.74 452.192   1 
   1   7   6 348.482 127.615   1 
  -1  -7  -6 454.207 146.624   2 
  -1  -7  -6 451.004 134.651   1 
  -1  -7  -7-81.1869 116.562   2 
  -1  -7  -8-36.5561 109.734   2 
  -1  -7  -9 143.039 152.303   2 
  -1  -7 -10-483.848 191.035   2 
  -1  -7 -11 1209.52 279.802   2 
   1   8 -14 366.457 183.803   2 
   1   8 -13-415.174 184.806   2 
   1   8 -12-113.954 119.051   2 
   1   8 -11 178.519 120.180   2 
   1   8 -10 796.272 206.066   2 
   1   8 -10 801.722 228.106   1 
   1   8  -9 3131.35 414.570   1 
   1   8  -9 2583.41 322.211   2 
   1   8  -8 774.752 214.872   1 
   1   8  -8 428.925 128.279   4 
  -1  -8   8 931.741 155.637   2 
   1   8  -7 87.8901 68.5010   4 
  -1  -8   7 188.207 71.5424   2 
   1   8  -7 85.2569 141.944   1 
  -1  -8   6 21.0920 83.9630   3 
  -1  -8   6-47.9692 56.4030   2 
   1   8  -6 12.2542 131.990   1 
   1   8  -6 127.318 84.0252   4 
   1   8  -5 23284.9 935.244   1 
   1   8  -5 22884.3 665.462   4 
  -1  -8   5 22047.0 659.530   2 
   1   8  -4 3590.92 252.409   4 
   1   8  -4 3974.40 391.487   1 
  -1  -8   4 3798.70 279.237   2 
  -1  -8   3-20.0969 76.7805   2 
   1   8  -3-41.2787 143.711   1 
   1   8  -3-5.09518 61.1791   4 
   1   8  -2-55.7318 97.7887   1 
  -1  -8   2 67.7262 61.5255   2 
   1   8  -2 45.1615 51.7853   4 
   1   8  -1 2003.92 272.440   1 
  -1  -8   1 2420.35 215.790   4 
   1   8  -1 2367.57 193.925   4 
  -1  -8   0 507.104 124.368   1 
  -1  -8   0 511.903 108.510   4 
   1   8   0 627.750 104.198   4 
   1   8   0 437.798 155.302   1 
   1   8   1-88.6813 111.804   1 
   1   8   1 18.8958 51.0601   4 
  -1  -8  -1-40.5303 79.2670   4 
  -1  -8  -1 41.7024 66.2168   1 
   1   8   2 11.2373 67.3822   4 
   1   8   2 25.3509 106.396   1 
  -1  -8  -2-54.4614 72.1564   4 
  -1  -8  -2 98.9326 66.6845   1 
   1   8   3 4065.11 307.993   4 
  -1  -8  -3 3931.86 351.441   1 
  -1  -8  -3 3613.28 317.703   4 
   1   8   3 3689.58 363.842   1 
  -1  -8  -4-22.3698 80.4660   1 
   1   8   4-23.8925 127.035   1 
  -1  -8  -5 1855.25 247.873   2 
   1   8   5 1631.27 253.142   1 
  -1  -8  -6 1859.21 265.844   2 
   1   8   6 2084.64 285.113   1 
  -1  -8  -7 845.613 198.520   2 
  -1  -8  -8-32.3842 111.127   2 
  -1  -8  -9 381.126 186.201   2 
  -1  -8 -10 244.895 164.446   2 
   1   9 -13-96.0246 98.4113   2 
   1   9 -12 476.849 228.472   1 
   1   9 -12 228.360 140.771   2 
   1   9 -11 142.724 89.9697   2 
   1   9 -11 152.517 164.866   1 
   1   9 -10 1039.03 269.264   1 
   1   9 -10 477.147 139.234   4 
   1   9 -10 668.187 189.019   2 
   1   9  -9 475.955 214.287   1 
   1   9  -9 624.160 148.898   4 
   1   9  -8 74.8009 142.219   1 
   1   9  -8 89.2457 84.8430   4 
   1   9  -7 430.667 112.168   4 
   1   9  -7 433.774 178.819   1 
  -1  -9   7 496.925 110.941   2 
   1   9  -6 3525.35 280.507   4 
   1   9  -6 4093.23 445.358   1 
  -1  -9   6 3745.51 283.191   2 
  -1  -9   5 7887.56 403.551   2 
   1   9  -5 8512.01 610.645   1 
   1   9  -5 8184.74 391.542   4 
  -1  -9   4 359.559 99.5363   2 
   1   9  -4 101.415 142.880   1 
   1   9  -4 224.577 68.5749   4 
   1   9  -3 112.165 58.9130   4 
  -1  -9   3 15.0817 58.3597   2 
   1   9  -2 7396.01 328.547   4 
   1   9  -2 8059.49 565.164   1 
  -1  -9   2 7428.68 411.347   2 
   1   9  -1 7792.02 557.073   1 
   1   9  -1 8482.29 358.157   4 
  -1  -9   1 7769.41 390.162   4 
   1   9   0 153.122 64.2450   4 
  -1  -9   0 179.677 70.2196   4 
   1   9   0 161.383 121.000   1 
   1   9   1 342.900 100.804   4 
   1   9   1 340.017 135.702   1 
  -1  -9  -1 389.786 100.188   4 
   1   9   2 5518.61 471.118   1 
   1   9   2 5324.97 343.233   4 
  -1  -9  -2 5019.31 377.220   4 
  -1  -9  -3 2268.68 271.204   4 
   1   9   3 2104.50 301.581   1 
   1   9   4 171.696 133.396   1 
  -1  -9  -4 395.024 135.446   2 
  -1  -9  -5 182.603 121.478   2 
   1   9   5 352.519 150.157   1 
   1   9   6 232.478 126.832   1 
  -1  -9  -6 59.2178 97.3463   2 
  -1  -9  -7 395.494 149.157   2 
  -1  -9  -8 156.590 136.555   2 
  -1  -9  -9 234.256 161.447   2 
  -1  -9 -10-187.148 152.171   2 
   1  10 -11 134.052 142.352   1 
   1  10 -10 1038.34 302.792   1 
   1  10  -9 209.996 147.114   1 
   1  10  -8 1767.78 341.363   1 
   1  10  -7 2395.94 385.814   1 
   1  10  -7 2093.16 219.780   4 
   1  10  -6-14.5253 51.1906   4 
   1  10  -6 29.1296 137.153   1 
   1  10  -5 906.800 128.973   4 
   1  10  -5 675.349 205.545   1 
  -1 -10   4 106.130 61.9357   2 
   1  10  -4-27.4521 54.1037   4 
   1  10  -3 485.602 94.2179   4 
   1  10  -3 363.211 150.419   1 
  -1 -10   3 344.562 86.6877   2 
   1  10  -2 905.519 118.692   4 
  -1 -10   2 612.996 135.251   2 
   1  10  -2 913.784 222.475   1 
   1  10  -1 30.2711 55.2371   4 
  -1 -10   1 11.9297 66.6048   2 
   1  10  -1-158.976 151.584   1 
   1  10   0 1387.28 165.110   4 
  -1 -10   0 982.423 155.646   4 
   1  10   0 1246.60 251.032   1 
   1  10   1 1560.95 189.225   4 
   1  10   1 1659.30 299.090   1 
  -1 -10  -1 1925.48 230.984   4 
   1  10   2 3614.16 415.887   1 
   1  10   3 2136.14 322.427   1 
  -1 -10  -3 2315.37 261.539   2 
   1  10   4 778.291 215.734   1 
  -1 -10  -4 1160.40 215.633   2 
  -1 -10  -5 586.477 170.984   2 
   1  10   5 590.372 203.582   1 
  -1 -10  -6 1423.17 252.015   2 
   1  10   6 1456.20 274.451   1 
  -1 -10  -7 978.025 216.747   2 
  -1 -10  -8 95.6599 162.412   2 
  -1 -10  -9-14.3093 121.409   2 
   1  11 -10 514.466 235.171   1 
   1  11  -9 214.196 209.818   1 
   1  11  -8-142.005 165.371   1 
   1  11  -7 1483.01 315.304   1 
   1  11  -6 2875.27 423.990   1 
   1  11  -5-100.057 158.044   1 
   1  11  -4-31.2088 134.652   1 
   1  11  -3 44.7704 126.637   1 
   1  11  -2 106.487 106.431   1 
   1  11  -1 273.816 159.773   1 
   1  11   0 202.081 154.038   1 
   1  11   0 399.351 95.6685   4 
   1  11   1 1907.03 315.413   1 
   1  11   2 75.1304 108.676   1 
   1  11   3 162.513 116.492   1 
  -1 -11  -3 202.091 101.629   2 
  -1 -11  -4 119.688 89.6080   2 
   1  11   4 153.114 116.894   1 
  -1 -11  -5 121.147 104.480   2 
   1  11   5 327.210 171.299   1 
   1  11   6-131.565 135.815   1 
  -1 -11  -6 30.8867 102.966   2 
  -1 -11  -7 367.873 160.309   2 
   1  12  -8 133.833 196.635   1 
   1  12  -7 205.035 156.708   1 
   1  12  -6 472.971 200.569   1 
   1  12  -5 95.3292 150.687   1 
   1  12  -4 32.1423 155.339   1 
   1  12  -3 185.204 157.470   1 
   1  12  -2 1202.69 275.784   1 
   1  12  -1 1896.44 341.819   1 
   1  12   0 725.853 245.608   1 
   1  12   1 88.4127 128.895   1 
   1  12   2 43.1560 124.810   1 
   1  12   3 387.203 182.828   1 
   1  12   4 131.526 136.736   1 
   1  13  -6 550.622 207.199   1 
   1  13  -5 1118.98 305.467   1 
   1  13  -4-794.685 262.492   1 
   1  13  -3-92.5455 167.172   1 
   1  13  -2 61.8793 129.050   1 
   1  13  -1 212.790 184.109   1 
   1  13   0 74.5417 138.424   1 
   1  13   1 46.9179 136.773   1 
   1  13   2 500.072 201.474   1 
   1  13   3 51.7813 128.777   1 
   1  14  -3-430.168 216.505   1 
   1  14  -2-96.4624 143.628   1 
   1  14  -1 221.534 173.957   1 
   1  14   0-172.749 163.490   1 
  -2  13   4 91.2648 168.938   1 
  -2  13   3 88.9709 137.683   1 
  -2  13   2 310.710 189.820   1 
  -2  13   1 542.131 235.938   1 
  -2  13   0 52.3570 147.102   1 
  -2  13  -1-118.310 163.038   1 
  -2  13  -2 133.878 180.201   1 
  -2  13  -3 186.131 190.734   1 
  -2  13  -4 58.9025 158.215   1 
  -2  13  -5 151.233 169.060   1 
  -2  12   6 35.9783 160.244   1 
  -2  12   5 278.551 195.565   1 
  -2  12   4 452.286 218.827   1 
  -2  12   3 2389.24 404.100   1 
  -2  12   2 5251.40 603.935   1 
  -2  12   1 2121.08 392.080   1 
  -2  12   0 120.685 147.455   1 
  -2  12  -1-0.81512 182.083   1 
  -2  12  -2 2020.31 382.232   1 
  -2  12  -3 1089.25 296.962   1 
  -2  12  -4 84.2623 156.074   1 
  -2  12  -5 218.959 170.903   1 
  -2  12  -6 155.548 158.887   1 
  -2  12  -7-84.3587 184.278   1 
  -2  12  -8 308.253 157.913   1 
  -2  11   8 402.524 248.503   1 
  -2  11   7-13.7115 115.312   1 
  -2  11   6-78.2971 133.925   1 
  -2  11   5 1157.89 311.978   1 
  -2  11   4 1351.28 301.135   1 
  -2  11   3 107.673 147.906   1 
  -2  11   2 297.671 175.290   1 
  -2  11   1 183.359 127.743   1 
  -2  11   0-80.1030 116.813   1 
  -2  11  -1 219.032 186.698   1 
  -2  11  -2 719.791 233.701   1 
  -2  11  -3 257.236 208.193   1 
  -2  11  -4 1269.08 325.794   1 
  -2  11  -5 740.200 225.536   1 
  -2  11  -6 45.1657 124.624   1 
  -2  11  -7 1246.62 305.665   1 
  -2  11  -8 1051.13 278.611   1 
  -2  11  -9 632.384 221.400   1 
   2 -10  -9-66.2752 108.635   2 
   2 -10  -8 254.537 111.615   2 
  -2  10   8 310.435 170.625   1 
   2 -10  -7-107.053 100.399   2 
  -2  10   7-90.5335 153.006   1 
   2 -10  -6 278.770 112.400   2 
  -2  10   6 240.733 168.481   1 
   2 -10  -5 353.930 103.112   2 
  -2  10   5 417.957 176.985   1 
  -2  10   4 270.029 176.276   1 
   2 -10  -3 2689.42 208.812   2 
  -2  10   3 2800.68 405.455   1 
   2 -10  -2 79.0127 40.8742   2 
  -2  10   2 1.34549 144.283   1 
  -2  10   1-28.9941 149.119   1 
   2 -10  -1 16.0919 15.8388   4 
  -2  10   0 4258.63 478.295   1 
  -2  10  -1 229.085 134.898   1 
  -2  10  -2 3180.61 411.504   1 
  -2  10  -3 10280.4 732.397   1 
   2 -10   4 12738.1 411.465   3 
  -2  10  -4 14047.4 861.101   1 
  -2  10  -5 21859.3 1070.31   1 
  -2  10  -6 1885.10 336.379   1 
  -2  10  -7 1980.79 341.618   1 
  -2  10  -8 784.622 254.901   1 
  -2  10  -9 9.75507 119.772   1 
  -2  10 -10 572.895 193.570   1 
  -2  10 -11-88.3331 123.493   1 
   2  -9 -11-145.016 139.792   2 
   2  -9 -10-533.363 187.891   2 
   2  -9  -9-82.4209 116.922   2 
  -2   9   8 1255.87 290.969   1 
   2  -9  -8 1338.97 248.651   2 
   2  -9  -7 1023.59 192.713   2 
  -2   9   7 1184.39 269.379   1 
  -2   9   6 368.258 184.172   1 
   2  -9  -6 126.521 92.0610   2 
   2  -9  -5 38.0759 61.4974   4 
  -2   9   5-102.599 131.842   1 
   2  -9  -5-26.1726 89.1238   2 
   2  -9  -4 5236.12 318.134   4 
  -2   9   4 5400.50 515.038   1 
  -2   9   3 376.298 170.060   1 
   2  -9  -3 375.541 84.1184   2 
   2  -9  -3 469.367 93.9979   4 
  -2   9   2 2931.34 390.278   1 
   2  -9  -2 3110.97 194.374   4 
   2  -9  -2 3168.07 186.610   2 
  -2   9   1 788.002 226.016   1 
   2  -9  -1 791.314 76.3159   4 
   2  -9  -1 791.796 68.7856   2 
  -2   9   0 4169.62 433.425   1 
  -2   9  -1 462.862 157.571   1 
  -2   9  -2-5.14609 122.483   1 
  -2   9  -3 1237.49 260.551   1 
  -2   9  -4 19289.4 937.387   1 
   2  -9   4 19291.0 454.792   3 
  -2   9  -5 19526.2 950.308   1 
  -2   9  -6 285.948 177.224   1 
  -2   9  -7 398.436 90.7371   2 
  -2   9  -7 425.035 176.230   1 
  -2   9  -8 281.991 170.458   1 
  -2   9  -8 57.1517 65.7138   2 
  -2   9  -9 1684.74 221.248   2 
  -2   9  -9 1982.25 358.204   1 
  -2   9 -10 1472.54 314.255   1 
  -2   9 -10 811.523 169.448   2 
  -2   9 -11-120.370 149.803   1 
  -2   9 -12 156.416 144.433   1 
   2  -8 -12-185.003 151.913   2 
   2  -8 -11 148.813 146.452   2 
   2  -8 -10 1588.64 282.294   2 
   2  -8  -9 1462.64 254.761   2 
   2  -8  -8 580.631 160.491   2 
   2  -8  -7 943.695 179.819   2 
  -2   8   7 966.717 248.706   1 
   2  -8  -6 340.727 122.016   2 
  -2   8   6-87.6032 142.022   1 
   2  -8  -5 381.477 116.723   2 
  -2   8   5 114.328 139.530   1 
   2  -8  -5 142.790 90.3257   4 
   2  -8  -4 9307.04 401.493   4 
  -2   8   4 10579.7 682.363   1 
  -2   8   3 1137.87 239.268   1 
   2  -8  -3 1424.85 146.953   4 
   2  -8  -3 1333.81 145.481   2 
  -2   8   2 508.268 159.549   1 
   2  -8  -2 720.528 93.0919   4 
   2  -8  -2 814.583 97.6042   2 
  -2   8   1 10964.1 665.558   1 
   2  -8  -1 10111.1 270.291   4 
   2  -8  -1 10507.6 256.139   2 
  -2   8   0 2871.86 348.285   1 
  -2   8  -1 2774.41 337.929   1 
  -2   8  -2 12232.5 693.913   1 
  -2   8  -3 33438.7 1141.49   1 
   2  -8   3 33747.7 571.402   3 
  -2   8  -4 42779.4 1291.25   1 
  -2   8  -5 19928.9 908.359   1 
  -2   8  -6 2173.36 140.035   4 
  -2   8  -6 2235.04 332.084   1 
  -2   8  -6 2246.93 179.716   2 
  -2   8  -7 3424.57 408.450   1 
  -2   8  -7 3026.67 199.741   4 
  -2   8  -7 2874.18 232.622   2 
  -2   8  -8 4580.62 470.520   1 
  -2   8  -8 3899.80 256.228   4 
  -2   8  -8 3715.36 299.845   2 
  -2   8  -9-15.7079 119.806   1 
  -2   8  -9 379.635 126.802   2 
  -2   8 -10 738.752 221.462   1 
  -2   8 -10 1155.35 206.534   2 
  -2   8 -11 261.921 123.757   2 
  -2   8 -11 288.286 157.278   1 
  -2   8 -12 227.285 123.387   2 
  -2   8 -12 167.001 153.390   1 
  -2   8 -13-95.0243 131.775   1 
  -2   8 -13-90.7103 92.0082   2 
   2  -7 -12 28.9387 129.175   2 
   2  -7 -11-11.9719 136.330   2 
   2  -7 -10 258.687 163.236   2 
   2  -7  -9 1177.53 236.566   2 
   2  -7  -8 6045.77 460.188   2 
  -2   7   7 843.379 225.965   1 
   2  -7  -7 469.723 136.588   2 
   2  -7  -6 6743.44 415.340   2 
   2  -7  -6 6557.54 389.434   4 
  -2   7   6 6241.46 518.607   1 
   2  -7  -5 12109.4 485.760   4 
  -2   7   5 11929.4 695.049   1 
   2  -7  -4 1367.14 167.804   2 
  -2   7   4 1054.06 215.641   1 
   2  -7  -3 4458.35 243.290   4 
  -2   7   3 4192.76 399.199   1 
   2  -7  -3 4260.03 247.354   2 
   2  -7  -2 473.774 74.5262   4 
   2  -7  -2 515.351 80.9167   2 
  -2   7   2 350.049 142.907   1 
   2  -7  -2 475.300 149.639   1 
   2  -7  -1 8637.47 238.918   4 
   2  -7  -1 8743.77 523.500   1 
   2  -7  -1 8482.88 234.806   2 
   2  -7   0 35617.1 1033.06   1 
   2  -7   1 6521.66 440.027   1 
   2  -7   2 827.931 164.282   1 
  -2   7  -3 3898.20 371.048   1 
   2  -7   3 4277.40 349.828   1 
   2  -7   3 3925.12 163.716   3 
  -2   7  -4 29.7271 94.6047   1 
  -2   7  -4 17.8764 23.5902   2 
  -2   7  -5 9953.82 280.491   4 
  -2   7  -5 9640.26 326.803   2 
  -2   7  -5 9344.68 585.019   1 
  -2   7  -6 3528.27 202.602   4 
  -2   7  -6 3799.55 393.425   1 
  -2   7  -6 3321.28 224.847   2 
  -2   7  -7 9694.83 376.577   4 
  -2   7  -7 9680.24 618.913   1 
  -2   7  -7 9521.06 424.738   2 
  -2   7  -8 3189.70 241.800   4 
  -2   7  -8 3784.02 411.628   1 
  -2   7  -8 3801.84 297.224   2 
  -2   7  -9-17.5300 144.749   1 
  -2   7  -9 150.168 82.9832   4 
  -2   7  -9 107.401 82.7967   2 
  -2   7 -10 867.354 168.594   2 
  -2   7 -10 1083.31 246.703   1 
  -2   7 -11 128.029 110.935   2 
  -2   7 -11-23.5370 114.012   1 
  -2   7 -12 712.954 187.704   2 
  -2   7 -12 535.928 195.387   1 
  -2   7 -13 276.887 142.327   2 
  -2   7 -13 727.612 225.774   1 
  -2   7 -14 345.762 143.342   2 
   2  -6 -13-368.780 183.622   2 
   2  -6 -12 124.072 130.297   2 
   2  -6 -11 566.653 200.428   2 
   2  -6 -10 2486.65 339.178   2 
   2  -6  -9 8574.26 569.641   2 
   2  -6  -8 3584.10 351.335   2 
   2  -6  -7 3917.69 347.112   2 
  -2   6   7 3580.27 384.137   1 
   2  -6  -6 51379.6 1064.17   4 
   2  -6  -6 49398.3 1093.62   2 
  -2   6   6 52985.0 1379.43   1 
   2  -6  -5 61797.9 1081.09   4 
  -2   6   5 64207.8 1497.91   1 
   2  -6  -4 9685.46 407.801   2 
   2  -6  -4 10386.7 405.299   4 
   2  -6  -4 9947.90 582.647   1 
  -2   6   4 10029.6 585.431   1 
   2  -6  -3 7938.17 317.623   4 
   2  -6  -3 7792.81 326.373   2 
   2  -6  -3 8293.62 513.320   1 
   2  -6  -2 51390.0 717.978   2 
   2  -6  -2 52519.3 1247.54   1 
   2  -6  -2 49710.7 696.849   4 
   2  -6  -1 87832.8 737.566   4 
   2  -6  -1 87217.3 760.821   2 
   2  -6   0 29677.4 288.085   4 
   2  -6   0 30794.9 339.285   4 
   2  -6   1 15856.5 640.954   1 
   2  -6   2 3187.93 284.593   1 
   2  -6   3 131.027 64.7719   1 
  -2   6  -3 92.2613 21.4337   2 
  -2   6  -4 9379.44 530.163   1 
  -2   6  -4 9463.30 258.301   4 
  -2   6  -4 9601.43 276.085   2 
  -2   6  -5 3648.49 339.340   1 
  -2   6  -5 3614.19 194.356   4 
  -2   6  -5 3544.36 205.115   2 
  -2   6  -6 404.288 129.968   1 
  -2   6  -6 460.447 91.2598   2 
  -2   6  -6 621.261 95.9252   4 
  -2   6  -7 3139.03 340.782   1 
  -2   6  -7 3332.30 235.820   4 
  -2   6  -7 3250.75 248.605   2 
  -2   6  -8 7526.52 381.491   4 
  -2   6  -8 7189.37 517.624   1 
  -2   6  -8 7446.37 417.668   2 
  -2   6  -9 8093.71 469.552   3 
  -2   6  -9 8276.59 577.536   1 
  -2   6  -9 8087.41 431.793   4 
  -2   6  -9 7803.29 453.932   2 
  -2   6 -10 326.978 128.875   2 
  -2   6 -10 358.336 125.546   3 
  -2   6 -10 290.044 129.829   1 
  -2   6 -11 483.842 156.741   3 
  -2   6 -11 353.493 124.034   2 
  -2   6 -11 709.554 211.647   1 
  -2   6 -12 366.224 171.613   1 
  -2   6 -12 513.138 187.511   2 
  -2   6 -12 418.929 154.944   3 
  -2   6 -13 1487.49 306.785   1 
  -2   6 -13 975.676 223.014   2 
  -2   6 -13 1080.85 232.848   3 
  -2   6 -14-2.04864 82.1916   2 
  -2   6 -14 250.882 135.254   1 
   2  -5 -13-140.162 134.717   2 
   2  -5 -12-105.892 141.218   2 
   2  -5 -11 148.625 138.388   2 
   2  -5 -10 518.839 170.430   2 
   2  -5  -9 5878.50 465.700   2 
   2  -5  -8-47.1389 96.8171   2 
   2  -5  -7 158.973 109.087   2 
   2  -5  -6 9408.78 474.650   2 
  -2   5   6 10122.0 581.945   1 
   2  -5  -6 10410.8 477.578   4 
   2  -5  -5 1108.11 202.954   1 
  -2   5   5 1116.24 147.726   2 
  -2   5   5 1238.20 224.969   1 
  -2   5   4 3287.74 223.208   2 
   2  -5  -4 3801.34 339.860   1 
   2  -5  -4 3602.63 244.272   2 
  -2   5   3 1497.87 134.943   2 
   2  -5  -3 1397.45 198.892   1 
   2  -5  -3 1685.29 150.876   2 
   2  -5  -2 12839.2 581.166   1 
  -2   5   2 12341.7 320.661   2 
   2  -5  -2 12999.7 360.409   2 
   2  -5  -1 80532.2 1392.92   1 
   2  -5  -1 77952.5 731.180   2 
   2  -5   0 4376.09 316.224   1 
   2  -5   0 4796.96 155.823   4 
   2  -5   1 737.696 137.167   1 
   2  -5   2 101.179 61.4876   1 
  -2   5  -3 2707.81 133.884   4 
  -2   5  -3 2884.09 129.032   2 
  -2   5  -4 26897.6 494.228   2 
  -2   5  -4 26117.2 492.932   4 
  -2   5  -5-5.91433 38.8885   4 
  -2   5  -5 27.3427 61.5020   1 
  -2   5  -5 6.44659 47.6142   2 
  -2   5  -6 67.7308 103.184   1 
  -2   5  -6 103.075 66.6842   2 
  -2   5  -7 4174.57 293.331   2 
  -2   5  -7 4323.40 277.444   4 
  -2   5  -7 4577.67 380.747   1 
  -2   5  -7 4207.57 281.348   3 
  -2   5  -8 4569.77 328.226   2 
  -2   5  -8 4563.78 393.693   1 
  -2   5  -8 4528.46 311.540   4 
  -2   5  -8 4666.78 326.193   3 
  -2   5  -9 2724.10 278.529   2 
  -2   5  -9 2515.87 263.059   3 
  -2   5  -9 2625.92 257.872   4 
  -2   5 -10 137.650 111.833   2 
  -2   5 -10 109.378 98.3057   3 
  -2   5 -11 625.464 160.769   2 
  -2   5 -11 524.216 161.794   3 
  -2   5 -12 435.334 161.714   2 
  -2   5 -12 374.180 146.476   3 
  -2   5 -13 355.442 163.170   2 
  -2   5 -13-138.527 113.734   3 
  -2   5 -14-158.897 124.708   2 
  -2   5 -14 67.4826 105.751   3 
  -2   5 -15 1264.01 283.020   3 
   2  -4 -13-246.163 175.394   2 
   2  -4 -12-25.4456 116.503   2 
   2  -4 -11 35.9662 99.7999   2 
   2  -4 -10 2562.42 335.519   2 
   2  -4  -9 795.816 187.386   2 
   2  -4  -8 5441.44 411.853   2 
   2  -4  -7 13784.3 605.029   2 
  -2   4   7 13731.5 573.747   2 
   2  -4  -6 84.4967 88.6394   1 
  -2   4   6 9.56654 63.5589   2 
   2  -4  -6 14.0140 70.2380   2 
   2  -4  -5 6787.49 448.968   1 
  -2   4   5 6835.90 344.471   2 
   2  -4  -4 262.225 89.3714   1 
   2  -4  -4 478.055 100.846   2 
  -2   4   4 484.066 91.0616   2 
   2  -4  -3 3585.40 302.208   1 
  -2   4   3 3779.53 209.306   2 
   2  -4  -3 3690.79 220.107   2 
  -2   4   2 26917.1 480.088   2 
   2  -4  -2 26343.4 766.969   1 
   2  -4  -2 27461.8 525.892   2 
   2  -4  -1 61419.8 1125.28   1 
   2  -4  -1 63055.8 673.785   2 
  -2   4   1 62274.7 594.249   2 
  -2   4   0 31984.6 320.105   2 
   2  -4   0 32344.0 444.806   4 
   2  -4   1 11761.6 461.360   1 
   2  -4   1 12003.7 229.132   4 
  -2   4  -2 1780.58 109.047   4 
  -2   4  -2 1823.07 192.472   1 
   2  -4   2 1719.03 175.177   1 
   2  -4   2 2038.42 98.5694   4 
  -2   4  -2 1752.46 89.7964   2 
  -2   4  -3 18101.6 363.384   2 
  -2   4  -3 17977.5 391.402   4 
   2  -4   3 18382.0 358.467   4 
  -2   4  -4 156.945 43.7740   3 
  -2   4  -4 101.193 42.3378   4 
  -2   4  -4 155.849 82.7323   1 
  -2   4  -4 156.639 58.8377   2 
  -2   4  -5 3843.56 233.168   2 
  -2   4  -5 3775.18 226.384   4 
  -2   4  -5 3340.66 277.402   1 
  -2   4  -5 3910.25 208.805   3 
  -2   4  -6 34863.7 769.201   2 
  -2   4  -6 33907.3 728.555   4 
  -2   4  -6 33756.1 706.950   3 
  -2   4  -6 33064.3 890.150   1 
  -2   4  -7 2100.90 216.268   2 
  -2   4  -7 1840.18 190.621   3 
  -2   4  -7 2380.67 213.432   4 
  -2   4  -8 36.1831 65.0254   4 
  -2   4  -8 2.87058 72.3832   2 
  -2   4  -8 47.8449 62.3796   3 
  -2   4  -9 734.779 159.242   3 
  -2   4  -9 616.308 140.878   2 
  -2   4 -10 173.015 109.422   2 
  -2   4 -10 259.219 110.001   3 
  -2   4 -11 86.1912 104.193   2 
  -2   4 -11 171.367 123.025   3 
  -2   4 -12-8.97644 84.6590   3 
  -2   4 -12 65.7695 116.648   2 
  -2   4 -13 253.926 149.462   2 
  -2   4 -13-266.802 145.217   3 
  -2   4 -14 1162.21 268.990   2 
  -2   4 -14 1393.35 289.442   3 
  -2   4 -15-172.349 133.035   3 
   2  -3 -14 129.180 182.532   2 
   2  -3 -13 319.605 182.255   2 
   2  -3 -12 51.2621 144.111   2 
   2  -3 -11 614.885 181.837   2 
   2  -3 -10 2630.54 333.361   2 
   2  -3  -9-21.1159 112.943   2 
   2  -3  -8 4272.01 364.603   2 
   2  -3  -7 425.610 118.976   2 
   2  -3  -7 520.505 137.094   1 
  -2   3   7 762.047 137.219   2 
  -2   3   6 545.780 109.929   2 
   2  -3  -6 328.351 99.1257   1 
  -2   3   5 16287.3 534.967   2 
   2  -3  -5 16699.8 663.772   1 
  -2   3   4 1161.50 133.937   2 
   2  -3  -4 1276.05 175.367   1 
   2  -3  -4 1058.29 139.108   2 
   2  -3  -3 45823.5 984.759   1 
  -2   3   3 47673.9 733.749   2 
   2  -3  -3 48218.1 784.847   2 
  -2   3   2 1808.68 124.949   2 
   2  -3  -2 2040.67 198.855   1 
   2  -3  -2 1941.65 145.813   2 
   2  -3  -1 16280.7 366.848   2 
   2  -3  -1 17398.3 543.443   1 
  -2   3   1 17226.4 334.073   2 
   2  -3   0 8569.51 361.804   1 
   2  -3   0 8493.08 251.999   4 
   2  -3   0 9068.11 196.196   3 
  -2   3   0 8789.10 224.195   2 
   2  -3   1 29319.6 645.546   1 
   2  -3   1 30400.1 440.040   4 
  -2   3  -1 29224.7 464.560   4 
  -2   3  -1 30138.0 675.187   1 
   2  -3   2 71856.6 697.409   4 
  -2   3  -2 71906.8 1029.42   1 
  -2   3  -2 70817.9 780.038   4 
   2  -3   2 71890.6 981.139   1 
   2  -3   3 19637.1 402.940   4 
  -2   3  -3 19705.1 558.421   1 
  -2   3  -3 20464.7 455.411   4 
   2  -3   4 25765.0 532.274   4 
  -2   3  -4 25034.3 648.497   1 
  -2   3  -4 26567.8 551.169   2 
  -2   3  -4 25860.3 562.074   4 
  -2   3  -5 11546.4 412.346   2 
  -2   3  -5 11693.7 415.016   4 
  -2   3  -6 21571.5 622.591   2 
  -2   3  -6 21279.3 607.422   4 
  -2   3  -7 335.758 105.727   2 
  -2   3  -7 504.610 114.514   4 
  -2   3  -8 3353.87 306.033   2 
  -2   3  -8 2289.17 248.239   4 
  -2   3  -9 1627.40 233.627   2 
  -2   3 -10 2654.34 312.089   2 
  -2   3 -11 560.707 183.800   2 
  -2   3 -12 152.496 92.9105   2 
  -2   3 -13-256.807 150.462   2 
  -2   3 -13 332.708 143.462   3 
  -2   3 -14 596.357 203.157   3 
  -2   3 -14 572.779 236.577   2 
  -2   3 -15 115.433 128.049   3 
   2  -2 -14-429.619 211.523   3 
   2  -2 -14 213.366 194.848   2 
   2  -2 -13 1640.32 328.394   2 
   2  -2 -13 2260.28 394.511   3 
   2  -2 -12 3716.95 441.631   2 
   2  -2 -11 2431.15 345.303   2 
   2  -2 -10 265.057 130.712   2 
   2  -2  -9 427.930 148.589   2 
   2  -2  -8 1512.07 229.147   2 
  -2   2   7 5226.76 351.922   2 
   2  -2  -7 5462.16 410.184   1 
   2  -2  -7 5105.90 373.229   2 
  -2   2   6 18816.4 617.971   2 
   2  -2  -6 19429.9 722.362   1 
   2  -2  -5 67111.6 1252.50   1 
  -2   2   5 67523.6 1068.24   2 
  -2   2   4 5431.33 277.822   2 
   2  -2  -4 4438.74 303.888   1 
  -2   2   3 29611.4 579.659   2 
   2  -2  -3 26792.2 691.183   1 
   2  -2  -2 135797. 1432.65   1 
   2  -2  -2 135219. 1196.94   3 
  -2   2   2 136635. 1134.65   2 
   2  -2  -1 149521. 1405.01   1 
   2  -2  -1 151174. 1084.29   3 
   2  -2  -1 155494. 1205.06   2 
  -2   2   1 157068. 1152.20   2 
   2  -2   0 3893.77 184.994   4 
   2  -2   0 3395.70 200.044   1 
  -2   2   0 3269.58 169.409   4 
  -2   2   0 3035.07 194.221   1 
  -2   2   0 3589.19 132.747   3 
  -2   2  -1 60549.7 737.638   4 
   2  -2   1 61854.0 796.153   1 
   2  -2   1 62518.4 714.230   4 
   2  -2   2 86785.3 912.722   1 
  -2   2  -2 87894.3 927.974   4 
  -2   2  -2 88291.8 981.961   1 
   2  -2   3 20315.8 443.612   4 
  -2   2  -3 19986.3 482.683   4 
  -2   2  -4 51849.2 839.504   4 
   2  -2   4 54100.4 810.368   4 
   2  -2   5 130053. 1391.57   4 
  -2   2  -5 127240. 1421.26   4 
  -2   2  -5 128837. 1437.33   2 
  -2   2  -6 20178.2 623.864   2 
  -2   2  -6 20813.4 619.658   4 
  -2   2  -7 8668.02 433.101   4 
  -2   2  -7 8216.31 438.850   2 
  -2   2  -8 59282.3 1197.73   4 
  -2   2  -8 59188.7 1254.52   2 
  -2   2  -9 17378.7 734.894   2 
  -2   2 -10 10494.4 611.195   2 
  -2   2 -11 1367.26 256.315   2 
  -2   2 -12 809.471 213.686   2 
  -2   2 -13 621.336 215.839   2 
  -2   2 -14 25.0345 90.5488   2 
   2  -1 -14 112.430 191.336   2 
   2  -1 -14-439.524 211.051   3 
   2  -1 -13 68.7908 163.651   2 
   2  -1 -13 200.055 172.775   3 
   2  -1 -12 258.406 176.134   3 
   2  -1 -12 437.730 216.937   2 
   2  -1 -11 231.610 173.700   2 
   2  -1 -11 55.7976 143.587   3 
   2  -1 -10 863.499 217.498   2 
   2  -1 -10 191.167 130.972   3 
   2  -1  -9 1022.00 202.659   2 
   2  -1  -9 756.186 193.433   3 
   2  -1  -8 7434.95 489.043   1 
   2  -1  -8 7637.19 485.938   2 
  -2   1   7 35076.0 894.210   2 
   2  -1  -7 36811.4 1016.72   1 
  -2   1   6 2084.21 207.040   2 
   2  -1  -6 2219.85 237.052   1 
  -2   1   5 93883.8 1248.43   2 
   2  -1  -5 89373.8 1362.67   1 
  -2   1   4 20841.2 544.345   2 
   2  -1  -4 19295.6 588.350   1 
   2  -1  -3 47941.8 839.026   1 
  -2   1   3 49513.8 777.918   2 
  -2   1   2 11018.4 333.145   3 
   2  -1  -2 11137.3 368.379   1 
  -2   1   2 11335.6 357.369   2 
  -2   1   1 49960.6 648.405   3 
  -2   1   1 51575.0 709.176   1 
  -2   1   1 51683.0 727.443   2 
   2  -1  -1 51204.0 708.012   1 
  -2   1   0 349797. 1741.75   1 
   2  -1   0 352420. 1690.52   1 
  -2   1  -1 782508. 2871.17   4 
   2  -1   1 783184. 2261.74   1 
  -2   1  -2 3946.45 171.861   1 
  -2   1  -2 3861.43 213.020   4 
  -2   1  -3 33148.1 658.680   4 
  -2   1  -4 6127.65 307.156   4 
  -2   1  -5 18393.8 565.953   4 
  -2   1  -5 17122.7 545.072   2 
  -2   1  -6 8351.20 414.080   4 
  -2   1  -6 9304.41 438.651   2 
  -2   1  -7 620.640 125.534   4 
  -2   1  -7 388.260 124.981   2 
  -2   1  -8 1162.06 199.161   2 
  -2   1  -9 17420.6 754.279   2 
  -2   1 -10 1748.34 285.451   2 
  -2   1 -11 957.007 221.803   2 
  -2   1 -12-90.9140 177.624   2 
  -2   1 -13-107.316 127.317   2 
  -2   1 -14 230.532 174.689   2 
   2   0 -14 5.50862 108.010   2 
   2   0 -14-0.82107 106.713   3 
   2   0 -13 458.158 201.489   2 
   2   0 -13 648.784 229.883   3 
   2   0 -12 2035.68 337.912   2 
   2   0 -12 2647.72 389.671   3 
   2   0 -11 6463.42 547.301   3 
   2   0 -11 6514.13 535.256   2 
   2   0 -10 20058.6 917.931   3 
   2   0 -10 20693.7 901.318   2 
   2   0  -9-42.3278 107.779   3 
   2   0  -9 63.1394 108.259   2 
  -2   0   8 5430.69 378.195   2 
   2   0  -8 5114.34 411.885   3 
   2   0  -8 5219.48 408.515   2 
  -2   0   7 345.320 105.878   2 
  -2   0   6 6166.44 349.232   2 
  -2   0   5 47489.8 898.149   2 
  -2   0   4 83302.8 1115.98   2 
  -2   0   3 1333.54 136.370   3 
  -2   0   3 1378.46 142.963   2 
  -2   0   2 4959.82 242.127   3 
   2   0  -2 5069.11 225.533   1 
  -2   0   2 4699.77 245.569   2 
  -2   0   1 19584.0 477.231   4 
  -2   0   1 19031.3 476.529   2 
   2   0  -1 19394.3 371.319   1 
  -2   0   0 372625. 2099.12   4 
  -2   0   0 374736. 1246.10   1 
  -2   0  -1 117945. 1201.19   4 
  -2   0  -2 54772.7 844.933   4 
  -2   0  -2 53585.9 458.290   1 
  -2   0  -3 245.598 73.3746   4 
  -2   0  -4 45366.5 877.511   4 
  -2   0  -5 5148.85 313.029   4 
  -2   0  -6 3531.15 283.957   4 
  -2   0  -6 3467.01 283.977   2 
  -2   0  -7 9490.76 493.138   2 
  -2   0  -7 9825.50 490.383   4 
  -2   0  -8 7722.79 477.658   2 
  -2   0  -9 868.385 198.535   2 
  -2   0 -10 11068.0 656.564   2 
  -2   0 -11 1228.36 245.447   2 
  -2   0 -12 1931.01 333.597   2 
  -2   0 -13 2045.55 347.867   2 
   2   1 -14-139.832 173.615   2 
   2   1 -14-128.409 130.914   3 
   2   1 -13 110.310 141.029   2 
   2   1 -13 307.687 190.330   3 
   2   1 -12 4139.72 458.421   2 
   2   1 -12 4080.37 470.841   3 
   2   1 -11 2034.30 308.968   2 
   2   1 -11 2759.91 383.236   3 
   2   1 -10 181.890 165.166   3 
   2   1 -10 548.851 177.330   2 
   2   1  -9 545.644 171.461   3 
   2   1  -9 403.328 167.526   2 
  -2  -1   8 16481.8 650.729   2 
   2   1  -8 16884.2 738.901   3 
   2   1  -8 16220.7 706.908   2 
  -2  -1   7 44114.0 994.221   2 
  -2  -1   6 20277.1 634.843   2 
  -2  -1   5 31997.6 746.306   2 
  -2  -1   4 25054.9 653.815   3 
  -2  -1   4 23461.3 619.017   2 
  -2  -1   3 20616.4 556.673   3 
  -2  -1   3 19329.0 540.255   2 
  -2  -1   2 6823.31 314.600   2 
  -2  -1   1 489323. 2543.25   4 
  -2  -1   0 108235. 1211.14   4 
  -2  -1  -1 3598.58 229.622   4 
  -2  -1  -2 779.133 112.738   4 
  -2  -1  -3 76485.7 1136.64   4 
  -2  -1  -3 75465.5 665.345   1 
  -2  -1  -4 1593.10 174.919   4 
  -2  -1  -4 71.1198 38.7805   1 
  -2  -1  -5 837.047 141.180   4 
  -2  -1  -5 780.493 109.124   1 
  -2  -1  -6 51071.5 1089.12   4 
  -2  -1  -6 52111.4 913.055   1 
  -2  -1  -7 8975.61 493.920   2 
  -2  -1  -7 9016.96 420.786   1 
  -2  -1  -8 210.342 90.4844   1 
  -2  -1  -8 201.142 125.196   2 
  -2  -1  -9 1002.77 178.966   1 
  -2  -1  -9 1248.51 232.159   2 
  -2  -1 -10 5233.48 470.252   2 
  -2  -1 -10 5577.76 421.730   1 
  -2  -1 -11 2664.57 356.592   2 
  -2  -1 -12 312.155 150.799   2 
  -2  -1 -13 5.70441 122.173   2 
   2   2 -15 186.352 184.354   3 
   2   2 -14 188.401 143.511   3 
   2   2 -14 19.4101 127.196   2 
   2   2 -13 906.594 250.960   2 
   2   2 -13 1118.83 283.034   3 
   2   2 -12-80.8940 108.818   2 
   2   2 -12-31.3967 123.876   3 
   2   2 -11 499.550 170.683   2 
   2   2 -11 615.925 207.542   3 
   2   2 -10 7778.81 573.824   3 
   2   2 -10 7546.62 556.804   2 
   2   2  -9 7489.16 529.463   3 
   2   2  -9 7621.02 527.088   2 
  -2  -2   8 2561.37 260.634   2 
   2   2  -8 2484.69 297.738   3 
   2   2  -8 2442.92 294.124   2 
  -2  -2   7 17806.4 635.437   2 
   2   2  -7 17009.5 715.736   3 
   2   2  -7 17149.2 708.515   2 
  -2  -2   6 31678.2 800.775   2 
   2   2  -6 33415.8 923.067   2 
  -2  -2   5 9465.06 439.008   3 
  -2  -2   5 9294.74 416.868   2 
  -2  -2   4 125330. 1487.90   2 
  -2  -2   4 129019. 1551.93   3 
  -2  -2   3 109476. 1363.01   2 
  -2  -2   2 144373. 1522.39   2 
  -2  -2   1 88960.7 1151.69   4 
   2   2   0 32757.8 403.231   1 
  -2  -2   0 33277.8 707.533   4 
  -2  -2  -1 22846.1 600.468   4 
   2   2   1 23785.8 311.016   1 
  -2  -2  -2 58507.5 519.993   1 
  -2  -2  -2 59169.1 1004.89   4 
  -2  -2  -3 534.008 103.401   4 
  -2  -2  -3 532.869 66.1583   1 
  -2  -2  -4 21988.7 678.031   4 
  -2  -2  -4 22122.1 482.086   1 
  -2  -2  -5 9116.98 358.034   1 
  -2  -2  -5 9240.56 467.573   4 
  -2  -2  -6 1017.92 138.570   1 
  -2  -2  -6 1099.44 175.476   4 
   2   2   7 27.7884 106.858   4 
  -2  -2  -7 172.294 112.859   2 
  -2  -2  -7 240.112 82.8523   1 
  -2  -2  -8 910.649 204.336   2 
  -2  -2  -8 753.535 146.118   1 
  -2  -2  -9 2149.03 256.877   1 
  -2  -2  -9 2073.07 290.281   2 
  -2  -2 -10 3167.24 383.874   2 
  -2  -2 -11 753.083 223.507   2 
  -2  -2 -12 380.680 168.055   2 
  -2  -2 -13 61.0582 127.820   2 
   2   3 -15 1161.54 291.125   3 
   2   3 -14 483.197 203.245   2 
   2   3 -14-64.8989 172.027   3 
   2   3 -13 1088.05 270.295   2 
   2   3 -13 586.172 209.059   3 
   2   3 -12 393.468 187.743   2 
   2   3 -12-348.842 169.115   3 
   2   3 -11-8.40587 140.408   2 
   2   3 -11-264.276 211.215   3 
   2   3 -10 1514.62 280.749   2 
   2   3 -10 1474.58 275.088   3 
   2   3  -9 792.845 201.478   3 
   2   3  -9 932.323 201.238   2 
   2   3  -8 80.4483 90.7866   2 
  -2  -3   8-26.9556 61.2696   2 
   2   3  -7 607.143 158.207   2 
  -2  -3   7 823.153 144.213   2 
  -2  -3   6 1603.94 204.944   3 
   2   3  -6 1795.85 231.539   2 
  -2  -3   6 2048.64 218.610   2 
  -2  -3   5 2047.51 206.067   2 
  -2  -3   5 2389.82 238.758   3 
   2   3  -5 1989.04 229.305   2 
  -2  -3   4 2661.10 241.085   3 
   2   3  -4 3049.09 271.055   2 
  -2  -3   4 2755.09 237.093   2 
  -2  -3   3 63101.5 1076.67   2 
   2   3  -3 64481.8 1076.25   4 
   2   3  -2 33755.3 756.181   4 
  -2  -3   2 33889.8 780.325   2 
   2   3  -1 3450.60 241.042   4 
  -2  -3   1 3566.31 245.140   4 
   2   3  -1 3492.89 185.861   1 
   2   3   0 63845.0 744.901   1 
   2   3   0 65515.7 1006.88   4 
  -2  -3   0 65425.5 1049.95   4 
   2   3   1 16356.1 369.648   1 
  -2  -3  -1 16128.7 537.670   4 
  -2  -3  -1 16312.2 328.857   1 
   2   3   1 16245.9 513.531   4 
  -2  -3  -2 32265.9 499.293   1 
   2   3   2 32836.1 736.398   4 
  -2  -3  -2 32120.4 781.873   4 
   2   3   2 33424.3 521.003   1 
   2   3   3 57456.3 1013.41   4 
  -2  -3  -3 60714.4 1125.18   4 
  -2  -3  -3 59424.2 770.965   1 
   2   3   3 60070.1 727.449   1 
  -2  -3  -4 2510.20 183.628   1 
   2   3   4 2304.59 221.912   4 
  -2  -3  -4 2308.83 239.243   4 
  -2  -3  -5 986.230 131.124   1 
   2   3   5 1096.18 163.818   4 
  -2  -3  -5 843.580 159.450   4 
  -2  -3  -6 63.8915 54.9386   1 
   2   3   6 430.582 120.895   4 
   2   3   7 6238.09 422.337   4 
  -2  -3  -7 6498.23 388.541   1 
  -2  -3  -7 6041.49 434.743   2 
  -2  -3  -8 619.196 175.568   2 
  -2  -3  -8 779.490 146.664   1 
  -2  -3  -9 3938.52 401.367   2 
  -2  -3  -9 3855.15 343.311   1 
  -2  -3 -10 135.446 136.762   2 
  -2  -3 -11 537.871 210.332   2 
  -2  -3 -12 30.9234 182.215   2 
   2   4 -14 78.0129 103.982   2 
   2   4 -13-43.9670 142.916   2 
   2   4 -12 421.304 179.892   2 
   2   4 -11 7466.05 608.777   2 
   2   4 -10 8701.35 611.988   2 
   2   4  -9 438.366 146.494   2 
   2   4  -8 622.249 164.261   2 
  -2  -4   7 7312.02 451.837   3 
   2   4  -7 6789.48 464.149   2 
  -2  -4   7 7199.91 413.123   2 
  -2  -4   6 15038.1 627.552   3 
   2   4  -6 15813.3 666.054   2 
  -2  -4   6 15894.6 598.720   2 
   2   4  -5 3006.72 281.507   2 
  -2  -4   5 3227.76 284.743   3 
  -2  -4   5 3328.27 269.569   2 
   2   4  -4 16852.7 586.901   4 
  -2  -4   4 17135.7 599.111   2 
   2   4  -3 14834.3 534.346   4 
  -2  -4   3 14857.4 550.847   2 
   2   4  -2 1738.34 177.606   4 
   2   4  -2 2059.71 180.375   1 
  -2  -4   2 1943.60 192.391   4 
  -2  -4   2 2181.70 212.646   2 
   2   4  -1 27203.1 691.321   4 
   2   4  -1 25815.3 590.507   1 
  -2  -4   1 26034.9 691.732   4 
   2   4   0 133155. 1301.36   1 
   2   4   0 135245. 1514.90   4 
  -2  -4  -1 70037.0 1187.38   4 
   2   4   1 69992.3 1091.01   4 
   2   4   1 69506.3 937.076   1 
  -2  -4  -1 69759.2 843.197   1 
  -2  -4  -2 117915. 1163.25   1 
   2   4   2 118330. 1450.81   4 
  -2  -4  -2 120847. 1609.39   4 
   2   4   2 121087. 1227.87   1 
   2   4   3 71173.4 1168.36   4 
  -2  -4  -3 72659.3 1300.98   4 
  -2  -4  -3 72893.3 968.875   1 
   2   4   3 70354.0 953.722   1 
  -2  -4  -4 9054.32 378.918   1 
  -2  -4  -4 9489.22 492.041   4 
   2   4   4 9274.20 448.403   4 
   2   4   5 2033.55 233.427   4 
  -2  -4  -5 1871.96 233.843   4 
  -2  -4  -5 1542.78 176.781   1 
  -2  -4  -6 9495.05 454.998   1 
   2   4   6 9676.06 512.136   4 
   2   4   7 1455.65 223.062   4 
  -2  -4  -7 1851.11 254.993   2 
  -2  -4  -7 1371.98 188.245   1 
  -2  -4  -8 1338.56 238.557   2 
  -2  -4  -8 1236.05 193.455   1 
  -2  -4  -9 1177.86 235.904   2 
  -2  -4 -10 493.239 205.453   2 
  -2  -4 -11 115.128 123.038   2 
  -2  -4 -12-80.1633 129.549   2 
   2   5 -14 383.887 173.782   2 
   2   5 -13 930.621 260.406   2 
   2   5 -12-85.2028 160.091   2 
   2   5 -11 357.088 153.754   2 
   2   5 -10 57.1114 111.951   2 
   2   5  -9-41.9266 136.906   2 
   2   5  -8 2603.99 316.575   2 
  -2  -5   7 7314.52 468.721   3 
   2   5  -7 6709.95 473.959   2 
  -2  -5   7 8030.67 445.110   2 
  -2  -5   6 16726.8 682.972   3 
   2   5  -6 15421.0 679.390   2 
  -2  -5   6 17118.1 633.548   2 
  -2  -5   5 194.283 82.3974   2 
  -2  -5   5 207.885 70.9979   3 
   2   5  -5 158.911 95.4079   4 
  -2  -5   4 139.532 76.5143   2 
   2   5  -4 127.704 79.9771   4 
   2   5  -3 97.5586 78.2070   4 
  -2  -5   3 116.731 62.0966   2 
  -2  -5   2 24849.9 693.276   4 
   2   5  -2 24957.9 678.629   1 
   2   5  -2 24422.7 679.637   4 
  -2  -5   2 25641.6 745.827   2 
   2   5  -1 42273.1 855.336   1 
   2   5  -1 42605.9 878.920   4 
  -2  -5   1 42940.5 922.728   4 
  -2  -5   0 30034.4 802.997   4 
   2   5   0 31401.3 752.583   4 
   2   5   0 30589.6 719.835   1 
   2   5   1 4035.12 275.941   4 
  -2  -5  -1 3897.64 300.677   4 
  -2  -5  -1 4596.99 254.642   1 
   2   5   1 4105.27 270.874   1 
   2   5   2 9842.37 411.973   1 
   2   5   2 9743.29 438.855   4 
  -2  -5  -2 9704.23 485.957   4 
  -2  -5  -2 9688.36 380.612   1 
   2   5   3 1225.25 169.508   4 
  -2  -5  -3 1257.30 193.239   4 
  -2  -5  -3 1252.00 146.256   1 
   2   5   3 1181.06 151.766   1 
  -2  -5  -4 464.711 99.9780   1 
  -2  -5  -4 347.718 112.112   4 
   2   5   4 449.816 132.695   4 
   2   5   4 501.362 110.170   1 
  -2  -5  -5 16706.4 596.222   1 
   2   5   5 17802.7 680.325   4 
   2   5   6 2701.69 288.916   4 
  -2  -5  -6 2599.96 255.378   1 
  -2  -5  -7 1964.16 281.964   2 
  -2  -5  -7 1622.01 216.292   1 
  -2  -5  -8-80.9364 83.7446   1 
  -2  -5  -8-41.0879 138.582   2 
  -2  -5  -9 1199.96 241.443   2 
  -2  -5 -10 37.6865 126.244   2 
  -2  -5 -11 91.7799 136.562   2 
   2   6 -14-168.379 153.372   2 
   2   6 -13 369.697 199.456   2 
   2   6 -12 2091.91 360.814   2 
   2   6 -11 826.981 222.895   2 
   2   6 -10 66.8665 122.632   2 
   2   6  -9-106.444 146.284   2 
   2   6  -8 1792.13 270.855   2 
   2   6  -7 2295.56 288.394   2 
  -2  -6   7 2470.75 257.426   2 
  -2  -6   6 1613.80 228.705   3 
   2   6  -6 1948.78 242.612   4 
  -2  -6   6 1753.12 215.468   2 
   2   6  -5 116.588 81.7898   4 
  -2  -6   5 28.4178 57.2753   2 
   2   6  -4 4529.77 325.604   4 
   2   6  -4 4781.75 359.262   1 
  -2  -6   4 4643.42 334.927   2 
  -2  -6   3 937.031 158.701   2 
   2   6  -3 960.303 150.642   4 
   2   6  -2 5059.37 321.190   4 
  -2  -6   2 4646.95 314.238   4 
  -2  -6   2 5147.48 355.286   2 
  -2  -6   1 211.462 89.7845   4 
   2   6  -1 273.072 90.5701   4 
   2   6   0 12308.1 520.383   1 
  -2  -6   0 12284.7 541.618   4 
   2   6   0 12521.6 501.714   4 
  -2  -6  -1 138.093 72.6179   1 
   2   6   1 103.407 85.7687   4 
   2   6   1 149.199 83.2602   1 
  -2  -6  -1 229.323 97.6394   4 
   2   6   2 75.8000 75.2093   1 
  -2  -6  -2 15.5507 66.2914   4 
   2   6   2 14.8893 74.6860   4 
  -2  -6  -2 68.9188 58.8625   1 
   2   6   3 5269.21 350.813   4 
  -2  -6  -3 5253.17 389.614   4 
  -2  -6  -3 5033.69 317.082   1 
   2   6   3 4961.41 331.551   1 
  -2  -6  -4 2697.67 245.095   1 
   2   6   4 2854.07 276.330   4 
   2   6   5 119.083 111.836   4 
  -2  -6  -5-4.66183 67.2450   1 
   2   6   6 307.914 97.7150   4 
  -2  -6  -6 260.460 101.930   1 
  -2  -6  -7 152.224 77.0946   1 
  -2  -6  -7 169.326 137.271   2 
  -2  -6  -8 157.335 131.376   2 
  -2  -6  -9-45.4320 125.429   2 
  -2  -6 -10 64.3829 101.727   2 
  -2  -6 -11 160.569 155.500   2 
   2   7 -14-33.5204 127.432   2 
   2   7 -13 137.657 134.512   2 
   2   7 -12 1342.35 301.227   2 
   2   7 -11 357.252 198.638   2 
   2   7 -10 660.267 199.395   2 
   2   7  -9 23.0683 123.018   2 
   2   7  -8 849.610 197.709   2 
   2   7  -8 1319.91 237.877   4 
   2   7  -7 3747.97 341.569   4 
  -2  -7   7 4101.53 331.893   2 
   2   7  -6 635.135 165.288   1 
   2   7  -6 1044.74 182.789   4 
  -2  -7   6 1175.97 179.769   2 
   2   7  -5 4255.33 335.962   4 
  -2  -7   5 4436.50 347.559   2 
   2   7  -5 4505.25 391.745   1 
   2   7  -4 5389.50 357.600   4 
   2   7  -4 6051.51 437.851   1 
  -2  -7   4 5765.82 385.524   2 
   2   7  -3 9023.01 516.435   1 
   2   7  -3 8946.40 449.028   4 
  -2  -7   3 9030.43 482.333   2 
  -2  -7   2 14228.5 566.071   4 
   2   7  -2 14599.1 549.857   4 
   2   7  -2 14179.6 624.537   1 
  -2  -7   2 13880.5 600.338   2 
   2   7  -1 515.610 113.504   4 
  -2  -7   1 424.297 112.055   4 
   2   7   0 2606.42 240.112   4 
  -2  -7   0 2405.04 253.828   4 
   2   7   1 108.950 74.5929   4 
  -2  -7  -1 136.872 84.4839   4 
  -2  -7  -1 13.5547 52.5638   1 
   2   7   2 631.933 139.020   4 
  -2  -7  -2 1227.53 200.118   4 
  -2  -7  -2 1022.47 155.474   1 
  -2  -7  -3 103.486 67.1188   1 
   2   7   3-56.9378 101.807   4 
   2   7   4 146.751 102.738   4 
  -2  -7  -4 288.470 107.708   1 
   2   7   5 3755.66 349.571   4 
  -2  -7  -5 3583.42 311.778   1 
   2   7   5 4160.74 341.050   1 
   2   7   6-27.8142 111.861   4 
  -2  -7  -6 11.4298 99.2933   2 
  -2  -7  -6-55.4024 78.6072   1 
  -2  -7  -7 1261.47 232.055   2 
  -2  -7  -8 276.906 160.201   2 
  -2  -7  -9-89.2369 126.421   2 
  -2  -7 -10 274.586 170.752   2 
   2   8 -14-439.104 203.639   2 
   2   8 -13-658.742 212.031   2 
   2   8 -12 540.649 225.123   2 
   2   8 -11 727.600 214.997   2 
   2   8 -10 1614.55 269.889   4 
   2   8 -10 1459.62 281.566   2 
   2   8  -9 1079.19 215.375   4 
   2   8  -8 6540.88 554.330   1 
   2   8  -8 6384.97 469.505   4 
   2   8  -7 4300.93 367.304   4 
   2   8  -7 5241.28 475.349   1 
   2   8  -6 1216.48 250.506   1 
  -2  -8   6 1589.88 212.812   2 
   2   8  -6 1634.11 227.360   4 
   2   8  -5 13145.0 589.698   4 
   2   8  -5 14418.4 734.201   1 
  -2  -8   5 14001.5 619.972   2 
  -2  -8   4-94.2843 128.129   2 
   2   8  -4-79.6193 114.841   4 
   2   8  -4 46.8019 117.271   1 
   2   8  -3 2755.67 254.887   4 
   2   8  -3 3034.34 328.634   1 
  -2  -8   3 2445.12 263.551   2 
   2   8  -2 56.7443 108.023   1 
   2   8  -2 131.018 90.7297   4 
  -2  -8   2 41.0703 72.3503   2 
  -2  -8   1 231.162 94.9212   4 
   2   8  -1 149.345 107.124   1 
   2   8  -1 244.762 90.2594   4 
   2   8   0 4638.19 321.082   4 
   2   8   0 4168.91 368.158   1 
  -2  -8   0 4529.75 363.952   4 
   2   8   1 203.034 97.2356   4 
  -2  -8  -1 84.0750 93.6988   4 
   2   8   1 196.358 100.881   1 
   2   8   2 145.101 85.3150   4 
  -2  -8  -2 263.420 77.3109   4 
  -2  -8  -2 299.871 101.563   1 
   2   8   2 484.852 146.164   1 
  -2  -8  -3 6679.05 421.011   1 
   2   8   3 7700.38 456.678   4 
   2   8   3 7295.22 480.303   1 
  -2  -8  -4 234.077 112.845   1 
   2   8   4 260.641 134.989   4 
   2   8   4 251.732 118.783   1 
   2   8   5 12.8648 91.7773   4 
   2   8   5 69.6948 93.7129   1 
  -2  -8  -6 232.494 131.493   2 
  -2  -8  -7-11.9142 105.839   2 
  -2  -8  -8-129.216 121.150   2 
  -2  -8  -9-95.5435 149.816   2 
   2   9 -13-190.248 155.606   2 
   2   9 -12-31.9034 99.1865   4 
   2   9 -12-3.46824 112.580   1 
   2   9 -11 450.296 158.165   4 
   2   9 -11 230.970 180.308   1 
   2   9 -10 701.745 188.053   4 
   2   9 -10 1485.46 333.693   1 
   2   9  -9 934.662 207.237   4 
   2   9  -9 1387.22 291.988   1 
   2   9  -8 212.422 139.207   1 
   2   9  -8 14.2224 74.1701   4 
   2   9  -7 1963.17 255.663   4 
   2   9  -7 1847.37 314.337   1 
   2   9  -6 477.906 197.665   1 
   2   9  -6 345.611 131.975   4 
  -2  -9   5 512.876 139.191   2 
   2   9  -5 448.588 121.173   4 
   2   9  -5 356.101 175.579   1 
  -2  -9   4-93.7174 72.6344   2 
   2   9  -4-14.6053 83.8370   4 
   2   9  -4 41.3318 117.605   1 
  -2  -9   3-35.5592 86.7727   2 
   2   9  -3 29.9970 102.985   1 
   2   9  -3-249.331 98.9898   4 
   2   9  -2 510.634 170.152   1 
   2   9  -2 462.736 123.315   4 
  -2  -9   2 250.575 106.558   2 
  -2  -9   1 122.265 71.1284   4 
   2   9  -1 224.267 119.876   1 
   2   9  -1 445.024 115.698   4 
   2   9   0-53.0171 84.1204   4 
   2   9   0-48.6908 116.079   1 
  -2  -9   0 61.5022 58.9132   4 
  -2  -9  -1 1271.01 206.517   4 
   2   9   1 1393.04 240.162   1 
   2   9   1 1154.04 180.702   4 
   2   9   2 18.8647 95.6628   1 
   2   9   2 70.1106 89.8318   4 
   2   9   3 2483.58 273.343   4 
   2   9   3 2739.60 322.262   1 
   2   9   4 1618.36 231.827   4 
   2   9   4 1383.44 240.086   1 
  -2  -9  -5 130.133 118.902   2 
   2   9   5-28.2010 85.2285   1 
   2   9   6-30.7904 101.005   1 
  -2  -9  -6-2.50211 110.320   2 
  -2  -9  -7 5.49871 91.9923   2 
  -2  -9  -8 206.880 138.763   2 
  -2  -9  -9 265.032 168.126   2 
   2  10 -11 237.406 189.525   1 
   2  10 -10 4.98201 112.058   1 
   2  10  -9 441.065 198.117   1 
   2  10  -8 2431.74 287.449   4 
   2  10  -8 2420.57 389.390   1 
   2  10  -7 494.049 207.580   1 
   2  10  -7 669.671 161.346   4 
   2  10  -6 222.673 113.066   4 
   2  10  -6 244.970 162.759   1 
   2  10  -5 671.843 139.517   4 
   2  10  -5 652.658 207.582   1 
   2  10  -4 1562.16 282.187   1 
   2  10  -4 2047.76 227.901   4 
   2  10  -3 638.691 179.980   1 
   2  10  -3 858.655 149.396   4 
   2  10  -2 322.358 103.910   4 
   2  10  -2 359.984 169.019   1 
   2  10  -1 533.904 121.892   4 
   2  10  -1 643.639 190.913   1 
   2  10   0 2546.79 251.938   4 
   2  10   0 2082.45 306.756   1 
   2  10   1-15.7518 80.9409   4 
   2  10   1-113.150 126.834   1 
   2  10   2 1234.02 242.391   1 
   2  10   2 845.748 160.417   4 
   2  10   3 166.125 119.793   4 
   2  10   3 19.0408 119.278   1 
   2  10   4 1061.35 219.728   1 
  -2 -10  -5 34.2509 97.3869   2 
   2  10   5-37.5823 96.2673   1 
  -2 -10  -6-87.9165 122.518   2 
  -2 -10  -7-107.698 139.257   2 
  -2 -10  -8 96.2721 116.278   2 
   2  11  -9-71.8283 138.160   1 
   2  11  -8-1.65729 159.773   1 
   2  11  -7 70.0841 214.406   1 
   2  11  -6-57.3530 130.129   1 
   2  11  -5 1407.29 302.022   1 
   2  11  -4 678.785 240.500   1 
   2  11  -3 49.8949 161.602   1 
   2  11  -2-6.75359 69.3602   4 
   2  11  -2-25.4439 112.491   1 
   2  11  -1 1551.57 197.757   4 
   2  11  -1 1701.03 306.333   1 
   2  11   0 742.187 144.731   4 
   2  11   0 760.832 215.157   1 
   2  11   1-21.7927 116.135   1 
   2  11   1 106.346 78.7575   4 
   2  11   2 57.0751 113.358   1 
   2  11   2 169.909 100.995   4 
   2  11   3 772.767 208.121   1 
  -2 -11  -4 7.92859 111.828   2 
  -2 -11  -5-2.04429 106.202   2 
  -2 -11  -6 44.2073 98.4691   2 
   2  12  -8 574.338 251.125   1 
   2  12  -7 1671.49 361.197   1 
   2  12  -6 1604.15 343.745   1 
   2  12  -5 19.9796 159.636   1 
   2  12  -4 124.266 143.068   1 
   2  12  -3-71.7871 124.981   1 
   2  12  -2-283.226 160.755   1 
   2  12  -1 11.4551 140.634   1 
   2  12   0 128.768 134.867   1 
   2  12   1 43.5011 119.358   1 
   2  12   2 510.618 179.704   1 
   2  13  -6 602.039 227.596   1 
   2  13  -5 735.974 272.615   1 
   2  13  -4-175.583 154.294   1 
   2  13  -3 143.200 160.173   1 
   2  13  -2-115.690 151.861   1 
   2  13  -1-108.101 142.651   1 
   2  13   0 273.113 177.265   1 
  -3  13   2 177.368 152.833   1 
  -3  13   1-203.519 187.768   1 
  -3  13   0 2.86132 171.206   1 
  -3  13  -1 2.84061 158.174   1 
  -3  13  -2-425.097 222.913   1 
  -3  13  -3 587.469 222.090   1 
  -3  13  -4 834.280 285.873   1 
  -3  12   5 391.263 197.518   1 
  -3  12   4 291.627 167.008   1 
  -3  12   3-168.242 164.523   1 
  -3  12   2 1267.06 320.453   1 
  -3  12   1 134.083 166.328   1 
  -3  12   0 797.606 252.266   1 
  -3  12  -1 615.511 223.443   1 
  -3  12  -2 30.6919 149.061   1 
  -3  12  -3 191.081 177.051   1 
  -3  12  -4-136.566 166.696   1 
  -3  12  -5 138.344 121.544   1 
  -3  12  -6-154.518 215.410   1 
  -3  12  -7 324.627 205.711   1 
  -3  11   7 23.0204 149.915   1 
  -3  11   6-63.0200 143.454   1 
  -3  11   5 475.220 194.322   1 
  -3  11   4 1964.29 374.332   1 
  -3  11   3-46.2394 131.224   1 
  -3  11   2 149.645 166.359   1 
  -3  11   1 1193.94 307.791   1 
  -3  11   0 4140.85 506.254   1 
  -3  11  -1-124.266 198.912   1 
  -3  11  -2 2222.89 377.723   1 
  -3  11  -3-0.77374 157.329   1 
  -3  11  -4 1578.51 313.133   1 
  -3  11  -5 1337.37 289.636   1 
  -3  11  -6 106.766 121.511   1 
  -3  11  -7-41.7538 129.757   1 
  -3  11  -8 826.169 260.842   1 
  -3  11  -9 713.739 238.949   1 
  -3  10   8 2400.72 402.542   1 
  -3  10   7 411.480 174.201   1 
   3 -10  -6-81.1584 84.8442   2 
  -3  10   6-67.3471 117.051   1 
  -3  10   5 447.908 194.349   1 
   3 -10  -5 635.318 132.595   2 
   3 -10  -4 454.772 105.507   2 
  -3  10   4 598.875 222.293   1 
   3 -10  -3 5064.19 262.767   2 
  -3  10   3 5437.54 563.718   1 
  -3  10   2 18095.4 991.942   1 
  -3  10   1 20295.2 1044.91   1 
  -3  10   0 4669.91 505.641   1 
  -3  10  -1-33.1341 167.367   1 
  -3  10  -2 5509.99 548.839   1 
  -3  10  -3 18217.9 984.234   1 
  -3  10  -4 1026.59 260.776   1 
  -3  10  -5 1071.02 269.517   1 
  -3  10  -6 208.122 143.987   1 
  -3  10  -7 3361.69 461.581   1 
  -3  10  -8 25.9382 118.223   1 
  -3  10  -9 2329.65 402.520   1 
  -3  10 -10 477.131 208.431   1 
   3  -9 -11 273.781 156.787   2 
   3  -9 -10 221.908 147.973   2 
   3  -9  -9 1230.03 257.417   2 
   3  -9  -8-38.1999 87.5886   2 
  -3   9   8 148.181 166.349   1 
   3  -9  -7 997.962 190.109   2 
  -3   9   7 821.200 235.772   1 
   3  -9  -6 144.044 91.9018   2 
  -3   9   6 184.943 164.626   1 
   3  -9  -5 1288.55 163.336   4 
  -3   9   5 1077.61 263.704   1 
   3  -9  -4 8304.47 375.471   4 
  -3   9   4 9210.23 693.143   1 
   3  -9  -3 489.349 98.8205   2 
   3  -9  -3 498.016 90.8444   4 
  -3   9   3 457.232 193.957   1 
   3  -9  -2 329.452 58.7494   2 
   3  -9  -2 479.660 72.6403   4 
  -3   9   2 335.391 147.740   1 
  -3   9   1 626.718 190.074   1 
   3  -9  -1 508.907 53.6881   4 
  -3   9   0-94.9918 189.566   1 
  -3   9  -1-798.319 229.472   1 
  -3   9  -2 403.984 176.100   1 
  -3   9  -3 1891.84 316.875   1 
  -3   9  -4 7339.26 606.471   1 
  -3   9  -5 112.003 165.262   1 
  -3   9  -6 1623.71 302.406   1 
  -3   9  -6 1313.57 93.9193   2 
  -3   9  -7-3.49275 37.2273   2 
  -3   9  -7 199.104 164.420   1 
  -3   9  -8 2037.51 335.210   1 
  -3   9  -9 1622.74 322.309   1 
  -3   9 -10 261.890 125.502   1 
  -3   9 -11-67.4651 123.248   1 
  -3   9 -12 57.3544 165.463   1 
   3  -8 -12 181.311 110.274   2 
   3  -8 -11 34.7831 119.823   2 
   3  -8 -10 1606.34 290.532   2 
   3  -8  -9 233.665 128.037   2 
   3  -8  -8 914.617 196.324   2 
  -3   8   8 1014.86 261.653   1 
   3  -8  -7 31.2649 96.6126   2 
  -3   8   7 136.077 161.877   1 
   3  -8  -6 1991.09 221.255   4 
  -3   8   6 2583.07 368.438   1 
   3  -8  -6 1903.82 235.249   2 
   3  -8  -5 7694.66 397.262   4 
  -3   8   5 7847.88 619.392   1 
   3  -8  -4 65.1692 61.2489   4 
   3  -8  -4 198.976 100.001   2 
  -3   8   4 155.145 134.736   1 
   3  -8  -3 4789.19 253.296   4 
   3  -8  -3 4803.06 278.039   2 
  -3   8   3 4678.08 466.563   1 
  -3   8   2 575.976 178.744   1 
   3  -8  -2 681.571 84.6405   4 
   3  -8  -2 517.219 78.2625   2 
  -3   8   1 77.0180 102.826   1 
   3  -8  -1-10.3933 21.9719   4 
   3  -8  -1 38.7642 25.7203   4 
  -3   8   0 209.624 130.258   1 
  -3   8  -1 609.988 188.980   1 
  -3   8  -2 3674.38 400.131   1 
  -3   8  -3 11026.1 675.471   1 
  -3   8  -4 19756.4 915.490   1 
  -3   8  -5 19413.5 326.995   4 
  -3   8  -5 21697.7 964.645   1 
  -3   8  -5 20688.2 377.361   2 
  -3   8  -6 4930.05 237.616   4 
  -3   8  -6 4696.06 244.978   2 
  -3   8  -7 15761.8 495.887   4 
  -3   8  -7 16040.8 868.679   1 
  -3   8  -7 16246.1 519.326   2 
  -3   8  -8 2591.97 369.971   1 
  -3   8  -8 2656.46 240.476   2 
  -3   8  -9 26.9366 75.1124   2 
  -3   8  -9-184.793 143.602   1 
  -3   8 -10 23.8822 151.130   1 
  -3   8 -10-7.77632 94.4273   2 
  -3   8 -11-31.1422 86.2779   2 
  -3   8 -11 98.9240 132.626   1 
  -3   8 -12 254.635 159.014   1 
   3  -7 -12 156.024 161.946   2 
   3  -7 -11 53.9269 127.720   2 
   3  -7 -10 224.356 139.809   2 
   3  -7  -9-54.0438 112.431   2 
   3  -7  -8 1497.97 250.510   2 
  -3   7   7 3952.81 445.312   1 
   3  -7  -7 3193.58 323.172   2 
   3  -7  -6-90.2315 100.663   4 
   3  -7  -6 82.3362 95.4562   2 
  -3   7   6-83.2056 187.129   1 
   3  -7  -5 3816.28 281.240   4 
  -3   7   5 3158.98 380.376   1 
  -3   7   4 8319.68 597.836   1 
   3  -7  -4 7777.03 399.191   2 
   3  -7  -3 151.869 65.9577   2 
  -3   7   3 71.0261 110.523   1 
  -3   7   2 21.7311 120.843   1 
   3  -7  -2 18.4880 40.0120   2 
  -3   7   1 18.2222 95.5157   1 
   3  -7  -1 55.8982 42.3914   4 
   3  -7   0 514.637 55.1954   4 
  -3   7   0 573.713 167.450   1 
   3  -7   1 17871.4 753.424   1 
  -3   7  -1 17089.2 784.299   1 
  -3   7  -2 1218.14 215.814   1 
  -3   7  -3 3151.85 341.158   1 
  -3   7  -4 24640.2 432.138   4 
  -3   7  -4 23612.0 926.786   1 
  -3   7  -4 24315.8 384.115   2 
  -3   7  -5 23263.7 520.401   4 
  -3   7  -5 22967.7 929.630   1 
  -3   7  -5 23059.9 484.151   2 
  -3   7  -6 17784.1 513.640   4 
  -3   7  -6 17196.9 821.660   1 
  -3   7  -6 17439.3 496.504   2 
  -3   7  -7-13.8249 66.5705   4 
  -3   7  -7-31.1998 66.8981   2 
  -3   7  -7-76.4305 132.894   1 
  -3   7  -8 288.430 80.6758   4 
  -3   7  -8 146.903 84.9215   2 
  -3   7  -8 284.900 155.409   1 
  -3   7  -9 5741.50 528.781   1 
  -3   7  -9 5709.76 387.850   2 
  -3   7 -10 1876.29 244.324   2 
  -3   7 -10 1994.96 331.598   1 
  -3   7 -11 759.979 186.401   2 
  -3   7 -11 747.757 211.190   1 
  -3   7 -12 93.7666 104.662   2 
  -3   7 -12 72.4086 83.1350   1 
  -3   7 -13 186.825 117.620   2 
  -3   7 -13 95.9295 126.100   1 
   3  -6 -13 690.637 253.184   2 
   3  -6 -12 616.840 226.615   2 
   3  -6 -11 1200.86 280.220   2 
   3  -6 -10 570.239 200.289   2 
   3  -6  -9 7144.66 547.189   2 
   3  -6  -8 17156.8 781.153   2 
  -3   6   7 2707.40 346.439   1 
   3  -6  -7 2405.75 285.742   2 
   3  -6  -6 1432.38 211.825   2 
  -3   6   6 1343.02 257.429   1 
  -3   6   6 1379.99 184.733   2 
  -3   6   5 46.8505 59.9354   2 
  -3   6   5 9.19187 102.034   1 
   3  -6  -4 926.671 145.073   2 
  -3   6   4 954.605 126.345   2 
  -3   6   4 898.522 195.166   1 
  -3   6   3 2495.65 178.571   2 
   3  -6  -3 2697.90 311.908   1 
   3  -6  -3 2730.87 215.661   2 
  -3   6   2 10093.2 303.005   2 
   3  -6  -2 10487.9 582.310   1 
   3  -6  -2 10586.8 364.932   2 
  -3   6   1 422.617 54.4125   2 
   3  -6  -1 552.280 132.186   1 
   3  -6  -1 492.993 84.8048   4 
  -3   6   0 2893.19 92.1770   2 
   3  -6   0 3227.22 305.582   1 
   3  -6   0 3066.68 159.057   4 
  -3   6   0 3452.14 338.895   1 
   3  -6   0 3220.28 149.897   3 
   3  -6   1 16006.4 290.868   4 
   3  -6   1 17246.5 695.466   1 
  -3   6  -1 15968.8 708.888   1 
   3  -6   2 27166.1 356.019   4 
   3  -6   2 26914.6 849.601   1 
  -3   6  -2 27504.4 916.265   1 
  -3   6  -3 43927.6 503.485   2 
  -3   6  -3 42835.2 615.537   4 
  -3   6  -3 44026.2 1162.51   1 
   3  -6   3 44789.6 532.313   4 
   3  -6   3 43801.7 1062.59   1 
  -3   6  -4 21487.7 444.386   2 
  -3   6  -4 21139.8 810.758   1 
  -3   6  -4 21681.8 501.605   4 
  -3   6  -5 5789.81 274.123   2 
  -3   6  -5 5440.09 283.655   4 
  -3   6  -5 5933.18 448.794   1 
  -3   6  -6 2741.79 215.517   2 
  -3   6  -6 2570.08 212.665   4 
  -3   6  -6 2872.07 321.550   1 
  -3   6  -7 50.2245 59.7630   4 
  -3   6  -7 200.880 79.8557   2 
  -3   6  -7 151.726 63.8397   3 
  -3   6  -7 83.6028 98.7961   1 
  -3   6  -8 2315.77 237.052   2 
  -3   6  -8 2554.09 251.508   4 
  -3   6  -8 2213.00 308.304   1 
  -3   6  -8 2837.39 239.598   3 
  -3   6  -9 5293.28 382.948   2 
  -3   6  -9 5786.96 398.381   4 
  -3   6  -9 6068.81 505.486   1 
  -3   6  -9 5800.01 375.183   3 
  -3   6 -10-50.7057 81.7515   2 
  -3   6 -10 34.5682 76.7637   3 
  -3   6 -10 104.036 116.352   1 
  -3   6 -11 278.575 136.557   1 
  -3   6 -11 414.479 133.932   3 
  -3   6 -12-83.8171 101.835   1 
  -3   6 -12 154.254 111.045   3 
  -3   6 -12 153.387 115.148   2 
  -3   6 -13 344.191 162.901   2 
  -3   6 -13 438.899 175.945   1 
  -3   6 -14-169.552 133.365   2 
  -3   6 -14-283.803 173.781   1 
   3  -5 -13 375.019 193.987   2 
   3  -5 -12 387.474 184.038   2 
   3  -5 -11-9.51047 126.003   2 
   3  -5 -10-6.79778 122.479   2 
   3  -5  -9 641.814 200.285   2 
   3  -5  -8 6100.12 468.969   2 
  -3   5   7 5516.59 374.929   2 
   3  -5  -7 6006.62 434.114   2 
  -3   5   6 3926.30 297.255   2 
  -3   5   6 4278.38 402.613   1 
   3  -5  -6 3881.20 327.633   2 
  -3   5   5 1825.10 193.668   2 
  -3   5   5 2089.30 280.483   1 
   3  -5  -4 18642.3 614.746   2 
  -3   5   4 17601.9 527.099   2 
  -3   5   3 16515.8 460.706   2 
   3  -5  -3 17882.6 740.179   1 
   3  -5  -3 17041.5 533.718   2 
   3  -5  -2 206.615 63.9416   2 
  -3   5   2 215.668 56.6159   2 
   3  -5  -2 216.570 91.7557   1 
  -3   5   1 5972.84 212.871   2 
   3  -5  -1 6449.38 253.116   3 
   3  -5  -1 6664.10 427.488   1 
   3  -5  -1 6123.20 276.305   4 
  -3   5   0 95620.2 1593.07   1 
   3  -5   0 93242.9 1518.04   1 
   3  -5   0 94785.4 967.483   4 
   3  -5   0 94512.6 759.063   3 
  -3   5   0 93171.9 750.958   2 
   3  -5   1 42575.8 588.444   4 
   3  -5   1 42515.8 1006.82   1 
  -3   5  -1 42328.4 524.586   2 
  -3   5  -1 40165.3 1028.47   1 
   3  -5   2 18927.4 381.497   4 
  -3   5  -2 18972.8 438.546   4 
   3  -5   2 18880.4 656.789   1 
  -3   5  -2 18205.2 689.757   1 
   3  -5   3 1336.14 109.681   4 
  -3   5  -3 1355.00 109.253   2 
   3  -5   3 1248.68 173.622   1 
  -3   5  -3 1387.56 199.315   1 
  -3   5  -3 1190.91 122.068   4 
   3  -5   4 9.39907 36.8430   4 
  -3   5  -4 91.8335 75.4425   1 
  -3   5  -4 1.64843 40.6433   4 
  -3   5  -4-4.84844 34.6157   2 
  -3   5  -5 1492.53 155.903   2 
  -3   5  -5 1373.60 153.657   4 
  -3   5  -5 1660.98 117.695   3 
  -3   5  -5 1471.28 214.627   1 
  -3   5  -6 125.710 108.116   1 
  -3   5  -6 87.3986 64.9309   4 
  -3   5  -6 54.5552 64.7601   2 
  -3   5  -6 94.9833 56.7026   3 
  -3   5  -7-34.1809 52.3859   4 
  -3   5  -7-20.7827 72.8657   2 
  -3   5  -7-59.3730 96.5549   1 
  -3   5  -7-6.48739 51.2308   3 
  -3   5  -8 14295.7 597.633   2 
  -3   5  -8 14515.4 604.540   4 
  -3   5  -8 13746.1 689.196   1 
  -3   5  -8 14458.9 546.823   3 
  -3   5  -9 997.519 206.776   1 
  -3   5  -9 1449.57 219.905   2 
  -3   5  -9 1207.41 189.311   3 
  -3   5 -10 370.494 134.841   2 
  -3   5 -10 405.737 128.754   3 
  -3   5 -10 559.107 170.595   1 
  -3   5 -11 634.246 181.670   2 
  -3   5 -11 683.735 171.568   3 
  -3   5 -11 668.377 167.935   1 
  -3   5 -12 349.981 148.394   2 
  -3   5 -12 452.770 171.858   1 
  -3   5 -12 583.710 157.624   3 
  -3   5 -13 179.924 122.906   2 
  -3   5 -13-160.503 125.533   1 
  -3   5 -13 161.801 114.393   3 
  -3   5 -14 385.370 183.837   2 
  -3   5 -14-67.8121 108.158   1 
   3  -4 -13-121.425 123.092   2 
   3  -4 -13-29.0450 150.036   3 
   3  -4 -12 178.128 159.100   2 
   3  -4 -12-54.8386 141.516   3 
   3  -4 -11 1833.14 319.513   2 
   3  -4 -10 485.860 178.048   2 
   3  -4  -9 2199.07 304.475   2 
   3  -4  -8 10143.0 591.366   2 
  -3   4   7 41290.3 1006.28   2 
   3  -4  -7 40753.2 1102.76   2 
  -3   4   6 15565.6 582.449   2 
   3  -4  -6 14763.4 624.495   2 
   3  -4  -5 53825.9 1321.33   1 
  -3   4   5 53747.3 997.514   2 
  -3   4   4 57210.6 955.410   2 
   3  -4  -4 57223.2 1308.56   1 
   3  -4  -4 56134.6 1067.88   2 
  -3   4   3 75975.0 994.105   2 
   3  -4  -3 77116.3 1448.64   1 
   3  -4  -3 75991.7 1137.06   2 
   3  -4  -3 74390.0 1115.42   3 
   3  -4  -2 56534.9 1180.61   1 
   3  -4  -2 54932.6 849.337   3 
   3  -4  -2 54908.3 888.893   2 
  -3   4   2 54482.9 766.811   2 
   3  -4  -1 103663. 1005.65   3 
  -3   4   1 100578. 1538.90   1 
   3  -4  -1 102914. 1173.03   4 
   3  -4  -1 102058. 1543.85   1 
  -3   4   1 104995. 1006.31   2 
   3  -4   0 80483.3 1311.05   1 
   3  -4   0 81396.4 969.694   4 
  -3   4   0 83203.0 878.645   2 
  -3   4   0 81760.3 1356.68   1 
  -3   4  -1 33874.7 861.325   1 
   3  -4   1 32409.7 581.663   4 
  -3   4  -1 32289.8 609.351   4 
   3  -4   1 32917.2 806.725   1 
   3  -4   2 11228.9 463.257   1 
  -3   4  -2 10756.1 483.518   1 
  -3   4  -2 11243.3 375.904   4 
   3  -4   2 11319.5 337.237   4 
   3  -4   3 363.620 65.3543   4 
  -3   4  -3 536.246 114.938   1 
  -3   4  -3 584.559 93.1815   4 
   3  -4   4 4479.51 237.004   4 
  -3   4  -4 4033.36 253.578   4 
  -3   4  -4 4290.41 314.244   1 
   3  -4   5 1467.48 152.118   4 
  -3   4  -5 1463.51 197.020   1 
  -3   4  -5 1320.96 150.786   2 
  -3   4  -5 1294.92 159.255   4 
  -3   4  -6 4194.21 286.812   2 
  -3   4  -6 4759.07 316.208   4 
  -3   4  -6 4389.56 337.096   1 
  -3   4  -7 1180.68 178.084   4 
  -3   4  -7 1162.47 182.080   1 
  -3   4  -7 991.753 162.993   2 
  -3   4  -8 444.333 142.998   1 
  -3   4  -8 436.581 132.893   4 
  -3   4  -8 403.210 131.387   2 
  -3   4  -9 5397.95 412.470   2 
  -3   4  -9 5105.69 421.937   1 
  -3   4 -10 3506.27 356.717   2 
  -3   4 -10 2987.69 338.162   1 
  -3   4 -11 1231.19 231.043   2 
  -3   4 -12 100.118 96.8693   2 
  -3   4 -13 872.848 247.511   2 
  -3   4 -13 765.165 211.041   3 
  -3   4 -14-74.1206 122.505   2 
  -3   4 -14 176.666 120.599   3 
   3  -3 -14-88.3322 144.499   2 
   3  -3 -13 82.5606 115.172   2 
   3  -3 -13 269.867 188.587   3 
   3  -3 -12 572.274 220.432   2 
   3  -3 -12 728.439 235.804   3 
   3  -3 -11 122.330 140.886   2 
   3  -3 -11 329.039 167.170   3 
   3  -3 -10 263.756 143.764   2 
   3  -3 -10 803.812 219.392   3 
   3  -3  -9 3316.36 380.652   3 
   3  -3  -9 3659.41 381.739   2 
   3  -3  -8 9313.63 591.133   3 
   3  -3  -8 9832.95 582.630   2 
  -3   3   7 3361.22 289.243   2 
   3  -3  -7 2843.71 310.990   3 
   3  -3  -7 2953.28 303.773   2 
  -3   3   6 1089.32 159.059   2 
   3  -3  -6 1260.16 195.694   2 
   3  -3  -6 1133.98 180.983   3 
   3  -3  -6 920.004 174.356   1 
  -3   3   5 41512.3 885.600   2 
   3  -3  -5 42518.6 1113.31   1 
  -3   3   4 2330.01 195.992   2 
   3  -3  -4 2264.03 216.979   3 
   3  -3  -4 2322.20 226.474   2 
   3  -3  -4 2126.15 238.187   1 
   3  -3  -3 3014.93 271.034   1 
   3  -3  -3 2700.16 217.920   3 
   3  -3  -3 2814.97 228.876   2 
  -3   3   3 2895.36 204.705   2 
   3  -3  -2 10670.6 477.725   1 
   3  -3  -2 10555.1 378.553   3 
   3  -3  -2 10304.2 401.918   2 
  -3   3   2 10180.6 463.741   1 
  -3   3   2 10177.9 360.583   2 
   3  -3  -1 26991.8 722.932   1 
  -3   3   1 27525.2 577.583   2 
   3  -3  -1 26635.9 616.457   4 
  -3   3   1 27665.9 729.433   1 
  -3   3   0 65762.8 1098.02   1 
   3  -3   0 66960.1 1080.41   1 
   3  -3   0 67609.3 939.933   4 
  -3   3   0 67637.1 675.294   3 
  -3   3   0 65362.6 881.384   2 
  -3   3  -1 1289.73 160.182   1 
  -3   3  -1 1467.92 145.536   4 
   3  -3   1 1387.84 132.423   4 
   3  -3   1 1469.53 159.008   1 
  -3   3  -2 6961.84 346.229   1 
   3  -3   2 7058.31 292.719   4 
   3  -3   2 6699.67 316.835   1 
  -3   3  -2 6823.91 316.463   4 
  -3   3  -3 196.236 69.5462   1 
   3  -3   3 261.979 73.2314   4 
  -3   3  -3 196.126 61.4667   4 
   3  -3   4 20716.7 537.889   4 
  -3   3  -4 20021.6 606.431   1 
  -3   3  -4 21042.1 607.659   4 
  -3   3  -5 3949.22 280.156   1 
  -3   3  -5 3961.74 281.568   4 
  -3   3  -6 4954.38 322.706   2 
  -3   3  -6 5030.89 332.139   1 
  -3   3  -6 5450.58 349.471   4 
  -3   3  -7 2324.70 241.950   2 
  -3   3  -7 2492.83 254.635   4 
  -3   3  -7 2301.91 240.778   1 
  -3   3  -8 4601.20 358.750   2 
  -3   3  -9 9531.37 557.689   2 
  -3   3 -10 1546.73 259.281   2 
  -3   3 -11 1364.20 250.073   2 
  -3   3 -12-163.109 131.879   2 
  -3   3 -13-527.689 196.850   2 
   3  -2 -14 212.395 177.183   2 
   3  -2 -14 544.972 227.516   3 
   3  -2 -13 200.851 165.034   2 
   3  -2 -13-402.657 199.690   3 
   3  -2 -12 365.376 165.866   2 
   3  -2 -12 413.680 193.159   3 
   3  -2 -11-29.0229 135.919   2 
   3  -2 -11-90.6866 159.591   3 
   3  -2 -10 120.284 123.777   2 
   3  -2 -10 295.618 166.856   3 
   3  -2  -9 5161.01 460.796   3 
   3  -2  -9 5432.34 463.365   2 
   3  -2  -8 6834.29 490.945   3 
   3  -2  -8 6169.75 469.665   2 
   3  -2  -7 26.3532 90.2791   2 
  -3   2   7-85.2095 118.317   2 
   3  -2  -7-26.9949 94.5776   1 
   3  -2  -7 8.66094 92.7905   3 
  -3   2   6 23134.0 703.058   2 
   3  -2  -6 23643.6 796.888   3 
   3  -2  -6 23287.5 830.498   1 
   3  -2  -6 22874.7 788.350   2 
  -3   2   5 1376.68 167.366   2 
   3  -2  -5 1312.57 190.576   1 
   3  -2  -4 1939.37 203.556   3 
   3  -2  -4 1908.92 213.531   2 
   3  -2  -4 2217.65 227.600   1 
  -3   2   4 1776.75 179.055   2 
   3  -2  -3 1157.82 149.356   3 
  -3   2   3 1292.41 164.058   1 
   3  -2  -3 1343.28 168.865   2 
  -3   2   3 1308.31 150.490   2 
   3  -2  -3 1639.60 183.291   1 
   3  -2  -2 36611.8 817.421   1 
   3  -2  -2 38084.4 803.287   4 
  -3   2   2 37359.8 685.989   3 
   3  -2  -2 37316.5 783.658   2 
  -3   2   2 37729.0 799.266   1 
  -3   2   2 38856.3 753.515   2 
   3  -2  -1 5939.43 305.290   4 
   3  -2  -1 5916.82 305.663   1 
  -3   2   1 6223.50 266.280   3 
  -3   2   1 6809.39 312.949   2 
  -3   2   1 5654.79 300.755   1 
  -3   2   0 20882.8 545.861   1 
   3  -2   0 20514.3 533.405   1 
   3  -2   0 20013.5 541.067   4 
  -3   2   0 19757.0 535.656   4 
   3  -2   1 2925.64 187.883   1 
  -3   2  -1 2840.90 194.170   1 
  -3   2  -1 2962.24 214.990   4 
   3  -2   1 2851.37 201.562   4 
   3  -2   2 10792.6 387.549   4 
  -3   2  -2 9874.54 359.175   1 
  -3   2  -2 10747.9 418.675   4 
   3  -2   2 10602.6 342.706   1 
   3  -2   3 31319.8 673.037   4 
  -3   2  -3 30773.4 732.317   4 
  -3   2  -3 29508.4 626.369   1 
  -3   2  -4 7953.16 393.181   4 
  -3   2  -4 7838.04 340.018   1 
  -3   2  -5 276.220 85.8362   4 
  -3   2  -5 342.729 89.8546   1 
   3  -2   6 43.5033 63.4165   4 
  -3   2  -6 47.8360 59.3042   4 
  -3   2  -6 56.2899 52.3302   1 
  -3   2  -6 20.8139 73.4089   2 
   3  -2   7 247.600 90.5758   4 
  -3   2  -7 122.938 87.9377   4 
  -3   2  -7 29.8822 97.7647   2 
  -3   2  -8 6117.85 426.499   2 
  -3   2  -9 947.098 195.298   2 
  -3   2 -10-2.90911 127.025   2 
  -3   2 -11 669.647 214.304   2 
  -3   2 -12 219.128 128.535   2 
  -3   2 -13 260.356 146.622   2 
   3  -1 -14 220.270 164.990   2 
   3  -1 -14 416.583 225.539   3 
   3  -1 -13 684.674 248.546   2 
   3  -1 -13 295.702 173.758   3 
   3  -1 -12 268.306 174.431   2 
   3  -1 -12 323.567 193.534   3 
   3  -1 -11 3.73515 127.245   2 
   3  -1 -11 139.310 182.129   3 
   3  -1 -10 6135.76 529.190   3 
   3  -1 -10 6547.28 535.379   2 
   3  -1  -9 799.032 216.254   2 
   3  -1  -9 683.057 210.404   3 
   3  -1  -8 3874.46 378.631   3 
   3  -1  -8 4003.57 382.341   2 
  -3   1   7 10158.3 495.784   2 
   3  -1  -7 9410.71 541.473   1 
   3  -1  -7 9115.47 538.755   2 
  -3   1   6 6832.94 388.054   2 
   3  -1  -6 7048.07 443.121   1 
   3  -1  -5 29862.7 843.642   1 
  -3   1   5 30021.0 766.706   2 
   3  -1  -4 29923.2 791.034   1 
  -3   1   4 30051.6 742.057   2 
  -3   1   3 9901.61 400.409   3 
   3  -1  -3 10529.3 430.543   1 
  -3   1   3 10264.1 424.502   2 
  -3   1   2 8726.31 357.105   3 
  -3   1   2 8601.01 345.180   1 
  -3   1   2 9125.28 393.048   2 
   3  -1  -2 8988.83 366.473   1 
   3  -1  -1 4624.69 243.401   1 
  -3   1   1 4499.85 271.121   2 
  -3   1   1 4846.57 236.688   1 
   3  -1   0 129875. 1157.84   1 
  -3   1   0 127880. 1438.80   4 
  -3   1   0 131208. 1152.14   1 
  -3   1  -1 7579.45 262.718   1 
   3  -1   1 6554.62 233.863   1 
  -3   1  -1 6938.61 343.556   4 
  -3   1  -2 30787.6 742.000   4 
  -3   1  -2 31805.5 530.299   1 
  -3   1  -3 14047.0 521.215   4 
  -3   1  -3 15041.4 376.915   1 
  -3   1  -4 109.338 63.3987   4 
  -3   1  -4 241.262 62.5956   1 
  -3   1  -5 2595.05 248.657   4 
   3  -1   6 10138.3 478.464   4 
  -3   1  -6 10937.7 526.016   4 
   3  -1   7 1440.98 206.961   4 
  -3   1  -7 1353.41 198.248   2 
  -3   1  -8 25.5511 133.061   2 
  -3   1  -9 19616.2 819.740   2 
  -3   1 -10 6604.82 514.172   2 
  -3   1 -11 326.214 162.371   2 
  -3   1 -12 64.2514 131.539   2 
  -3   1 -13 103.238 150.392   2 
   3   0 -14 440.954 206.358   3 
   3   0 -14 822.248 266.240   2 
   3   0 -13 2906.71 439.284   2 
   3   0 -13 1998.92 366.011   3 
   3   0 -12 2224.38 372.631   3 
   3   0 -12 3016.39 416.052   2 
   3   0 -11 3320.13 421.066   3 
   3   0 -11 3806.43 438.812   2 
   3   0 -10 9981.33 680.524   3 
   3   0 -10 9936.02 670.099   2 
   3   0  -9 2398.98 334.638   3 
   3   0  -9 2626.62 337.429   2 
   3   0  -8 2233.11 293.952   3 
   3   0  -8 2336.95 311.003   2 
  -3   0   7 1716.00 218.862   2 
  -3   0   6 1550.62 192.086   2 
  -3   0   5 207.652 83.6199   3 
  -3   0   5 313.832 88.6005   2 
  -3   0   4 33108.5 799.285   3 
   3   0  -4 31567.2 772.867   1 
  -3   0   4 31168.5 791.286   2 
  -3   0   3 54210.5 991.306   3 
   3   0  -3 52383.2 902.929   1 
  -3   0   3 51139.4 989.221   2 
  -3   0   2 20.0495 53.0895   2 
   3   0  -2 5.01274 45.1969   1 
  -3   0   1 305657. 2307.60   4 
   3   0  -1 295446. 1709.54   1 
   3   0   0 7340.15 227.686   1 
  -3   0   0 7158.00 363.249   4 
  -3   0  -1 36895.3 831.424   4 
   3   0   1 36130.1 388.413   1 
  -3   0  -1 37436.6 399.048   1 
  -3   0  -2 2068.50 94.0120   1 
  -3   0  -2 2064.48 208.166   4 
  -3   0  -3 119736. 1577.69   4 
  -3   0  -3 115175. 810.566   1 
  -3   0  -4 38651.8 546.646   1 
  -3   0  -4 38363.2 929.787   4 
  -3   0  -5-59.8423 87.2794   4 
  -3   0  -6 22703.2 786.273   4 
   3   0   6 21819.9 710.946   4 
   3   0   7 38050.4 1014.30   4 
  -3   0  -7 38792.2 1039.97   2 
   3   0   8 15334.2 682.188   4 
  -3   0  -8 15674.6 709.295   2 
  -3   0  -9 8677.57 567.582   2 
  -3   0 -10 5826.58 502.399   2 
  -3   0 -11 2509.73 355.257   2 
  -3   0 -12 1078.49 261.097   2 
  -3   0 -13-265.985 167.608   2 
   3   1 -14-69.8277 158.586   2 
   3   1 -14 174.307 171.149   3 
   3   1 -13 22.2431 163.592   3 
   3   1 -13 148.669 177.422   2 
   3   1 -12 85.6256 151.857   2 
   3   1 -12-18.6732 131.284   3 
   3   1 -11 10843.4 746.094   3 
   3   1 -11 11039.6 749.003   2 
   3   1 -10 1584.39 320.082   2 
   3   1 -10 1399.17 303.527   3 
   3   1  -9 1309.33 236.968   2 
   3   1  -9 1547.57 271.587   3 
   3   1  -8 3812.07 388.982   3 
   3   1  -8 3525.93 368.073   2 
  -3  -1   7 14130.1 598.481   2 
  -3  -1   6 11854.9 548.231   3 
  -3  -1   6 11648.4 522.620   2 
  -3  -1   5 308.864 95.7914   2 
  -3  -1   5 145.209 73.4899   3 
  -3  -1   4 27103.1 758.435   3 
  -3  -1   4 26221.4 750.439   2 
  -3  -1   3 46737.7 977.256   2 
  -3  -1   2 161381. 1801.69   2 
  -3  -1   1 777.619 133.937   4 
   3   1  -1 839.839 84.8481   1 
  -3  -1   0 52948.3 1030.29   4 
   3   1   0 56727.7 520.601   1 
  -3  -1  -1 6776.78 374.331   4 
  -3  -1  -2 91076.3 1398.20   4 
  -3  -1  -3 17140.2 623.617   4 
  -3  -1  -4 3037.99 282.366   4 
  -3  -1  -4 2880.15 138.923   1 
  -3  -1  -5-14.3323 127.549   4 
  -3  -1  -5 123.939 46.9520   1 
   3   1   6 31315.9 878.005   4 
  -3  -1  -6 32794.9 666.595   1 
  -3  -1  -7 411.960 98.4295   1 
   3   1   7 202.164 117.910   4 
  -3  -1  -8 1064.10 226.635   2 
  -3  -1  -8 1487.59 203.993   1 
  -3  -1  -9 4408.76 415.559   2 
  -3  -1  -9 4279.84 332.243   1 
  -3  -1 -10 3325.83 388.922   2 
  -3  -1 -11 384.025 188.865   2 
  -3  -1 -12 163.602 166.308   2 
   3   2 -14 122.980 145.715   3 
   3   2 -14 96.0082 155.561   2 
   3   2 -13 14.3740 158.163   2 
   3   2 -13 86.0207 130.599   3 
   3   2 -12 213.016 164.411   2 
   3   2 -12 194.517 171.854   3 
   3   2 -11 511.659 239.626   3 
   3   2 -11 39.8112 143.256   2 
   3   2 -10 34835.1 1270.70   3 
   3   2 -10 33331.4 1236.14   2 
   3   2  -9 911.995 223.420   2 
   3   2  -8 2683.04 325.453   2 
  -3  -2   7 834.870 163.329   2 
  -3  -2   7 624.934 144.521   3 
   3   2  -7 667.244 178.510   2 
  -3  -2   6 1057.21 169.131   2 
  -3  -2   6 1049.16 186.521   3 
  -3  -2   5 15661.4 628.074   3 
  -3  -2   5 15362.2 613.035   2 
  -3  -2   4 13576.0 570.471   3 
  -3  -2   4 14338.4 580.611   2 
  -3  -2   3 961.272 158.709   2 
  -3  -2   2 19587.6 658.435   2 
  -3  -2   1 3013.78 257.206   4 
  -3  -2   0 6372.11 375.194   4 
   3   2   0 6386.65 172.012   1 
  -3  -2  -1 7293.69 405.351   4 
  -3  -2  -2 16545.1 623.228   4 
  -3  -2  -3 2989.92 280.398   4 
  -3  -2  -4 9952.86 515.792   4 
  -3  -2  -4 8979.37 241.121   1 
  -3  -2  -5 34329.4 597.537   1 
  -3  -2  -5 35518.5 1011.96   4 
   3   2   6 1857.62 228.777   4 
  -3  -2  -6 1756.92 163.559   1 
   3   2   7 1654.12 249.254   4 
  -3  -2  -7 1472.32 168.883   1 
   3   2   8 5726.02 449.517   4 
  -3  -2  -8 5318.73 442.392   2 
  -3  -2  -8 5741.46 356.983   1 
  -3  -2  -9-18.2323 111.519   2 
  -3  -2  -9 169.307 92.4044   1 
  -3  -2 -10 38.9765 111.253   2 
  -3  -2 -11 839.110 255.218   2 
  -3  -2 -12 1978.12 348.496   2 
   3   3 -14-75.0425 121.705   2 
   3   3 -13-208.453 162.457   2 
   3   3 -12-40.5480 134.130   2 
   3   3 -11 9298.24 705.853   2 
   3   3 -10 3069.60 392.284   2 
   3   3  -9 6400.57 527.042   2 
   3   3  -8 93.5246 127.305   2 
   3   3  -7 16617.6 768.299   2 
  -3  -3   7 16213.8 664.646   2 
  -3  -3   6 31279.0 942.782   3 
   3   3  -6 30517.7 991.239   2 
  -3  -3   6 30364.8 894.640   2 
   3   3  -5 8754.44 492.953   4 
  -3  -3   5 8731.16 490.906   3 
   3   3  -5 8474.18 506.300   2 
  -3  -3   5 8590.58 474.817   2 
   3   3  -4 30654.7 889.314   4 
  -3  -3   4 31873.7 890.119   2 
   3   3  -3 25687.7 790.893   4 
  -3  -3   3 24713.7 777.760   2 
   3   3  -2 124.445 95.3283   4 
  -3  -3   2 165.231 82.9679   4 
  -3  -3   2 98.6445 68.2844   2 
   3   3  -1 41010.4 951.527   4 
  -3  -3   1 40442.4 964.429   4 
  -3  -3   0 2218.15 233.715   4 
   3   3   0 2064.96 129.345   1 
   3   3   0 1808.31 209.724   4 
   3   3   1 6039.75 184.774   1 
  -3  -3  -1 5908.04 385.417   4 
   3   3   1 5668.14 353.035   4 
   3   3   2 2108.62 226.501   4 
  -3  -3  -2 2041.73 234.134   4 
   3   3   3 507.331 131.453   4 
  -3  -3  -3 715.346 158.742   4 
  -3  -3  -3 497.407 48.9549   1 
  -3  -3  -4 4888.86 195.300   1 
  -3  -3  -4 5372.81 395.197   4 
   3   3   4 5199.08 364.290   4 
   3   3   5 6838.31 425.380   4 
  -3  -3  -5 6503.01 271.670   1 
  -3  -3  -6 4517.76 264.396   1 
   3   3   6 4336.22 360.049   4 
  -3  -3  -7 4739.35 301.488   1 
   3   3   7 4052.83 380.972   4 
  -3  -3  -8 1138.36 172.919   1 
   3   3   8 998.538 219.930   4 
  -3  -3  -8 1159.49 236.332   2 
  -3  -3  -9-115.692 136.016   2 
  -3  -3 -10 2605.93 372.177   2 
  -3  -3 -11 386.114 174.026   2 
   3   4 -14-154.342 149.489   2 
   3   4 -13-54.9030 163.402   2 
   3   4 -12-93.7804 171.169   2 
   3   4 -11 101.046 155.617   2 
   3   4 -10 3122.01 397.759   2 
   3   4  -9 3160.28 380.063   2 
   3   4  -8 8032.44 573.098   2 
   3   4  -7 6034.03 483.614   2 
   3   4  -6 8328.74 512.403   4 
  -3  -4   6 7262.59 479.682   3 
   3   4  -6 7381.49 507.478   2 
  -3  -4   6 7774.81 466.047   2 
  -3  -4   5 725.605 151.781   2 
   3   4  -5 884.397 171.041   4 
  -3  -4   5 697.504 153.321   3 
   3   4  -4 20602.7 745.553   4 
  -3  -4   4 21311.3 757.400   2 
   3   4  -3 68386.2 1321.60   4 
  -3  -4   3 71476.4 1366.66   2 
   3   4  -2 57561.8 1180.92   4 
  -3  -4   2 56230.2 1162.28   4 
   3   4  -1 402.489 84.0321   1 
   3   4  -1 173.257 102.488   4 
  -3  -4   1 229.384 88.4649   4 
   3   4   0 39920.7 950.684   4 
  -3  -4   0 40078.7 1013.06   4 
   3   4   0 39031.3 670.902   1 
   3   4   1 28494.4 535.128   1 
   3   4   1 27670.1 797.315   4 
  -3  -4  -1 28338.6 870.712   4 
   3   4   2 35018.7 894.587   4 
  -3  -4  -2 34569.9 978.443   4 
   3   4   2 32498.6 529.295   1 
   3   4   3 335.248 131.245   4 
  -3  -4  -3 341.609 110.928   4 
  -3  -4  -3 348.562 57.2962   1 
   3   4   4 71.7742 106.362   4 
  -3  -4  -4 60.6871 36.0045   1 
   3   4   5 1371.00 209.034   4 
  -3  -4  -5 1427.05 139.009   1 
  -3  -4  -6 1892.51 183.545   1 
   3   4   6 1693.52 248.276   4 
   3   4   7-205.827 125.494   4 
  -3  -4  -7-57.9563 58.6552   1 
   3   4   8 760.810 185.771   4 
  -3  -4  -8 1093.22 231.892   2 
  -3  -4  -9 479.445 184.056   2 
  -3  -4 -10 372.183 176.058   2 
  -3  -4 -11 990.137 282.780   2 
   3   5 -14-424.014 198.345   2 
   3   5 -13 1058.92 288.525   2 
   3   5 -12 317.109 174.686   2 
   3   5 -11 113.671 142.237   2 
   3   5 -10 1175.39 271.916   2 
   3   5  -9 3444.59 407.356   2 
   3   5  -8 3207.59 373.843   2 
   3   5  -7 668.751 169.318   4 
   3   5  -7 1044.12 219.356   2 
  -3  -5   6 124.863 87.7593   2 
   3   5  -6-16.5016 102.332   4 
   3   5  -5 1679.24 240.488   4 
  -3  -5   5 1725.11 229.485   2 
  -3  -5   4 424.290 122.618   2 
   3   5  -4 582.103 146.137   4 
  -3  -5   3 1167.89 193.355   2 
   3   5  -3 743.773 151.675   4 
   3   5  -2 8579.89 468.158   4 
  -3  -5   2 8546.52 472.222   4 
   3   5  -2 8616.96 397.136   1 
   3   5  -1 10474.0 506.724   4 
   3   5  -1 10274.5 418.399   1 
  -3  -5   1 9997.37 516.232   4 
   3   5   0 6503.81 401.992   4 
   3   5   0 6094.10 311.179   1 
  -3  -5   0 6653.90 435.098   4 
   3   5   1 362.384 86.8390   1 
   3   5   1 633.114 145.934   4 
  -3  -5  -1 307.917 103.798   4 
   3   5   2 4442.18 343.476   4 
  -3  -5  -2 5080.04 396.884   4 
   3   5   2 4783.94 254.418   1 
   3   5   3 3195.44 300.114   4 
  -3  -5  -3 2702.79 175.205   1 
   3   5   3 2928.03 194.097   1 
   3   5   4 100.358 103.262   4 
  -3  -5  -4 248.363 69.2758   1 
   3   5   5 118.706 102.984   4 
  -3  -5  -5 283.206 71.4174   1 
  -3  -5  -6 552.229 112.397   1 
   3   5   6 424.797 163.112   4 
   3   5   7-40.8436 116.893   4 
   3   5   8 1409.43 253.548   4 
  -3  -5  -8 1356.15 261.072   2 
  -3  -5  -9 1015.13 238.723   2 
  -3  -5 -10 36.5232 127.880   2 
   3   6 -14 770.927 271.771   2 
   3   6 -13-134.106 147.700   2 
   3   6 -12 134.497 164.194   2 
   3   6 -11 1327.47 279.575   2 
   3   6 -10 1295.99 270.592   2 
   3   6  -9 3525.90 409.609   2 
   3   6  -8-144.640 130.081   4 
   3   6  -7 692.569 176.131   4 
   3   6  -6 381.306 139.843   4 
   3   6  -5 2118.54 265.208   4 
  -3  -6   5 2073.92 255.712   2 
  -3  -6   4 1783.49 237.401   2 
   3   6  -4 1277.61 207.954   4 
   3   6  -4 1488.75 210.588   1 
  -3  -6   3 1907.02 248.523   2 
   3   6  -3 1645.46 224.999   4 
   3   6  -2 2.70869 89.9056   4 
  -3  -6   2-50.9898 86.8187   4 
   3   6  -1 1440.76 179.102   1 
   3   6  -1 1367.40 201.031   4 
  -3  -6   1 1337.56 207.030   4 
   3   6   0 11062.8 540.391   4 
   3   6   0 11624.0 487.471   1 
  -3  -6   0 12337.2 612.260   4 
   3   6   1 15682.3 550.924   1 
   3   6   1 16172.6 648.307   4 
  -3  -6  -1 16042.4 709.880   4 
   3   6   2 17699.5 684.403   4 
   3   6   2 16369.1 542.966   1 
  -3  -6  -3 17668.9 501.974   1 
   3   6   3 18002.5 707.554   4 
   3   6   3 17694.1 553.979   1 
  -3  -6  -4 739.417 116.655   1 
   3   6   4 677.607 178.519   4 
   3   6   4 694.426 124.022   1 
   3   6   5 7341.08 486.834   4 
  -3  -6  -5 6194.70 335.766   1 
   3   6   6 483.617 161.973   4 
   3   6   7 804.815 196.998   4 
  -3  -6  -8 2068.93 316.033   2 
  -3  -6  -9 313.957 170.141   2 
  -3  -6 -10 2.73543 137.511   2 
   3   7 -14-304.028 188.243   2 
   3   7 -13 203.144 159.889   2 
   3   7 -12 344.216 170.423   2 
   3   7 -11 19.9148 127.193   2 
   3   7 -10 570.721 185.876   4 
   3   7 -10 662.923 218.960   2 
   3   7  -9 191.570 142.022   4 
   3   7  -8 746.850 198.918   4 
   3   7  -7 218.960 132.502   4 
   3   7  -6 892.448 211.054   1 
   3   7  -6 648.058 167.939   4 
   3   7  -5 569.266 166.757   4 
   3   7  -5 700.531 180.842   1 
  -3  -7   4 575.765 142.152   2 
   3   7  -4 631.848 157.339   4 
   3   7  -4 669.027 172.139   1 
   3   7  -3-15.8799 88.3108   1 
  -3  -7   3-3.41004 75.5684   2 
   3   7  -3-55.6163 88.6763   4 
   3   7  -2 173.391 105.950   4 
  -3  -7   2 122.582 75.5323   4 
  -3  -7   2 113.471 84.7665   2 
  -3  -7   1 7632.95 486.995   4 
   3   7  -1 8837.63 492.513   4 
  -3  -7   0 16867.2 742.267   4 
   3   7   0 17402.0 686.153   4 
   3   7   1 5704.49 393.529   4 
   3   7   2 2505.40 273.559   4 
   3   7   2 1597.95 203.079   1 
  -3  -7  -3 23.1110 64.2227   1 
   3   7   3 147.929 98.1380   4 
   3   7   3 76.6553 62.4824   1 
   3   7   4 3396.15 335.742   4 
   3   7   5 238.859 144.409   4 
   3   7   6 588.809 171.687   4 
   3   7   7 1609.18 267.322   4 
  -3  -7  -7 1933.75 308.867   2 
  -3  -7  -8 212.451 151.540   2 
  -3  -7  -9 38.0253 131.535   2 
   3   8 -13 158.537 149.473   2 
   3   8 -13-8.68960 103.492   4 
   3   8 -12 295.273 86.8943   4 
   3   8 -11 766.839 245.441   4 
   3   8 -10 343.685 143.412   4 
   3   8  -9 83.7358 121.892   4 
   3   8  -8 536.161 156.401   4 
   3   8  -8 369.363 150.314   1 
   3   8  -7 366.726 167.811   1 
   3   8  -7 83.7548 88.6484   4 
   3   8  -6 155.824 125.170   1 
   3   8  -6 124.455 103.765   4 
   3   8  -5 460.973 149.156   4 
   3   8  -5 636.549 187.079   1 
   3   8  -4 1732.11 265.384   1 
   3   8  -4 1688.23 232.116   4 
   3   8  -3 306.821 98.7116   4 
   3   8  -3 400.878 142.621   1 
   3   8  -2 142.425 105.424   1 
   3   8  -2-35.7543 112.281   4 
   3   8  -1 732.329 171.883   4 
  -3  -8   1 432.251 129.182   4 
   3   8  -1 742.509 172.372   1 
   3   8   0 406.520 115.687   4 
   3   8   0 206.362 109.665   1 
   3   8   1 626.202 161.447   4 
   3   8   2 3260.88 322.650   4 
   3   8   3 411.255 140.036   4 
   3   8   4 795.647 183.202   4 
   3   8   5-69.8221 102.279   4 
   3   8   6 381.798 131.018   4 
  -3  -8  -7 21.9060 129.562   2 
  -3  -8  -8-16.4126 104.064   2 
   3   9 -12 214.724 138.366   4 
   3   9 -11-8.19189 146.664   1 
   3   9 -11-280.749 150.073   4 
   3   9 -10 362.326 155.584   4 
   3   9 -10 617.633 255.074   1 
   3   9  -9 248.689 136.146   4 
   3   9  -9 388.594 202.690   1 
   3   9  -8 518.081 208.698   1 
   3   9  -8 275.351 131.402   4 
   3   9  -7 198.064 130.537   4 
   3   9  -7 155.576 127.451   1 
   3   9  -6 11.1240 133.242   1 
   3   9  -6-52.6178 83.3170   4 
   3   9  -5 1511.93 236.991   4 
   3   9  -5 1678.78 286.672   1 
   3   9  -4 254.470 104.100   4 
   3   9  -4 310.022 149.141   1 
   3   9  -3 2709.74 334.789   1 
   3   9  -3 2218.02 266.412   4 
   3   9  -2 2783.60 326.361   1 
   3   9  -2 2854.53 298.221   4 
   3   9  -1 742.466 160.878   4 
   3   9  -1 1223.32 229.291   1 
   3   9   0 122.236 104.096   4 
   3   9   0 27.8120 110.672   1 
   3   9   1 425.846 143.988   1 
   3   9   1 628.252 158.208   4 
   3   9   2 131.183 117.746   1 
   3   9   2 140.633 108.679   4 
   3   9   3 237.530 135.876   4 
   3   9   3 385.511 127.006   1 
   3   9   4-273.577 134.501   4 
   3   9   5-364.278 152.213   4 
   3   9   6 336.225 151.070   4 
  -3  -9  -6 136.010 126.864   2 
  -3  -9  -7 183.988 131.272   2 
   3  10 -10 350.662 202.688   1 
   3  10  -9 489.671 146.108   4 
   3  10  -9 784.825 255.735   1 
   3  10  -8 1329.04 304.760   1 
   3  10  -8 1169.68 232.045   4 
   3  10  -7 661.651 230.529   1 
   3  10  -7 422.578 141.676   4 
   3  10  -6 417.480 139.595   4 
   3  10  -6 577.920 190.380   1 
   3  10  -5 799.193 172.411   4 
   3  10  -5 1119.14 249.631   1 
   3  10  -4 16.9221 101.097   4 
   3  10  -4 179.359 125.719   1 
   3  10  -3 574.299 193.265   1 
   3  10  -3 400.535 128.922   4 
   3  10  -2 104.484 96.7182   4 
   3  10  -2 138.879 113.935   1 
   3  10  -1 156.261 101.709   4 
   3  10  -1 149.134 109.986   1 
   3  10   0 34.1428 101.052   1 
   3  10   0-64.9141 98.0497   4 
   3  10   1 14.7040 103.979   4 
   3  10   1-14.2372 98.4186   1 
   3  10   2 1364.19 224.698   4 
   3  10   2 1358.18 238.612   1 
   3  10   3 805.771 181.746   4 
   3  10   4 80.2756 107.257   4 
   3  10   5-343.971 149.967   4 
  -3 -10  -6-14.8134 113.218   2 
  -3 -10  -7 47.6761 138.008   2 
   3  11  -9 626.110 247.990   1 
   3  11  -8 367.292 195.329   1 
   3  11  -7-103.745 165.937   1 
   3  11  -6 64.5376 123.354   1 
   3  11  -5 492.203 186.740   1 
   3  11  -4 2.70846 110.263   1 
   3  11  -3 156.542 106.251   4 
   3  11  -3 179.853 119.168   1 
   3  11  -2-91.1289 88.0366   4 
   3  11  -2 41.8263 103.140   1 
   3  11  -1 247.419 106.366   4 
   3  11  -1 148.110 116.906   1 
   3  11   0 195.514 134.069   1 
   3  11   0 91.9044 76.9689   4 
   3  11   1 102.704 90.4892   4 
   3  11   2 438.472 149.344   4 
   3  11   3 76.0043 94.0908   4 
   3  11   4 202.863 122.847   4 
  -3 -11  -5 100.033 113.837   2 
   3  12  -8 908.643 294.202   1 
   3  12  -7 768.885 265.068   1 
   3  12  -6 61.7348 156.426   1 
   3  12  -5 281.496 136.265   1 
   3  12  -4 464.891 205.708   1 
   3  12  -3 223.353 152.044   1 
   3  12  -2-308.773 164.278   1 
   3  13  -6-542.923 230.210   1 
   3  13  -5 55.6622 150.500   1 
   3  13  -4-372.014 184.130   1 
  -4  13   0 9.93476 167.284   1 
  -4  13  -1-442.404 243.179   1 
  -4  13  -2-164.542 139.753   1 
  -4  12   4-213.401 165.078   1 
  -4  12   3 115.509 132.241   1 
  -4  12   2 333.440 194.334   1 
  -4  12   1 686.852 236.663   1 
  -4  12   0 648.579 245.153   1 
  -4  12  -1 2170.26 397.678   1 
  -4  12  -2 1456.08 321.345   1 
  -4  12  -3 1082.16 287.512   1 
  -4  12  -4 638.845 249.341   1 
  -4  12  -5 222.465 161.986   1 
  -4  12  -6 767.513 263.012   1 
  -4  11   6 718.548 278.527   1 
  -4  11   5 69.6177 143.606   1 
  -4  11   4-165.331 162.637   1 
  -4  11   3 276.028 187.042   1 
  -4  11   2 1681.08 357.342   1 
  -4  11   1 489.431 215.964   1 
  -4  11   0 1480.75 326.702   1 
  -4  11  -1 0.79526 137.969   1 
  -4  11  -2 267.100 167.755   1 
  -4  11  -3 1569.34 320.085   1 
  -4  11  -4 1251.82 314.189   1 
  -4  11  -5 410.972 222.952   1 
  -4  11  -6 1352.59 315.534   1 
  -4  11  -7 30.8404 144.283   1 
  -4  11  -8-217.130 156.351   1 
  -4  11  -9 1078.76 303.725   1 
  -4  10   8 891.774 294.906   1 
  -4  10   7 339.496 187.372   1 
  -4  10   6 602.179 231.849   1 
  -4  10   5 158.044 180.843   1 
  -4  10   4-156.777 186.717   1 
  -4  10   3 26.7963 116.764   1 
  -4  10   2 74.8974 159.177   1 
  -4  10   1 5697.31 576.113   1 
  -4  10   0 49.0990 124.467   1 
   4 -10   0 5.19195 24.0296   3 
  -4  10  -1 3690.92 456.687   1 
  -4  10  -2 519.423 195.158   1 
  -4  10  -3 668.397 206.737   1 
  -4  10  -4 310.737 150.205   1 
  -4  10  -5 1742.88 334.697   1 
  -4  10  -6 2666.70 415.288   1 
  -4  10  -7 155.347 128.764   1 
  -4  10  -8 532.984 216.040   1 
  -4  10  -9 684.056 256.477   1 
  -4  10 -10 59.9536 120.173   1 
   4  -9 -10 89.3517 119.734   2 
   4  -9  -9 274.824 156.428   2 
   4  -9  -8 115.794 106.486   2 
  -4   9   8 114.142 158.134   1 
   4  -9  -7 758.909 185.457   2 
  -4   9   7 765.948 228.471   1 
   4  -9  -6 1326.82 215.774   2 
  -4   9   6 1102.61 282.146   1 
  -4   9   5 1258.11 277.978   1 
   4  -9  -4 465.908 113.748   2 
   4  -9  -4 586.754 112.856   4 
  -4   9   4 451.625 192.987   1 
   4  -9  -3 5140.45 272.579   4 
  -4   9   3 5500.31 551.172   1 
  -4   9   2 533.576 178.780   1 
   4  -9  -2 491.359 76.3435   4 
   4  -9  -2 565.821 100.360   4 
   4  -9  -1 23.0196 22.8093   4 
   4  -9  -1 0.42566 36.3687   4 
   4  -9  -1 20.3089 46.4552   3 
  -4   9   0 19269.5 985.419   1 
   4  -9   0 20514.7 399.533   3 
  -4   9  -1 3919.91 446.770   1 
  -4   9  -2 5565.47 533.970   1 
  -4   9  -3 6808.14 597.064   1 
  -4   9  -4 96.2298 129.466   1 
  -4   9  -5 25729.8 1148.04   1 
  -4   9  -6 333.963 195.195   1 
  -4   9  -7 231.020 148.059   1 
  -4   9  -8 1706.17 315.194   1 
  -4   9  -9 1409.08 309.141   1 
  -4   9 -10 27.6157 94.6734   1 
  -4   9 -11 317.159 173.325   1 
   4  -8 -12 199.609 167.441   2 
   4  -8 -11 288.233 165.005   2 
   4  -8 -10-51.4461 120.349   2 
   4  -8  -9 485.742 170.527   2 
  -4   8   8 3578.76 452.439   1 
   4  -8  -8 2925.96 366.447   2 
  -4   8   7 3950.96 476.531   1 
   4  -8  -7 4154.02 390.380   2 
   4  -8  -6 1016.92 196.661   2 
  -4   8   6 869.677 255.665   1 
  -4   8   5 4314.73 479.721   1 
   4  -8  -4 5290.99 352.803   2 
  -4   8   4 9076.05 680.802   1 
   4  -8  -3 15669.0 522.288   2 
  -4   8   3 15776.8 871.153   1 
   4  -8  -2 19044.8 568.003   4 
   4  -8  -2 20406.2 597.220   3 
  -4   8   2 18778.2 929.368   1 
  -4   8   1 30489.2 1175.29   1 
   4  -8  -1 30469.4 608.025   4 
   4  -8  -1 32085.5 635.884   3 
  -4   8   0 26008.7 1073.68   1 
   4  -8   0 24277.4 416.361   4 
  -4   8  -1 13836.7 783.351   1 
   4  -8   1 12814.5 194.754   4 
  -4   8  -2 18523.8 907.625   1 
  -4   8  -3 8404.90 611.259   1 
  -4   8  -4 18309.3 903.195   1 
  -4   8  -5 3319.72 201.510   4 
  -4   8  -5 3143.63 165.300   2 
  -4   8  -6 1131.63 258.840   1 
  -4   8  -6 931.563 117.984   2 
  -4   8  -7 1479.98 162.357   2 
  -4   8  -7 1370.58 270.450   1 
  -4   8  -8 1370.03 274.178   1 
  -4   8  -8 1217.72 164.575   2 
  -4   8  -9 34.7638 80.2244   2 
  -4   8  -9 129.840 101.512   1 
  -4   8 -10 1695.14 322.950   1 
  -4   8 -11 658.318 206.971   1 
  -4   8 -12-302.497 160.279   1 
   4  -7 -12 218.464 226.048   2 
   4  -7 -12 453.708 209.127   3 
   4  -7 -11 353.263 176.439   2 
   4  -7 -11 184.676 176.337   3 
   4  -7 -10 266.991 157.692   2 
   4  -7  -9 1408.05 268.479   2 
   4  -7  -8 4861.68 451.577   2 
   4  -7  -7 86.4344 104.751   2 
  -4   7   7 62.5825 125.597   1 
  -4   7   6 7731.54 420.010   2 
  -4   7   6 7585.03 601.224   1 
   4  -7  -6 8254.27 514.340   2 
  -4   7   5 337.071 96.3427   2 
  -4   7   5 201.095 190.077   1 
  -4   7   4 27909.4 673.436   2 
  -4   7   4 26444.9 1074.15   1 
  -4   7   3 8010.82 327.226   2 
   4  -7  -3 7681.92 387.120   2 
  -4   7   3 7887.74 580.626   1 
  -4   7   2 365.940 154.313   1 
   4  -7  -2 400.022 101.983   4 
  -4   7   2 558.120 82.2157   2 
   4  -7  -2 571.785 106.321   3 
  -4   7   1 3278.24 374.274   1 
  -4   7   1 3416.54 160.413   2 
   4  -7  -1 3315.25 225.346   4 
   4  -7  -1 3521.96 206.947   3 
  -4   7   0 2294.64 104.166   2 
  -4   7   0 2555.49 324.287   1 
   4  -7   0 2836.68 178.541   4 
   4  -7   1 255.723 50.4323   4 
  -4   7  -1 565.084 188.258   1 
  -4   7  -2 696.886 52.9992   2 
   4  -7   2 877.883 84.4908   4 
  -4   7  -2 718.015 187.723   1 
  -4   7  -2 827.616 60.1007   2 
  -4   7  -3 3271.66 145.983   2 
   4  -7   3 3368.13 168.330   4 
  -4   7  -3 2948.69 344.775   1 
  -4   7  -3 3090.91 160.808   2 
  -4   7  -4 29952.8 527.841   2 
  -4   7  -4 30425.9 1080.62   1 
  -4   7  -4 29854.2 646.169   4 
  -4   7  -5 57.9695 102.423   1 
  -4   7  -5-9.21522 65.2095   4 
  -4   7  -5 100.431 67.9247   2 
  -4   7  -6 217.309 128.715   1 
  -4   7  -6 163.366 73.0382   4 
  -4   7  -6 177.272 77.3583   2 
  -4   7  -7 1774.23 201.623   2 
  -4   7  -7 1721.62 205.608   4 
  -4   7  -7 1317.23 259.984   1 
  -4   7  -8 4.59221 72.3501   2 
  -4   7  -8-68.5802 143.360   1 
  -4   7  -9 1660.44 223.568   2 
  -4   7  -9 1458.87 289.513   1 
  -4   7 -10 3458.42 330.728   2 
  -4   7 -10 3038.99 403.410   1 
  -4   7 -11 164.955 133.726   1 
  -4   7 -11-28.7531 80.9355   2 
  -4   7 -12 246.255 166.507   1 
  -4   7 -12 149.027 115.593   2 
  -4   7 -13 1140.63 288.507   1 
   4  -6 -13-159.469 176.838   2 
   4  -6 -12-118.997 139.494   2 
   4  -6 -12-123.886 141.197   3 
   4  -6 -11-12.9684 105.580   2 
   4  -6 -11-9.71037 136.817   3 
   4  -6 -10 551.577 201.546   2 
   4  -6 -10 633.328 212.929   3 
   4  -6  -9-57.0044 120.492   2 
   4  -6  -9 41.0935 118.747   3 
   4  -6  -8 533.638 166.471   2 
   4  -6  -7 46.4392 92.6345   2 
  -4   6   7-444.112 188.530   1 
   4  -6  -6 341.391 126.658   2 
  -4   6   6 228.487 157.155   1 
  -4   6   6 567.909 126.162   2 
   4  -6  -6 755.618 180.277   3 
  -4   6   5 30622.2 788.209   2 
   4  -6  -5 31608.9 929.596   3 
  -4   6   5 31781.1 1123.57   1 
  -4   6   4 1122.75 147.713   2 
  -4   6   4 873.048 211.321   1 
  -4   6   3 2642.47 200.754   2 
   4  -6  -3 2204.35 212.948   3 
   4  -6  -3 1969.53 205.706   2 
  -4   6   3 2432.46 317.462   1 
  -4   6   2 2276.73 167.272   2 
   4  -6  -2 2557.57 226.593   4 
   4  -6  -2 2546.06 205.901   3 
  -4   6   2 2578.13 316.349   1 
  -4   6   1 305.917 134.513   1 
  -4   6   1 201.712 50.3718   2 
   4  -6  -1 132.409 72.3269   4 
   4  -6  -1 122.166 48.7344   3 
  -4   6   0 17505.3 778.696   1 
   4  -6   0 18157.6 500.018   4 
   4  -6   0 19272.4 768.049   1 
  -4   6   0 18175.7 401.422   2 
  -4   6  -1 95.9113 40.5941   2 
  -4   6  -1 161.344 125.608   1 
   4  -6   1 97.2524 51.2755   4 
   4  -6   1 115.290 65.8612   1 
   4  -6   2 3382.60 191.427   4 
  -4   6  -2 3255.17 336.879   1 
   4  -6   2 3494.81 318.534   1 
  -4   6  -2 3194.23 189.285   2 
   4  -6   3 4444.81 223.624   4 
  -4   6  -3 4116.52 377.232   1 
  -4   6  -3 4627.46 269.248   4 
   4  -6   3 4997.56 375.940   1 
  -4   6  -4 1405.96 239.671   1 
  -4   6  -4 1336.94 137.286   2 
  -4   6  -4 1472.36 167.604   4 
   4  -6   4 1483.78 143.501   4 
   4  -6   5 13112.5 445.302   4 
  -4   6  -5 14612.0 469.566   2 
  -4   6  -5 14661.6 542.466   4 
  -4   6  -5 13445.7 686.218   1 
  -4   6  -6 14071.0 509.609   2 
  -4   6  -6 13224.6 551.699   4 
  -4   6  -7 13438.7 551.189   2 
  -4   6  -7 13137.9 581.606   4 
  -4   6  -7 12808.2 699.248   1 
  -4   6  -7 13591.8 407.408   3 
  -4   6  -8 7792.12 453.188   2 
  -4   6  -8 6812.37 528.835   1 
  -4   6  -8 8379.52 493.128   4 
  -4   6  -8 7716.33 362.118   3 
  -4   6  -9 576.117 179.881   1 
  -4   6  -9 916.435 183.519   2 
  -4   6  -9 540.597 122.258   3 
  -4   6 -10 259.028 140.303   1 
  -4   6 -10 166.935 102.048   2 
  -4   6 -11 299.149 139.424   1 
  -4   6 -11-58.5341 100.614   2 
  -4   6 -12 97.9485 110.647   1 
  -4   6 -12 306.063 134.832   2 
  -4   6 -13 906.147 247.228   1 
  -4   6 -13 1424.66 280.937   2 
   4  -5 -13 476.393 205.068   2 
   4  -5 -12 287.511 181.705   2 
   4  -5 -12 379.512 198.138   3 
   4  -5 -11 731.265 237.079   2 
   4  -5 -11 761.034 228.857   3 
   4  -5 -10 169.971 155.118   2 
   4  -5 -10 133.490 136.232   3 
   4  -5  -9 2079.63 317.583   2 
   4  -5  -9 2318.16 339.883   3 
   4  -5  -8 385.489 157.790   2 
   4  -5  -8 493.385 194.848   3 
   4  -5  -7 100.243 104.658   2 
   4  -5  -7 180.394 116.247   3 
  -4   5   6 12668.3 553.093   2 
   4  -5  -6 12592.7 626.815   3 
  -4   5   6 11941.8 675.483   1 
   4  -5  -6 13244.3 642.497   2 
  -4   5   5 3306.44 263.791   2 
   4  -5  -5 3258.39 302.541   3 
  -4   5   5 2636.32 320.187   1 
  -4   5   4 4245.99 277.554   2 
  -4   5   4 4214.18 398.170   1 
  -4   5   3 2345.38 192.910   2 
   4  -5  -3 2430.11 290.236   1 
   4  -5  -3 2464.74 229.455   3 
   4  -5  -3 2402.56 228.285   2 
  -4   5   3 2544.77 296.451   1 
  -4   5   2 6.28755 37.1706   2 
   4  -5  -2 62.8478 70.8564   4 
   4  -5  -2 14.2762 65.7495   1 
   4  -5  -2-19.2311 49.4760   3 
  -4   5   2-6.81015 86.2987   1 
  -4   5   1 60.2247 72.0781   1 
   4  -5  -1 182.307 75.5923   4 
   4  -5  -1 49.6288 58.1038   1 
  -4   5   1 64.7912 46.7954   2 
  -4   5   0 2271.65 270.343   1 
   4  -5   0 2526.57 267.571   1 
   4  -5   0 2427.02 195.955   4 
  -4   5   0 2343.54 174.943   2 
   4  -5   1 9020.17 356.540   4 
   4  -5   1 9578.03 498.748   1 
  -4   5  -1 9164.05 511.409   1 
  -4   5  -1 9455.61 355.225   2 
   4  -5   2 748.351 106.377   4 
   4  -5   2 1143.50 181.121   1 
  -4   5  -2 847.858 122.353   4 
  -4   5  -2 832.681 165.887   1 
   4  -5   3 805.531 143.315   1 
   4  -5   3 620.245 101.729   4 
  -4   5  -3 535.035 104.033   4 
  -4   5  -3 829.026 165.323   1 
   4  -5   4 13322.8 444.383   4 
  -4   5  -4 14052.9 531.302   4 
  -4   5  -4 13621.3 626.414   1 
  -4   5  -4 12872.5 213.697   3 
  -4   5  -5 40689.8 1102.90   1 
  -4   5  -5 42354.3 844.771   2 
  -4   5  -5 40598.1 955.472   4 
  -4   5  -6 5057.73 322.440   2 
  -4   5  -6 4524.84 379.153   1 
  -4   5  -6 4838.57 349.769   4 
  -4   5  -7 4551.72 330.642   2 
  -4   5  -7 4266.34 343.940   4 
  -4   5  -7 3924.33 366.790   1 
  -4   5  -8 721.099 181.593   1 
  -4   5  -8 998.287 184.588   2 
  -4   5  -9 1324.39 241.457   1 
  -4   5  -9 1308.07 216.795   2 
  -4   5 -10 1346.58 247.775   1 
  -4   5 -10 1097.37 212.506   2 
  -4   5 -11 1925.14 284.434   2 
  -4   5 -11 1607.18 283.052   1 
  -4   5 -11 1747.58 254.718   3 
  -4   5 -12 10.5038 107.399   2 
  -4   5 -12 5.04633 83.0260   1 
  -4   5 -13-62.6295 107.851   2 
  -4   5 -13 237.864 123.665   1 
   4  -4 -13 860.335 264.178   2 
   4  -4 -13 874.183 280.557   3 
   4  -4 -12 609.931 222.631   2 
   4  -4 -12 578.332 212.764   3 
   4  -4 -11 752.961 233.108   2 
   4  -4 -11 665.638 220.049   3 
   4  -4 -10 1008.47 261.185   2 
   4  -4 -10 1358.80 270.592   3 
   4  -4  -9 15134.3 818.539   3 
   4  -4  -9 15346.3 822.545   2 
   4  -4  -8 17588.2 844.320   3 
   4  -4  -8 18027.3 846.330   2 
   4  -4  -7 23928.2 913.425   3 
   4  -4  -7 22544.1 900.812   2 
  -4   4   6 8609.30 459.180   2 
   4  -4  -6 7998.44 503.984   3 
   4  -4  -6 8137.20 515.692   2 
  -4   4   5 1425.76 176.168   2 
  -4   4   5 1617.08 245.168   1 
   4  -4  -5 1389.48 206.013   3 
  -4   4   4 3259.89 246.959   2 
   4  -4  -4 3017.52 317.171   1 
  -4   4   4 3671.35 337.057   1 
   4  -4  -3 11954.2 597.059   1 
   4  -4  -3 11574.7 482.264   3 
   4  -4  -3 11694.8 510.717   2 
  -4   4   3 10986.3 565.584   1 
  -4   4   3 11364.8 439.674   2 
   4  -4  -2 23486.8 803.739   1 
   4  -4  -2 22771.6 691.341   4 
  -4   4   2 22524.5 786.238   1 
  -4   4   2 23040.6 609.188   2 
   4  -4  -1 1866.66 218.215   1 
   4  -4  -1 1760.64 188.177   4 
  -4   4   1 1561.98 160.068   2 
  -4   4   1 1902.22 230.822   1 
  -4   4   0 3339.73 296.235   1 
   4  -4   0 3239.64 239.748   4 
   4  -4   0 3961.88 307.902   1 
  -4   4   0 2957.62 215.607   2 
  -4   4  -1 53.6458 68.4216   1 
   4  -4   1 26.4951 55.3324   4 
   4  -4   1-55.3670 60.6387   1 
  -4   4  -1 4.07934 51.1906   4 
  -4   4  -1-10.8605 27.5229   3 
  -4   4  -2 21983.1 722.332   1 
   4  -4   2 21463.5 584.147   4 
  -4   4  -2 20536.9 625.117   4 
   4  -4   2 21006.6 658.575   1 
   4  -4   3 22092.6 588.717   4 
  -4   4  -3 21981.7 721.735   1 
  -4   4  -3 21620.5 662.006   4 
   4  -4   3 22219.1 660.837   1 
  -4   4  -4 43859.9 976.618   4 
  -4   4  -4 43006.1 1026.57   1 
  -4   4  -5 3582.45 306.060   1 
  -4   4  -5 3431.65 290.514   4 
   4  -4   6 7735.13 407.135   4 
  -4   4  -6 7549.50 411.671   2 
  -4   4  -6 7328.80 443.779   4 
  -4   4  -6 6924.09 434.735   1 
   4  -4   7 3261.44 286.346   4 
  -4   4  -7 3680.73 330.848   4 
  -4   4  -7 3001.59 279.208   2 
  -4   4  -7 3453.54 322.126   1 
  -4   4  -8 377.015 125.896   1 
  -4   4  -8 352.757 123.107   2 
  -4   4  -9 2412.17 291.930   2 
  -4   4  -9 2377.30 288.453   1 
  -4   4 -10 2796.28 336.904   2 
  -4   4 -10 2182.88 297.041   1 
  -4   4 -11 2710.89 347.073   2 
  -4   4 -11 2454.16 320.470   1 
  -4   4 -12 407.399 157.308   1 
  -4   4 -12 353.723 152.747   2 
  -4   4 -13 96.2542 96.0294   1 
  -4   4 -13 217.493 130.837   2 
   4  -3 -13 393.786 201.063   2 
   4  -3 -13 23.2608 158.309   3 
   4  -3 -12 192.654 140.943   2 
   4  -3 -12 96.0010 153.287   3 
   4  -3 -11 208.141 178.717   2 
   4  -3 -11 119.069 148.961   3 
   4  -3 -10-133.850 131.935   2 
   4  -3 -10-71.7655 123.975   3 
   4  -3  -9 2819.77 377.590   3 
   4  -3  -9 2695.14 356.096   2 
   4  -3  -8 2844.52 354.693   3 
   4  -3  -8 2554.92 346.424   2 
   4  -3  -7 457.343 178.213   2 
   4  -3  -7 6.72078 115.742   3 
   4  -3  -6 1090.36 210.984   2 
  -4   3   6 1046.14 166.248   2 
   4  -3  -6 781.503 187.514   3 
   4  -3  -5 12265.8 598.030   2 
   4  -3  -5 12480.1 633.002   1 
  -4   3   5 12867.2 522.790   2 
   4  -3  -4 1778.63 231.107   1 
  -4   3   4 1876.66 232.278   1 
  -4   3   4 1441.66 175.091   2 
   4  -3  -3 928.306 167.433   1 
  -4   3   3 907.078 136.891   2 
  -4   3   3 681.740 146.670   1 
   4  -3  -3 751.904 146.526   2 
   4  -3  -2 2501.05 247.164   1 
   4  -3  -2 2807.54 256.996   4 
  -4   3   2 2478.99 248.836   1 
  -4   3   2 2916.80 236.398   2 
   4  -3  -1 1700.38 189.372   4 
   4  -3  -1 1577.63 189.728   1 
  -4   3   1 1980.58 162.081   3 
  -4   3   1 1797.83 185.166   2 
  -4   3   1 2053.82 219.303   1 
  -4   3   0 25115.9 716.701   1 
  -4   3   0 24099.1 679.910   4 
   4  -3   0 25867.8 696.175   4 
   4  -3   0 25249.1 708.011   1 
  -4   3   0 25969.3 548.319   3 
  -4   3  -1 43140.2 919.981   1 
   4  -3   1 44744.5 895.382   4 
   4  -3   1 43906.3 890.693   1 
  -4   3  -1 44303.5 933.777   4 
  -4   3  -2 71846.7 1183.06   1 
   4  -3   2 71929.8 1125.97   4 
  -4   3  -2 73825.7 1249.33   4 
   4  -3   2 72740.0 1092.01   1 
  -4   3  -3 19735.6 618.986   1 
  -4   3  -3 20731.8 673.460   4 
  -4   3  -4 1383.92 175.498   1 
  -4   3  -4 2053.38 223.023   4 
   4  -3   5 7873.62 402.407   4 
  -4   3  -5 7490.12 441.670   4 
  -4   3  -5 7503.89 398.966   1 
   4  -3   6 3202.19 278.873   4 
  -4   3  -6 2567.86 271.975   4 
  -4   3  -6 3331.37 277.309   1 
  -4   3  -7 992.740 167.796   1 
   4  -3   7 1313.51 197.112   4 
  -4   3  -7 1324.81 198.191   2 
   4  -3   8-23.5504 98.3534   4 
  -4   3  -8 44.0389 67.4758   1 
  -4   3  -8-55.2663 111.108   2 
  -4   3  -9 3391.80 350.525   2 
  -4   3  -9 3678.52 336.209   1 
  -4   3 -10-46.3252 75.6875   1 
  -4   3 -10 223.927 118.393   2 
  -4   3 -11 32.9247 121.069   2 
  -4   3 -11 219.042 110.889   1 
  -4   3 -12 1234.65 253.444   2 
  -4   3 -12 956.178 220.111   1 
  -4   3 -13 101.158 130.588   2 
   4  -2 -13 261.946 214.370   2 
   4  -2 -13 255.059 176.376   3 
   4  -2 -12 286.096 194.267   2 
   4  -2 -12 321.826 205.752   3 
   4  -2 -11 67.7736 129.411   2 
   4  -2 -11 97.5436 139.985   3 
   4  -2 -10 1176.55 261.767   2 
   4  -2 -10 1003.30 258.025   3 
   4  -2  -9 1677.57 292.652   2 
   4  -2  -9 1621.43 286.380   3 
   4  -2  -8 3497.44 385.818   3 
   4  -2  -8 4028.52 410.165   2 
   4  -2  -7 17736.2 787.489   3 
   4  -2  -7 17607.2 798.842   2 
  -4   2   6 46505.6 1058.49   2 
   4  -2  -6 45897.9 1191.59   3 
   4  -2  -6 46546.1 1226.32   2 
   4  -2  -6 47129.0 1243.56   1 
   4  -2  -5 34343.8 986.840   3 
   4  -2  -5 36989.3 1042.70   2 
   4  -2  -5 36257.7 1032.14   1 
  -4   2   5 34528.4 883.261   2 
  -4   2   4 510.580 115.475   2 
   4  -2  -4 497.535 119.316   1 
  -4   2   3 126760. 1523.42   3 
  -4   2   3 125360. 1615.17   1 
   4  -2  -3 124317. 1706.60   1 
   4  -2  -2 125540. 1636.82   1 
  -4   2   2 128750. 1470.20   3 
  -4   2   2 128995. 1560.54   1 
  -4   2   2 129996. 1627.27   2 
   4  -2  -1 17459.8 569.751   1 
   4  -2  -1 17507.7 614.517   4 
  -4   2   1 17303.7 521.941   3 
  -4   2   1 18135.2 608.318   2 
  -4   2   1 19310.1 583.944   1 
   4  -2   0 92504.8 1222.25   1 
  -4   2   0 92994.9 1390.95   4 
  -4   2   0 89278.3 1198.59   1 
  -4   2  -1 602.455 105.798   1 
   4  -2   1 542.376 91.8634   1 
   4  -2   1 390.554 104.076   4 
  -4   2  -1 561.046 113.613   4 
  -4   2  -2 39537.7 766.500   1 
   4  -2   2 39745.2 699.631   1 
  -4   2  -3 8723.41 365.628   1 
  -4   2  -3 8901.34 460.783   4 
  -4   2  -4 5594.76 382.778   4 
  -4   2  -4 5256.15 290.350   1 
   4  -2   4 5359.54 338.037   4 
   4  -2   5 1372.52 191.731   4 
  -4   2  -5 1673.70 217.134   4 
  -4   2  -5 1636.16 171.563   1 
  -4   2  -6 453.568 102.036   1 
   4  -2   6 529.893 132.620   4 
  -4   2  -6 488.288 123.525   4 
   4  -2   7 116.489 117.721   4 
  -4   2  -7-42.5341 67.6467   1 
   4  -2   8 2213.64 282.221   4 
  -4   2  -8 2558.36 305.632   2 
  -4   2  -8 2157.68 230.641   1 
  -4   2  -9 2693.91 274.433   1 
  -4   2  -9 2214.45 305.786   2 
  -4   2 -10 196.926 91.4904   1 
  -4   2 -10-85.7649 148.282   2 
  -4   2 -11 3000.54 385.991   2 
  -4   2 -11 2164.28 273.938   1 
  -4   2 -12 214.510 105.350   1 
  -4   2 -12 124.087 155.698   2 
  -4   2 -13-149.370 183.520   2 
   4  -1 -14 260.819 208.149   2 
   4  -1 -14 356.192 231.094   3 
   4  -1 -13 166.385 194.578   2 
   4  -1 -13 76.7224 112.669   3 
   4  -1 -12 80.4895 151.356   2 
   4  -1 -12-13.9114 141.192   3 
   4  -1 -11 606.229 213.757   2 
   4  -1 -11 969.551 267.005   3 
   4  -1 -10-117.443 175.108   2 
   4  -1 -10 342.992 170.658   3 
   4  -1  -9 2560.00 358.627   3 
   4  -1  -9 2780.17 368.411   2 
   4  -1  -8 1271.14 250.946   2 
   4  -1  -8 1368.39 258.062   3 
   4  -1  -7 18736.1 819.328   3 
   4  -1  -7 18387.9 821.560   2 
   4  -1  -6 47967.1 1235.86   3 
   4  -1  -6 49437.3 1222.18   1 
   4  -1  -6 50168.4 1293.01   2 
  -4   1   6 48819.6 1107.82   2 
   4  -1  -5 34.7556 93.8889   2 
  -4   1   5 101.655 68.9884   2 
   4  -1  -5 26.7960 55.5355   1 
  -4   1   4 10818.6 489.340   3 
   4  -1  -4 11425.3 522.289   1 
  -4   1   4 11166.1 515.951   2 
  -4   1   3 46300.5 974.527   3 
  -4   1   3 48373.6 1050.06   2 
   4  -1  -3 48684.9 1005.34   1 
   4  -1  -2 655.031 124.224   1 
  -4   1   2 580.900 118.945   2 
  -4   1   2 679.292 120.329   3 
   4  -1  -1 47675.4 853.362   1 
  -4   1   1 49001.6 1043.66   4 
  -4   1   1 47358.4 800.235   1 
  -4   1   0 566.891 120.151   4 
   4  -1   0 467.586 81.2494   1 
  -4   1   0 626.903 89.4188   1 
   4  -1   1 30816.8 550.323   1 
  -4   1  -1 31369.0 572.226   1 
  -4   1  -1 31738.0 867.154   4 
  -4   1  -2 8952.19 300.264   1 
  -4   1  -2 8810.42 465.246   4 
  -4   1  -3 20035.9 458.380   1 
  -4   1  -3 21827.5 748.782   4 
   4  -1   4 3890.93 307.892   4 
  -4   1  -4 4560.30 230.205   1 
  -4   1  -4 4341.83 344.699   4 
   4  -1   5 4228.21 323.198   4 
  -4   1  -5 4738.53 374.479   4 
  -4   1  -5 4130.32 232.147   1 
   4  -1   6 232.708 124.629   4 
  -4   1  -6 299.886 84.5121   1 
   4  -1   7 8947.48 513.349   4 
  -4   1  -7 8914.48 396.617   1 
   4  -1   8 3816.87 364.332   4 
  -4   1  -8 3563.13 359.626   2 
  -4   1  -8 3400.37 270.298   1 
  -4   1  -9 2384.42 315.300   2 
  -4   1 -10 200.140 124.784   2 
  -4   1 -11 939.232 223.032   2 
  -4   1 -12 86.5979 112.760   2 
   4   0 -14 166.893 203.046   2 
   4   0 -14-126.079 168.219   3 
   4   0 -13-43.2848 181.225   2 
   4   0 -13 126.691 145.648   3 
   4   0 -12 59.5367 154.136   2 
   4   0 -12 101.905 134.971   3 
   4   0 -11 141.577 147.624   2 
   4   0 -11 199.959 183.212   3 
   4   0 -10 352.752 186.775   2 
   4   0 -10 453.648 192.395   3 
   4   0  -9-29.0230 108.553   2 
   4   0  -9-26.4782 133.390   3 
   4   0  -8 281.750 133.145   2 
   4   0  -8 236.897 136.421   3 
   4   0  -7 2358.85 313.963   2 
   4   0  -6 5175.44 387.087   1 
   4   0  -6 5269.48 440.568   2 
  -4   0   6 5553.62 390.324   2 
  -4   0   5 3151.24 286.929   3 
   4   0  -5 3507.11 296.779   1 
  -4   0   5 3110.68 291.714   2 
  -4   0   4 25575.5 791.421   3 
   4   0  -4 26650.3 755.345   1 
  -4   0   4 26948.9 827.584   2 
  -4   0   3 163.928 78.8931   2 
   4   0  -3 112.972 62.3654   1 
  -4   0   3 208.635 86.7902   3 
  -4   0   2 22769.5 749.236   2 
   4   0  -2 23920.2 609.256   1 
  -4   0   1 20894.7 705.944   4 
   4   0  -1 20650.4 504.480   1 
   4   0   0 41231.9 621.645   1 
  -4   0   0 40993.3 1000.66   4 
  -4   0  -1 33326.0 921.860   4 
   4   0   1 34410.4 434.447   1 
  -4   0  -2 645.748 137.372   4 
  -4   0  -3 49.3102 19.7063   1 
  -4   0  -3 166.553 87.5693   4 
   4   0   4 19878.7 698.649   4 
  -4   0  -4 19233.6 356.385   1 
   4   0   5 3556.04 307.021   4 
  -4   0  -5 3689.72 185.032   1 
  -4   0  -6 6872.76 286.522   1 
   4   0   6 7582.02 457.715   4 
  -4   0  -7 215.084 71.3714   1 
   4   0   7 156.982 108.643   4 
   4   0   8 7386.19 512.173   4 
  -4   0  -8 7353.06 519.343   2 
   4   0   9-126.912 155.746   4 
  -4   0  -9 46.2659 95.4028   2 
  -4   0 -10 58.3367 115.911   2 
  -4   0 -11 170.059 138.927   2 
  -4   0 -12-14.8088 118.937   2 
   4   1 -14 746.801 257.355   3 
   4   1 -14 1355.89 372.323   2 
   4   1 -13 375.685 200.249   2 
   4   1 -13 115.809 152.841   3 
   4   1 -12 304.256 186.916   2 
   4   1 -12 350.503 200.744   3 
   4   1 -11 72.6326 143.486   2 
   4   1 -11 585.006 219.608   3 
   4   1 -10 2141.99 372.995   2 
   4   1  -9-49.2465 164.004   2 
   4   1  -8 15306.5 810.984   2 
   4   1  -7 6441.99 502.554   2 
  -4  -1   6-17.3885 65.4163   2 
  -4  -1   6 113.696 62.7943   3 
  -4  -1   5 611.106 135.831   2 
  -4  -1   5 552.966 139.011   3 
  -4  -1   4 5837.14 391.638   3 
  -4  -1   4 5818.23 399.226   2 
   4   1  -3 8284.88 375.301   1 
  -4  -1   3 9533.27 506.866   2 
   4   1  -2 3643.19 225.491   1 
  -4  -1   2 3578.84 312.447   2 
  -4  -1   1 14982.6 623.948   4 
   4   1  -1 14735.5 391.996   1 
   4   1   0 7909.30 228.097   1 
  -4  -1   0 8508.40 473.546   4 
  -4  -1  -1 20310.4 744.326   4 
  -4  -1  -2 11658.1 569.744   4 
  -4  -1  -3 214.344 113.005   4 
   4   1   4 568.099 151.729   4 
   4   1   5 6263.04 430.537   4 
  -4  -1  -5 6024.44 169.978   1 
  -4  -1  -5 5884.51 174.945   1 
   4   1   6 3316.94 330.574   4 
  -4  -1  -6 3548.86 173.428   1 
  -4  -1  -6 3387.59 182.975   1 
   4   1   7 160.255 149.688   4 
  -4  -1  -7-14.3897 45.4885   1 
   4   1   8 660.541 197.140   4 
   4   1   9 460.107 163.725   4 
  -4  -1  -9 627.571 183.407   2 
  -4  -1 -10-91.7983 125.818   2 
  -4  -1 -11 303.905 182.759   2 
   4   2 -14 1608.53 371.036   2 
   4   2 -13 1222.28 315.230   2 
   4   2 -12 2147.48 381.395   2 
   4   2 -11 2345.69 388.076   2 
   4   2 -10 35.9220 238.918   2 
   4   2  -9 3093.08 400.167   2 
   4   2  -8 1004.82 245.851   2 
   4   2  -7 542.930 186.835   2 
   4   2  -6 443.647 155.443   2 
  -4  -2   5 687.077 154.050   2 
   4   2  -5 477.877 154.454   4 
  -4  -2   5 728.315 162.999   3 
  -4  -2   4 777.869 160.292   2 
   4   2  -4 439.234 132.632   4 
  -4  -2   3 49358.0 1192.00   2 
  -4  -2   2 33210.7 954.163   4 
  -4  -2   2 35440.0 999.402   2 
  -4  -2   1 14282.6 632.472   4 
  -4  -2   0 20836.8 773.331   4 
   4   2   0 20199.5 323.656   1 
  -4  -2  -1 46.8292 80.8743   4 
  -4  -2  -2 1573.59 219.550   4 
   4   2   3 4463.60 349.428   4 
  -4  -2  -3 4872.84 391.582   4 
   4   2   4 31489.5 930.922   4 
   4   2   5 648.235 172.806   4 
  -4  -2  -6 2544.13 136.376   1 
   4   2   6 2539.67 295.892   4 
  -4  -2  -7 6433.05 279.898   1 
   4   2   7 6120.50 467.981   4 
   4   2   8 11593.2 668.596   4 
   4   2   9 1202.87 259.911   4 
  -4  -2  -9 832.424 239.047   2 
  -4  -2 -10 2540.48 368.949   2 
  -4  -2 -11 1225.89 293.384   2 
   4   3 -14 102.074 175.082   2 
   4   3 -13 52.2829 137.971   2 
   4   3 -12 42.3078 128.807   2 
   4   3 -11 3106.56 439.387   2 
   4   3 -10 1933.77 353.178   2 
   4   3  -9 1183.52 263.157   2 
   4   3  -8 13946.0 806.465   2 
   4   3  -7 7841.10 583.823   2 
   4   3  -6 3856.75 379.099   4 
   4   3  -5 2036.04 282.901   4 
  -4  -3   5 1792.51 243.988   2 
  -4  -3   4 429.281 125.868   2 
   4   3  -4 205.395 115.721   4 
   4   3  -3 21011.1 803.321   4 
  -4  -3   3 22374.2 826.422   2 
   4   3  -2 6954.17 456.930   4 
  -4  -3   2 6764.44 443.287   4 
   4   3  -1 8155.74 487.111   4 
  -4  -3   1 8685.26 508.638   4 
   4   3   0 567.131 62.9113   1 
   4   3   0 395.940 131.944   4 
  -4  -3   0 599.926 147.502   4 
   4   3   1 1054.15 179.376   4 
  -4  -3  -1 1029.75 186.622   4 
   4   3   2 1094.35 190.066   4 
  -4  -3  -2 806.651 167.372   4 
   4   3   3 10670.2 549.150   4 
   4   3   4 1965.64 256.944   4 
   4   3   5 244.972 135.755   4 
  -4  -3  -6 210.822 34.9530   1 
   4   3   6 149.201 125.128   4 
   4   3   7 5895.28 473.982   4 
   4   3   8 1587.55 285.533   4 
   4   3   9 126.418 136.317   4 
  -4  -3  -9 448.641 176.685   2 
  -4  -3 -10 426.221 159.973   2 
   4   4 -13 188.829 187.621   2 
   4   4 -12 58.1394 175.310   2 
   4   4 -11 102.890 139.170   2 
   4   4 -10 1624.69 332.220   2 
   4   4  -9 5445.41 531.500   2 
   4   4  -8 1937.92 317.092   2 
   4   4  -8 1813.01 291.280   4 
   4   4  -7 11340.5 677.471   4 
   4   4  -6 266.039 154.513   4 
   4   4  -5 2527.58 313.824   4 
   4   4  -4 4013.26 371.498   4 
  -4  -4   4 4197.59 375.577   2 
   4   4  -3 4673.09 390.482   4 
  -4  -4   3 4515.24 387.925   2 
   4   4  -2 1557.30 227.481   4 
  -4  -4   2 1365.50 207.439   4 
   4   4  -1 8743.88 517.320   4 
   4   4  -1 8110.01 316.703   1 
  -4  -4   1 8714.21 523.870   4 
  -4  -4   0 214.415 103.733   4 
   4   4   0 243.673 55.7756   1 
   4   4   1 41.4832 23.2383   1 
   4   4   1-8.18801 128.177   4 
   4   4   2 830.947 189.776   4 
   4   4   3 6102.22 436.144   4 
   4   4   4 1251.70 234.667   4 
   4   4   5 80.0301 129.356   4 
   4   4   6 2680.37 323.117   4 
   4   4   7 436.759 176.980   4 
   4   4   8 1429.73 268.307   4 
   4   4   9 222.448 181.162   4 
  -4  -4  -9-81.3577 132.048   2 
  -4  -4 -10-19.0802 151.120   2 
   4   5 -13-25.8174 132.992   2 
   4   5 -12-175.066 148.915   2 
   4   5 -11 1434.72 319.271   2 
   4   5 -10 1532.31 304.682   2 
   4   5  -9 86.6210 139.092   4 
   4   5  -9 122.721 132.735   2 
   4   5  -8 395.603 153.930   4 
   4   5  -7 1856.17 280.454   4 
   4   5  -6 14511.0 754.460   4 
   4   5  -5 15716.5 763.022   4 
   4   5  -4 4156.69 382.210   4 
   4   5  -3 2109.04 277.119   4 
  -4  -5   2 2184.65 276.097   4 
   4   5  -2 2120.96 204.600   1 
   4   5  -2 2062.80 263.558   4 
   4   5  -1 167.616 118.201   4 
   4   5  -1 76.1129 62.1680   1 
   4   5   0-56.7834 140.054   4 
   4   5   0 144.202 56.6365   1 
   4   5   1 2109.00 152.556   1 
   4   5   1 2135.81 274.300   4 
   4   5   2 94.4749 93.2740   4 
   4   5   2 275.631 50.2660   1 
   4   5   3 3308.77 337.062   4 
   4   5   4 79.2658 98.5899   4 
   4   5   5 2503.66 310.859   4 
   4   5   6 277.655 154.264   4 
   4   5   7 510.634 171.591   4 
   4   5   8 733.370 210.778   4 
  -4  -5  -9 260.071 167.908   2 
   4   6 -13-30.1287 160.109   2 
   4   6 -12 551.275 231.169   2 
   4   6 -11-69.2792 118.281   4 
   4   6 -11 3.19567 113.641   2 
   4   6 -10 460.611 189.752   4 
   4   6  -9 504.847 181.063   4 
   4   6  -8 1224.78 250.067   4 
   4   6  -7 800.998 207.558   4 
   4   6  -6 10796.7 665.671   4 
   4   6  -5-90.2964 139.125   4 
   4   6  -4 1666.77 256.316   4 
   4   6  -4 1816.65 228.225   1 
   4   6  -3 12426.2 659.031   4 
   4   6  -2 5473.61 431.157   4 
   4   6  -1 2333.13 291.332   4 
   4   6  -1 3105.57 253.720   1 
   4   6   0 2669.53 222.964   1 
   4   6   0 2204.29 272.011   4 
   4   6   1 8693.82 368.028   1 
   4   6   1 9022.31 542.175   4 
   4   6   2 17164.6 743.684   4 
   4   6   2 17351.2 459.828   1 
   4   6   3 1303.57 236.891   4 
   4   6   4 168.560 128.139   4 
   4   6   5 696.471 176.858   4 
   4   6   6 813.531 200.551   4 
   4   6   7-33.1597 124.725   4 
   4   6   8 388.692 178.996   4 
  -4  -6  -8 708.793 243.104   2 
  -4  -6  -9 255.975 165.954   2 
   4   7 -13 647.021 227.566   4 
   4   7 -13 311.477 196.178   2 
   4   7 -12-23.2066 94.6295   4 
   4   7 -11 350.780 183.583   4 
   4   7 -10-284.546 155.745   4 
   4   7  -9 317.153 176.247   4 
   4   7  -8 141.246 125.809   4 
   4   7  -7 1610.66 281.672   4 
   4   7  -6-67.7689 106.551   4 
   4   7  -6 370.811 153.566   1 
   4   7  -5 1122.73 227.693   4 
   4   7  -5 1201.38 218.843   1 
   4   7  -4 3899.26 389.359   4 
   4   7  -4 4134.95 358.600   1 
   4   7  -3-132.076 152.610   4 
   4   7  -3 106.204 93.1097   1 
   4   7  -2 292.810 136.677   4 
   4   7  -1 1344.66 229.102   4 
   4   7   0 309.262 125.820   4 
   4   7   0 521.564 124.525   1 
   4   7   1 2741.95 242.936   1 
   4   7   1 2764.28 318.118   4 
   4   7   2 183.806 127.494   4 
   4   7   2 113.276 67.2559   1 
   4   7   3 3067.36 338.326   4 
   4   7   3 2712.76 202.354   1 
   4   7   4 552.103 174.394   4 
   4   7   5 1016.77 225.325   4 
   4   7   6-117.072 132.282   4 
   4   7   7-470.342 185.728   4 
   4   7   8 4.49438 115.239   4 
  -4  -7  -8-63.1865 137.307   2 
   4   8 -13 176.058 139.744   4 
   4   8 -12-8.99930 73.7752   4 
   4   8 -11-266.791 151.136   4 
   4   8 -10 83.5670 109.019   4 
   4   8  -9 416.516 184.465   4 
   4   8  -8 1741.96 302.109   1 
   4   8  -8 1208.04 263.361   4 
   4   8  -7 2382.94 333.224   1 
   4   8  -7 2033.05 307.365   4 
   4   8  -6 1529.59 267.975   1 
   4   8  -6 1197.39 239.105   4 
   4   8  -5-2.41633 110.849   1 
   4   8  -5 102.655 116.321   4 
   4   8  -4-56.0481 106.668   4 
   4   8  -4 155.322 104.807   1 
   4   8  -3 1266.14 223.544   4 
   4   8  -3 1304.44 216.132   1 
   4   8  -2 75.0843 96.8402   1 
   4   8  -2-158.914 143.996   4 
   4   8  -1-47.1869 125.536   4 
   4   8  -1-75.8636 89.8069   1 
   4   8   0 154.447 123.519   4 
   4   8   1 202.478 122.264   4 
   4   8   2 7272.67 511.676   4 
   4   8   3 1101.27 219.836   4 
   4   8   4 132.252 117.440   4 
   4   8   5 76.2561 117.626   4 
   4   8   6 155.121 137.022   4 
   4   8   7-146.594 143.013   4 
   4   9 -12 184.299 139.435   4 
   4   9 -11 170.145 112.278   4 
   4   9 -11-126.403 155.844   1 
   4   9 -10-136.307 124.367   4 
   4   9 -10 198.276 182.813   1 
   4   9  -9 301.062 158.307   4 
   4   9  -9 188.641 162.097   1 
   4   9  -8 121.940 141.949   1 
   4   9  -8 209.010 115.445   4 
   4   9  -7 396.515 160.664   4 
   4   9  -7 358.173 173.730   1 
   4   9  -6 378.390 183.169   1 
   4   9  -6 146.826 114.157   4 
   4   9  -5 1528.63 258.095   4 
   4   9  -5 2014.91 306.401   1 
   4   9  -4-106.347 113.996   4 
   4   9  -4-77.6005 116.523   1 
   4   9  -3 75.2749 94.3890   1 
   4   9  -3-41.7519 106.396   4 
   4   9  -2 300.611 141.121   4 
   4   9  -2 171.429 114.647   1 
   4   9  -1 290.262 122.135   4 
   4   9  -1 567.818 160.956   1 
   4   9   0 42.1968 101.235   1 
   4   9   0 228.314 137.191   4 
   4   9   1 5133.39 437.772   4 
   4   9   2 2719.96 324.819   4 
   4   9   3 55.9621 99.6082   4 
   4   9   4 77.8632 108.332   4 
   4   9   5 407.754 175.996   4 
   4   9   6 354.705 171.086   4 
   4  10 -10 158.193 196.616   1 
   4  10  -9 938.653 234.148   4 
   4  10  -9 854.364 268.018   1 
   4  10  -8-210.581 168.454   1 
   4  10  -8-156.804 127.543   4 
   4  10  -7 114.752 127.292   1 
   4  10  -7-12.8573 82.1702   4 
   4  10  -6 152.989 116.428   4 
   4  10  -6 178.249 126.643   1 
   4  10  -5-55.1205 108.933   4 
   4  10  -5-136.430 126.461   1 
   4  10  -4 101.290 94.6812   1 
   4  10  -4-9.05405 94.6471   4 
   4  10  -3 119.127 117.901   4 
   4  10  -3-15.6400 96.8955   1 
   4  10  -2 116.306 115.748   4 
   4  10  -2-0.53614 117.038   1 
   4  10  -1 67.0397 105.948   4 
   4  10   0 247.969 122.869   4 
   4  10   1 46.4076 110.126   4 
   4  10   2 1008.18 212.758   4 
   4  10   3 741.979 199.219   4 
   4  10   4-157.535 124.942   4 
   4  10   5-141.558 123.350   4 
   4  11  -9 82.2176 159.058   1 
   4  11  -8 284.562 167.654   1 
   4  11  -7-94.4427 156.987   1 
   4  11  -6-297.112 167.791   1 
   4  11  -5-112.648 124.498   1 
   4  11  -4 274.486 158.484   1 
   4  11  -3 309.166 142.932   4 
   4  11  -3 257.872 147.370   1 
   4  11  -2 313.233 127.350   4 
   4  11  -1 165.925 108.365   4 
   4  11   0 315.326 146.753   4 
   4  11   1 97.6022 131.780   4 
   4  11   2 217.061 125.304   4 
   4  11   3-211.274 121.000   4 
   4  12  -7 47.0602 141.437   1 
   4  12  -6 494.634 199.278   1 
  -5  12   3 3664.68 525.600   1 
  -5  12   2 722.240 232.191   1 
  -5  12   1 1698.50 367.072   1 
  -5  12   0 2818.28 463.027   1 
  -5  12  -1 2746.55 453.613   1 
  -5  12  -2 289.079 218.743   1 
  -5  12  -3-333.449 181.326   1 
  -5  12  -4 189.017 188.486   1 
  -5  12  -5 525.038 235.371   1 
  -5  11   5 730.517 264.533   1 
  -5  11   4 3030.63 483.393   1 
  -5  11   3 1138.06 311.732   1 
  -5  11   2 357.530 194.503   1 
  -5  11   1 919.661 274.753   1 
  -5  11   0 658.948 251.720   1 
  -5  11  -1 560.834 238.544   1 
  -5  11  -2-72.8462 170.980   1 
  -5  11  -3-505.443 229.718   1 
  -5  11  -4-92.3638 131.870   1 
  -5  11  -5-225.394 172.016   1 
  -5  11  -6 284.953 187.328   1 
  -5  11  -7 126.534 129.618   1 
  -5  11  -8 133.705 141.338   1 
   5 -10  -9 379.867 174.057   3 
   5 -10  -8 1973.87 329.275   3 
  -5  10   7 1777.26 369.191   1 
   5 -10  -7 1614.08 286.068   3 
  -5  10   6 429.875 210.896   1 
   5 -10  -6 359.392 116.856   3 
  -5  10   5 581.585 215.896   1 
   5 -10  -5 316.143 137.074   3 
   5 -10  -4-248.926 113.455   3 
  -5  10   4 33.7542 143.463   1 
  -5  10   3 413.701 224.566   1 
  -5  10   2 559.811 224.505   1 
  -5  10   1-252.056 149.276   1 
  -5  10   0 349.845 160.395   1 
  -5  10  -1 1928.27 350.784   1 
  -5  10  -2 895.444 236.581   1 
  -5  10  -3 294.579 189.237   1 
  -5  10  -4 1702.91 339.073   1 
  -5  10  -5 262.784 178.805   1 
  -5  10  -6 2062.80 377.625   1 
  -5  10  -7 618.819 237.233   1 
  -5  10  -8 121.890 135.469   1 
  -5  10  -9 702.773 216.829   1 
   5  -9 -10 58.7139 128.879   3 
   5  -9  -9 983.423 246.114   3 
  -5   9   8 2812.89 444.912   1 
   5  -9  -8 1695.41 303.501   3 
  -5   9   7 857.336 260.710   1 
   5  -9  -7 650.430 200.498   3 
   5  -9  -7 744.963 176.178   2 
   5  -9  -6 894.744 195.464   2 
  -5   9   6 924.128 261.708   1 
   5  -9  -6 877.461 201.669   3 
   5  -9  -5 54.1142 77.5545   2 
  -5   9   5-11.2295 126.529   1 
   5  -9  -5 19.2852 77.5042   3 
   5  -9  -4 5.77223 71.5154   4 
   5  -9  -4 110.722 92.3069   3 
  -5   9   4-57.7004 180.438   1 
  -5   9   3 909.687 252.551   1 
   5  -9  -2 3064.13 242.056   4 
   5  -9  -2 3578.69 252.838   3 
  -5   9   2 3314.56 431.530   1 
  -5   9   1 1386.80 278.849   1 
   5  -9  -1 1108.59 125.020   4 
  -5   9   0 120.104 129.745   1 
   5  -9   0 19.1766 26.2926   4 
  -5   9  -1 196.235 135.793   1 
   5  -9   1-10.4434 19.1330   4 
  -5   9  -2 1006.82 240.578   1 
  -5   9  -3 1806.83 320.029   1 
  -5   9  -4 639.991 216.867   1 
  -5   9  -5 314.772 141.269   1 
  -5   9  -6 2024.18 346.985   1 
  -5   9  -7 33.3523 113.604   1 
  -5   9  -8 861.321 241.298   1 
  -5   9  -9 1426.49 313.959   1 
  -5   9 -10-285.870 157.743   1 
  -5   9 -11-78.2612 141.482   1 
   5  -8 -11 332.587 193.361   2 
   5  -8 -11 91.8657 131.401   3 
   5  -8 -10 612.238 196.516   2 
   5  -8 -10 581.909 223.481   3 
   5  -8  -9 983.763 249.156   2 
   5  -8  -9 945.480 245.242   3 
   5  -8  -8-19.5432 101.116   2 
   5  -8  -8 84.9333 102.999   3 
   5  -8  -7 28.1675 99.2307   2 
  -5   8   7 258.739 193.281   1 
   5  -8  -7-41.6525 152.669   3 
   5  -8  -6 446.803 153.919   2 
  -5   8   6 619.005 232.699   1 
   5  -8  -6 266.650 120.635   3 
   5  -8  -5 519.107 141.004   2 
  -5   8   5 423.905 158.932   1 
   5  -8  -5 669.143 163.104   3 
   5  -8  -4 1419.66 213.820   4 
   5  -8  -4 1554.03 218.077   3 
  -5   8   4 1183.38 262.623   1 
  -5   8   3 562.647 99.0028   2 
  -5   8   3 468.085 211.951   1 
   5  -8  -2-23.4510 65.8625   4 
  -5   8   2 11.6404 35.0702   2 
  -5   8   2-73.4995 130.247   1 
  -5   8   1 2974.17 385.778   1 
  -5   8   1 3258.02 165.012   2 
   5  -8  -1 2791.58 220.254   4 
  -5   8   0 7352.88 600.880   1 
  -5   8   0 6918.89 195.127   2 
   5  -8   0 6871.07 308.810   4 
   5  -8   1 1085.02 111.921   4 
  -5   8  -1 1229.55 243.147   1 
  -5   8  -2 9608.97 188.311   2 
  -5   8  -2 11039.3 718.262   1 
   5  -8   2 10686.2 319.090   4 
  -5   8  -2 9685.46 196.674   2 
  -5   8  -3 10018.5 248.991   2 
   5  -8   3 10068.0 316.629   4 
  -5   8  -3 10549.1 708.103   1 
  -5   8  -3 9876.00 273.702   2 
  -5   8  -4 2065.49 138.693   2 
   5  -8   4 2284.41 164.548   4 
  -5   8  -4 1821.42 302.550   1 
  -5   8  -5 912.942 113.936   2 
  -5   8  -5 895.063 228.628   1 
  -5   8  -6 2274.08 191.808   2 
  -5   8  -6 1891.13 319.768   1 
  -5   8  -7 4611.21 304.657   2 
  -5   8  -7 4610.42 491.608   1 
  -5   8  -8 632.714 226.534   1 
  -5   8  -9-120.740 129.494   1 
  -5   8 -10 2604.77 398.085   1 
  -5   8 -11 555.931 198.006   1 
  -5   8 -12-232.695 151.456   1 
   5  -7 -12-152.668 145.929   2 
   5  -7 -11 136.816 140.730   2 
   5  -7 -11 67.8051 126.890   3 
   5  -7 -10 416.682 200.826   2 
   5  -7 -10-204.110 164.874   3 
   5  -7  -9 120.454 138.825   2 
   5  -7  -9-253.851 148.669   3 
   5  -7  -8-78.3107 159.558   2 
   5  -7  -8 20.1373 123.172   3 
   5  -7  -7 192.209 129.802   2 
  -5   7   7 499.588 212.125   1 
   5  -7  -7 290.560 144.830   3 
   5  -7  -6 7917.19 543.649   3 
  -5   7   6 6785.98 584.909   1 
   5  -7  -6 7558.73 516.946   2 
  -5   7   5 2929.83 257.029   2 
   5  -7  -5 3240.56 325.071   3 
  -5   7   5 2902.70 384.523   1 
   5  -7  -5 2619.49 293.479   2 
  -5   7   4 1469.38 172.409   2 
   5  -7  -4 2021.92 253.261   4 
   5  -7  -4 1552.66 216.439   3 
  -5   7   4 1292.97 260.131   1 
  -5   7   3 26.1482 42.1036   2 
  -5   7   3 124.006 106.255   1 
  -5   7   2 548.795 91.1339   2 
  -5   7   2 483.306 189.354   1 
  -5   7   1 7615.16 570.798   1 
  -5   7   1 7166.93 292.266   2 
   5  -7  -1 7040.05 375.442   4 
  -5   7   0 7929.15 586.842   1 
   5  -7   0 7644.24 365.390   4 
  -5   7   0 8136.73 298.671   2 
  -5   7  -1 7989.40 578.298   1 
   5  -7   1 8118.59 351.900   4 
  -5   7  -1 8305.63 310.798   2 
  -5   7  -2-222.777 67.4465   2 
   5  -7   2 79.8546 50.8391   4 
  -5   7  -2-95.1229 120.782   1 
   5  -7   3 13045.9 421.872   4 
  -5   7  -3 13061.3 734.862   1 
  -5   7  -3 13340.7 449.215   2 
   5  -7   4 437.860 92.6080   4 
  -5   7  -4 707.768 128.172   4 
  -5   7  -4 682.564 185.058   1 
  -5   7  -4 660.239 100.819   2 
  -5   7  -5 6758.86 337.284   2 
  -5   7  -5 7474.09 568.951   1 
  -5   7  -5 6844.79 401.428   4 
  -5   7  -6 1773.45 195.256   2 
  -5   7  -6 1896.72 225.768   4 
  -5   7  -6 1842.63 297.796   1 
  -5   7  -7 411.139 153.327   1 
  -5   7  -7 453.478 123.493   2 
  -5   7  -8-66.4496 138.927   1 
  -5   7  -8 39.3590 79.4899   2 
  -5   7  -9 678.793 197.365   1 
  -5   7  -9 991.947 186.068   2 
  -5   7 -10 1749.45 307.428   1 
  -5   7 -10 2093.86 280.837   2 
  -5   7 -11 208.245 124.124   2 
  -5   7 -11-101.298 106.700   1 
  -5   7 -12-256.020 135.136   1 
   5  -6 -12-498.398 211.578   2 
   5  -6 -12 147.056 140.526   3 
   5  -6 -11 195.618 190.436   2 
   5  -6 -11 155.749 137.339   3 
   5  -6 -10 245.010 155.026   2 
   5  -6 -10 58.8653 122.151   3 
   5  -6  -9 17.9472 141.138   2 
   5  -6  -9-66.4513 139.237   3 
   5  -6  -8 33.3658 118.470   2 
   5  -6  -8 161.695 138.426   3 
   5  -6  -7 3569.89 388.050   3 
   5  -6  -7 3465.97 381.074   2 
  -5   6   6 11515.0 546.606   2 
   5  -6  -6 11780.3 659.490   3 
  -5   6   6 11419.9 722.270   1 
   5  -6  -6 11691.8 651.449   2 
   5  -6  -5 457.424 152.646   2 
  -5   6   5 520.832 118.927   2 
  -5   6   5 669.977 196.873   1 
   5  -6  -5 517.269 147.191   3 
  -5   6   4 1024.21 150.515   2 
   5  -6  -4 1124.34 197.805   4 
  -5   6   4 1092.84 233.192   1 
  -5   6   3 14492.4 510.087   2 
  -5   6   3 15446.5 789.023   1 
  -5   6   2 48094.0 1367.19   1 
  -5   6   2 49114.3 888.472   2 
  -5   6   1 35196.9 739.419   2 
  -5   6   1 35808.5 1151.41   1 
  -5   6   0 7981.65 550.098   1 
   5  -6   0 8562.01 411.891   4 
  -5   6   0 8727.74 372.812   2 
  -5   6  -1 66904.8 1563.86   1 
   5  -6   1 63984.3 1072.33   4 
   5  -6   1 68396.5 1470.87   1 
  -5   6  -1 63718.7 1025.72   2 
  -5   6  -2 39047.5 1172.64   1 
   5  -6   2 41032.6 1109.24   1 
  -5   6  -2 37984.4 821.890   2 
  -5   6  -3 8764.02 563.065   1 
  -5   6  -3 8834.23 446.771   4 
   5  -6   3 9357.42 522.240   1 
  -5   6  -4 7793.18 532.041   1 
  -5   6  -4 9364.46 477.044   4 
  -5   6  -5 14331.2 516.564   2 
  -5   6  -5 13580.7 715.706   1 
  -5   6  -5 14606.6 619.838   4 
   5  -6   6 7158.52 393.422   4 
  -5   6  -6 7008.11 392.217   2 
  -5   6  -6 6985.40 450.351   4 
  -5   6  -6 6461.95 507.920   1 
  -5   6  -6 6669.75 194.562   3 
  -5   6  -7 643.931 169.430   1 
  -5   6  -7 1012.47 171.123   2 
  -5   6  -7 756.038 93.2897   3 
  -5   6  -8 380.630 149.728   1 
  -5   6  -8 119.292 77.2697   2 
  -5   6  -9 1957.26 267.419   2 
  -5   6  -9 1731.25 283.946   1 
  -5   6 -10-166.400 114.792   1 
  -5   6 -10 99.9463 91.5067   2 
  -5   6 -11 1006.64 220.156   2 
  -5   6 -11 917.357 228.118   1 
  -5   6 -12 262.130 150.412   2 
  -5   6 -12 318.869 166.321   1 
   5  -5 -13 93.4369 181.616   2 
   5  -5 -12 335.312 210.454   2 
   5  -5 -12 232.657 193.208   3 
   5  -5 -11 68.9835 127.960   2 
   5  -5 -11-227.948 169.690   3 
   5  -5 -10 935.212 264.665   2 
   5  -5 -10 888.824 232.593   3 
   5  -5  -9 2353.24 354.202   2 
   5  -5  -9 2386.90 359.120   3 
   5  -5  -8 5696.65 510.742   3 
   5  -5  -8 5161.68 485.505   2 
   5  -5  -7 3017.79 352.149   3 
   5  -5  -7 2862.70 349.558   2 
   5  -5  -6 306.930 129.678   2 
  -5   5   6 229.615 96.4617   2 
   5  -5  -6 135.126 102.737   3 
  -5   5   6 176.962 132.201   1 
  -5   5   5 5161.28 347.490   2 
   5  -5  -5 5093.48 396.546   3 
  -5   5   5 5196.00 458.556   1 
   5  -5  -5 5271.94 420.281   2 
   5  -5  -4 6664.58 457.652   4 
  -5   5   4 5857.21 473.226   1 
  -5   5   4 5993.59 361.035   2 
  -5   5   3 37275.1 1146.32   1 
  -5   5   3 36312.4 845.383   2 
   5  -5  -2 20786.4 844.672   1 
  -5   5   2 19605.5 823.429   1 
  -5   5   2 19240.5 606.496   2 
  -5   5   1 137.610 74.7340   2 
  -5   5   1 106.264 109.678   1 
   5  -5  -1 32.8111 74.3207   1 
  -5   5   0 2935.81 314.669   1 
   5  -5   0 3143.70 310.270   1 
  -5   5   0 3021.84 242.519   2 
  -5   5  -1 3928.60 355.752   1 
   5  -5   1 4557.63 362.847   1 
  -5   5  -1 4409.57 299.410   2 
  -5   5  -2 4228.10 364.143   1 
  -5   5  -2 4250.84 315.241   4 
   5  -5   2 4569.63 351.415   1 
  -5   5  -3 2106.84 229.619   4 
   5  -5   3 2170.88 240.451   1 
  -5   5  -3 1826.99 245.554   1 
  -5   5  -3 1937.93 108.641   3 
  -5   5  -4 9239.99 537.990   1 
  -5   5  -4 10445.5 525.717   4 
   5  -5   5 3356.21 271.932   4 
  -5   5  -5 3536.52 341.813   1 
  -5   5  -5 3445.55 321.972   4 
  -5   5  -6 953.861 193.084   1 
   5  -5   6 1042.37 169.084   4 
  -5   5  -6 1100.27 192.437   4 
  -5   5  -6 1096.76 173.119   2 
  -5   5  -7 26.4139 111.494   1 
   5  -5   7 11.8782 83.8818   4 
  -5   5  -7-10.0469 74.4520   2 
  -5   5  -8 186.453 90.6136   1 
  -5   5  -8 10.2173 80.8488   2 
  -5   5  -9-20.8388 77.0774   1 
  -5   5  -9 1.33518 80.1881   2 
  -5   5 -10 3156.83 355.063   2 
  -5   5 -10 3133.10 372.204   1 
  -5   5 -11 1230.29 244.769   2 
  -5   5 -11 1176.33 239.023   1 
  -5   5 -12 394.856 178.222   2 
  -5   5 -13 328.936 166.922   2 
   5  -4 -13 210.192 211.800   2 
   5  -4 -12-113.879 139.612   2 
   5  -4 -12-96.8502 126.162   3 
   5  -4 -11 275.372 195.585   2 
   5  -4 -11 135.556 166.704   3 
   5  -4 -10 163.188 169.109   2 
   5  -4 -10-93.2081 121.785   3 
   5  -4  -9 134.536 142.250   2 
   5  -4  -9-89.4534 162.290   3 
   5  -4  -8 222.033 124.576   2 
   5  -4  -8 117.454 112.394   3 
   5  -4  -7 4044.51 415.809   3 
   5  -4  -7 3655.86 386.331   2 
   5  -4  -6 1048.83 223.616   2 
   5  -4  -6 619.779 151.320   3 
   5  -4  -5 509.864 151.057   2 
  -5   4   5 578.520 126.896   2 
   5  -4  -5 478.088 148.842   3 
  -5   4   5 571.667 161.444   1 
   5  -4  -4 29609.9 965.860   4 
  -5   4   4 27599.8 951.194   1 
  -5   4   4 30659.5 838.343   2 
   5  -4  -3 3784.97 354.737   1 
   5  -4  -3 4063.04 348.264   4 
  -5   4   3 3452.85 342.027   1 
  -5   4   3 3867.27 302.829   2 
   5  -4  -2 4617.82 380.819   1 
  -5   4   2 5175.56 396.609   1 
  -5   4   2 4476.00 318.201   2 
   5  -4  -1 1956.84 243.667   1 
  -5   4   1 1749.98 201.340   2 
  -5   4   1 2351.30 267.736   1 
   5  -4   0 9271.09 489.748   1 
  -5   4   0 9762.15 354.897   3 
  -5   4   0 8835.83 444.555   2 
  -5   4   0 8610.42 484.917   1 
  -5   4  -1 6286.13 412.946   1 
  -5   4  -1 6271.25 388.579   4 
   5  -4   1 5884.44 382.938   1 
  -5   4  -1 6440.16 279.943   3 
  -5   4  -2 98.9735 84.5044   1 
   5  -4   2 99.0210 65.6565   1 
  -5   4  -2 207.491 99.0484   4 
  -5   4  -3 2147.57 245.987   1 
  -5   4  -3 2404.71 259.412   4 
   5  -4   3 2335.54 223.148   1 
   5  -4   4 5947.12 365.153   4 
  -5   4  -4 5355.22 376.150   1 
  -5   4  -4 5866.05 415.996   4 
   5  -4   5 2937.61 269.858   4 
  -5   4  -5 2893.84 290.047   1 
  -5   4  -5 3240.91 322.162   4 
   5  -4   6 4938.81 355.390   4 
  -5   4  -6 4616.74 369.055   1 
   5  -4   7 17246.9 694.324   4 
  -5   4  -7 16722.3 693.738   2 
  -5   4  -7 16208.7 694.463   1 
   5  -4   8 3025.65 320.752   4 
  -5   4  -8 2920.33 316.354   2 
  -5   4  -8 2774.30 304.491   1 
  -5   4  -9 182.710 109.515   1 
  -5   4  -9 78.4804 103.700   2 
  -5   4 -10 656.997 188.252   2 
  -5   4 -10 544.927 163.339   1 
  -5   4 -11 784.677 217.894   2 
  -5   4 -11 613.053 189.878   1 
  -5   4 -12-51.4316 125.832   2 
   5  -3 -13 520.463 236.612   2 
   5  -3 -13 348.750 204.032   3 
   5  -3 -12 542.368 227.393   2 
   5  -3 -12 400.613 204.592   3 
   5  -3 -11 1683.93 358.939   2 
   5  -3 -11 1732.90 346.960   3 
   5  -3 -10 471.053 202.279   2 
   5  -3 -10 651.296 228.787   3 
   5  -3  -9 511.400 202.933   2 
   5  -3  -9 231.700 167.578   3 
   5  -3  -8-804.832 239.021   2 
   5  -3  -8 148.417 127.162   3 
   5  -3  -7 5860.91 489.276   3 
   5  -3  -7 5517.11 483.783   2 
   5  -3  -6 487.161 144.274   2 
   5  -3  -6 481.103 139.320   3 
   5  -3  -5 16001.5 747.378   2 
  -5   3   5 16719.4 659.021   2 
   5  -3  -4 191.944 90.1371   1 
  -5   3   4 405.441 113.902   2 
   5  -3  -4 364.276 132.315   4 
  -5   3   4 430.556 131.286   1 
   5  -3  -3 5530.57 406.272   1 
   5  -3  -3 5256.20 401.594   4 
  -5   3   3 5595.89 395.645   1 
  -5   3   3 5951.06 385.974   2 
   5  -3  -2 1171.25 180.855   1 
  -5   3   2 1222.35 157.232   3 
  -5   3   2 1539.35 204.194   1 
  -5   3   2 1324.46 184.178   2 
  -5   3   1 69.7850 64.1442   2 
   5  -3  -1 91.0903 71.0726   1 
  -5   3   1 73.0679 59.6180   3 
  -5   3   1 95.5769 84.8866   1 
   5  -3   0 56.9477 51.1708   1 
  -5   3   0 133.420 74.1647   4 
  -5   3   0 119.889 56.5437   3 
  -5   3   0 51.2257 67.4380   1 
  -5   3  -1 1557.24 207.793   4 
   5  -3   1 1586.54 181.387   1 
  -5   3  -1 1685.64 197.205   1 
  -5   3  -2 2662.92 242.537   1 
   5  -3   2 2649.50 261.322   4 
  -5   3  -2 2763.55 279.754   4 
   5  -3   2 2667.28 218.774   1 
  -5   3  -3 755.400 144.046   1 
   5  -3   3 467.839 124.137   4 
  -5   3  -3 664.893 147.604   4 
   5  -3   4 9948.42 493.999   4 
  -5   3  -4 9678.04 459.371   1 
  -5   3  -4 9816.59 548.732   4 
   5  -3   5 12370.2 561.390   4 
  -5   3  -5 12355.0 527.558   1 
   5  -3   6 10558.3 536.782   4 
  -5   3  -6 10235.4 493.840   1 
   5  -3   7 4887.45 386.233   4 
  -5   3  -7 4600.04 343.327   1 
   5  -3   8 349.220 132.636   4 
  -5   3  -8 467.537 123.905   1 
  -5   3  -8 356.093 139.381   2 
   5  -3   9 2221.06 301.843   4 
  -5   3  -9 2796.14 337.526   2 
  -5   3  -9 2084.06 254.508   1 
  -5   3 -10 752.990 201.988   2 
  -5   3 -10 525.886 148.287   1 
  -5   3 -11 132.783 114.393   2 
  -5   3 -12 396.346 183.100   2 
   5  -2 -13 891.442 277.064   2 
   5  -2 -13 607.815 258.827   3 
   5  -2 -12 852.511 257.039   2 
   5  -2 -12 938.996 254.377   3 
   5  -2 -11 367.695 191.896   2 
   5  -2 -11 277.174 174.229   3 
   5  -2 -10 745.571 224.534   2 
   5  -2 -10 711.251 231.371   3 
   5  -2  -9 14085.2 839.881   3 
   5  -2  -9 13772.6 829.830   2 
   5  -2  -8 19663.4 928.259   3 
   5  -2  -8 19318.6 943.819   2 
   5  -2  -7 10522.2 670.637   2 
   5  -2  -6 12444.2 694.499   2 
   5  -2  -5 43593.6 1243.40   4 
   5  -2  -5 42347.2 1222.13   2 
  -5   2   5 42241.3 1082.41   2 
   5  -2  -5 43180.6 1191.60   1 
   5  -2  -4 11760.0 628.879   4 
  -5   2   4 12405.4 551.661   3 
  -5   2   4 11915.3 572.969   2 
   5  -2  -4 12438.2 603.971   1 
   5  -2  -3 56.2898 76.1113   1 
  -5   2   3-86.3326 91.7246   2 
   5  -2  -3-27.9891 91.0892   4 
  -5   2   3-10.0973 70.4987   3 
   5  -2  -2 1649.13 203.673   1 
   5  -2  -2 1510.27 225.323   4 
  -5   2   2 1870.87 204.262   3 
  -5   2   2 1794.16 203.971   1 
  -5   2   2 1668.03 212.412   2 
  -5   2   1 348.369 119.716   2 
   5  -2  -1 219.446 92.6223   4 
   5  -2  -1 320.388 96.1235   1 
  -5   2   1 299.964 89.5172   3 
  -5   2   1 293.428 103.478   1 
   5  -2   0-82.2992 94.2778   4 
  -5   2   0-101.514 106.754   4 
  -5   2   0 12.7954 66.1819   1 
   5  -2   0 34.9852 64.7512   1 
   5  -2   1 2996.35 285.950   4 
  -5   2  -1 3066.43 302.650   4 
   5  -2   1 2601.64 204.733   1 
  -5   2  -1 2679.12 216.408   1 
  -5   2  -2 45.0818 51.1513   1 
   5  -2   2 60.3270 43.1678   1 
   5  -2   2 99.1277 101.803   4 
  -5   2  -2 102.026 95.9492   4 
  -5   2  -3 2021.51 186.111   1 
   5  -2   3 2058.43 237.897   4 
  -5   2  -3 1956.57 253.304   4 
  -5   2  -4 27190.0 673.733   1 
   5  -2   4 28077.2 851.023   4 
  -5   2  -4 27734.0 951.116   4 
   5  -2   5 8269.29 473.986   4 
  -5   2  -5 7308.45 360.868   1 
  -5   2  -6 1715.04 181.154   1 
   5  -2   6 1663.48 236.759   4 
   5  -2   7 937.018 194.936   4 
  -5   2  -7 893.908 141.211   1 
   5  -2   8 357.128 146.412   4 
  -5   2  -8 268.472 91.4584   1 
  -5   2  -8 480.334 176.774   2 
   5  -2   9 8458.05 569.097   4 
  -5   2  -9 7479.07 551.039   2 
  -5   2  -9 7550.26 441.159   1 
  -5   2 -10 37.1896 112.238   2 
  -5   2 -11 4005.04 450.825   2 
  -5   2 -12 1144.33 282.733   2 
   5  -1 -13-94.5192 214.678   2 
   5  -1 -13 534.334 225.747   3 
   5  -1 -12 383.728 209.181   2 
   5  -1 -12 404.280 209.089   3 
   5  -1 -11 200.386 155.727   2 
   5  -1 -11 375.310 226.383   3 
   5  -1 -10 85.8379 141.385   2 
   5  -1 -10 291.619 200.283   3 
   5  -1  -9 312.421 210.356   2 
   5  -1  -8 1938.61 333.405   2 
   5  -1  -7 203.439 159.051   2 
   5  -1  -6 4065.20 414.111   2 
   5  -1  -5 2424.46 331.331   4 
  -5   1   5 2288.89 262.030   3 
   5  -1  -5 2456.54 284.815   1 
  -5   1   5 2333.90 278.042   2 
   5  -1  -4 9861.46 588.377   4 
  -5   1   4 9847.90 512.618   3 
  -5   1   4 8808.32 509.150   2 
   5  -1  -4 9376.84 506.369   1 
   5  -1  -3 3407.78 344.864   4 
  -5   1   3 3509.83 304.840   3 
  -5   1   3 3062.67 299.803   2 
   5  -1  -3 3538.45 295.395   1 
   5  -1  -2 4103.92 296.967   1 
   5  -1  -2 4301.65 370.161   4 
  -5   1   2 4126.76 324.970   3 
  -5   1   2 4382.23 356.925   2 
   5  -1  -1 2910.52 231.093   1 
   5  -1  -1 2629.91 287.938   4 
  -5   1   1 2516.31 275.388   4 
  -5   1   1 2854.30 291.503   2 
   5  -1   0 80762.4 1091.14   1 
   5  -1   0 85136.3 1548.87   4 
  -5   1   0 85754.8 1583.06   4 
  -5   1   0 82078.5 1045.01   1 
   5  -1   1 9061.44 502.433   4 
  -5   1  -1 9425.21 535.464   4 
   5  -1   1 9904.69 333.584   1 
  -5   1  -1 9787.09 335.445   1 
   5  -1   2 33761.3 953.035   4 
  -5   1  -2 32992.5 1014.06   4 
  -5   1  -2 35010.6 590.569   1 
   5  -1   3 14672.7 638.428   4 
  -5   1  -3 15146.5 702.745   4 
  -5   1  -3 14786.8 376.521   1 
  -5   1  -4 6191.78 253.978   1 
   5  -1   4 6612.39 433.924   4 
  -5   1  -5 1210.94 123.944   1 
   5  -1   5 1523.24 219.698   4 
   5  -1   6 94.7423 106.232   4 
  -5   1  -6 210.930 63.1126   1 
  -5   1  -7 171.661 69.2097   1 
   5  -1   7-46.1358 111.071   4 
   5  -1   8 1658.21 269.076   4 
  -5   1  -8 1612.81 178.264   1 
   5  -1   9 68.3329 146.000   4 
  -5   1  -9 93.0936 135.377   2 
  -5   1 -10 234.136 144.454   2 
  -5   1 -11 364.967 194.615   2 
   5   0 -13-44.8897 170.794   2 
   5   0 -12 155.874 134.987   2 
   5   0 -11 933.179 266.232   2 
   5   0 -10 1156.76 287.919   2 
   5   0  -9 3832.12 467.250   2 
   5   0  -8 4980.85 498.936   2 
   5   0  -7 1767.39 306.205   2 
   5   0  -6 6732.71 525.082   4 
   5   0  -6 6329.37 524.843   2 
   5   0  -6 6710.47 468.140   1 
   5   0  -5 22672.0 920.965   4 
  -5   0   5 22412.0 825.068   3 
   5   0  -5 22063.8 797.971   1 
   5   0  -4 25468.4 948.131   4 
  -5   0   4 24512.4 851.547   3 
   5   0  -4 25608.4 799.327   1 
  -5   0   4 25401.3 889.762   2 
  -5   0   3 3742.36 326.608   3 
  -5   0   3 3356.76 328.829   2 
   5   0  -3 3638.36 286.649   1 
  -5   0   2 15511.5 694.653   2 
   5   0  -2 14669.9 517.961   1 
   5   0  -1 61801.4 961.018   1 
  -5   0   1 63508.2 1376.17   4 
   5   0   0 14944.7 401.521   1 
  -5   0   0 15003.7 680.893   4 
   5   0   1 353.958 51.3272   1 
   5   0   1 393.764 131.120   4 
  -5   0  -1 248.821 102.435   4 
   5   0   2 5278.86 404.429   4 
  -5   0  -2 6228.75 453.519   4 
   5   0   3 15590.5 682.697   4 
   5   0   4 891.142 185.780   4 
   5   0   5 3244.32 322.748   4 
   5   0   6 56.2117 129.315   4 
  -5   0  -6 202.712 42.4216   1 
  -5   0  -6 175.781 40.4471   1 
   5   0   7 8077.68 537.753   4 
  -5   0  -7 6872.21 269.889   1 
   5   0   8 5012.72 448.311   4 
   5   0   9 1876.83 304.983   4 
  -5   0  -9 1908.92 307.202   2 
  -5   0 -10-48.8136 121.879   2 
  -5   0 -11-125.683 141.597   2 
   5   1 -13 56.9259 176.753   2 
   5   1 -12-419.272 224.408   2 
   5   1 -11 216.449 191.373   2 
   5   1 -10 2562.32 400.784   2 
   5   1  -9 5732.07 562.055   2 
   5   1  -8 1105.31 258.096   2 
   5   1  -7 3401.43 393.206   4 
   5   1  -7 2803.00 377.039   2 
   5   1  -6 17026.0 832.099   4 
   5   1  -6 18361.1 748.855   1 
   5   1  -5 14103.6 738.783   4 
   5   1  -5 15361.5 643.008   1 
   5   1  -4 13681.8 707.590   4 
  -5  -1   4 14367.5 675.580   3 
   5   1  -4 13587.7 561.830   1 
   5   1  -3 5826.92 455.997   4 
   5   1  -3 6507.54 361.030   1 
  -5  -1   3 6118.96 452.431   2 
  -5  -1   2 17067.1 746.346   2 
   5   1  -2 15853.5 510.237   1 
  -5  -1   1 38975.1 1111.90   4 
   5   1  -1 40562.8 702.364   1 
  -5  -1   0 42.0019 99.1669   4 
   5   1   0 39.3706 30.4160   1 
   5   1   1 5846.14 428.664   4 
   5   1   2 3332.26 335.540   4 
   5   1   3 187.329 120.562   4 
   5   1   4 164.921 147.210   4 
   5   1   5 5488.96 434.739   4 
   5   1   6 135.220 126.276   4 
   5   1   7 240.248 159.320   4 
   5   1   8 2276.99 328.234   4 
   5   1   9 1558.15 286.037   4 
  -5  -1  -9 1417.86 278.289   2 
   5   1  10 236.576 178.743   4 
  -5  -1 -10 298.942 127.912   2 
   5   2 -13 59.6963 160.701   2 
   5   2 -12-436.205 210.551   2 
   5   2 -11 493.292 217.648   2 
   5   2 -10 887.792 270.917   2 
   5   2  -9 581.418 210.104   2 
   5   2  -8 5453.99 530.562   2 
   5   2  -7-38.7876 154.888   4 
   5   2  -6 4436.69 449.183   4 
   5   2  -5 7009.62 532.161   4 
   5   2  -4 477.651 149.990   4 
   5   2  -3 94.6843 112.075   4 
   5   2  -3 202.633 77.2168   1 
   5   2  -2 3054.67 341.598   4 
   5   2  -2 3329.97 227.010   1 
   5   2  -1 1298.52 232.174   4 
   5   2  -1 540.074 82.0591   1 
   5   2   0 907.102 187.267   4 
   5   2   1 698.698 156.871   4 
   5   2   2 1399.29 229.500   4 
   5   2   3 897.994 196.984   4 
   5   2   4 23.0242 128.533   4 
   5   2   5 3871.67 373.494   4 
   5   2   6 11320.1 645.675   4 
   5   2   7-271.781 139.236   4 
   5   2   8 971.605 239.556   4 
   5   2   9 91.6912 136.879   4 
  -5  -2  -9-35.1609 126.926   2 
   5   2  10 168.016 169.180   4 
  -5  -2 -10 780.394 251.654   2 
   5   3 -13 14.6504 156.369   2 
   5   3 -12 35.2119 132.980   2 
   5   3 -11-238.731 183.803   2 
   5   3 -10 3658.80 478.392   2 
   5   3  -9 281.841 165.127   2 
   5   3  -9 706.500 221.367   4 
   5   3  -8 141.850 135.302   4 
   5   3  -7 9760.62 676.178   4 
   5   3  -6 4608.90 458.639   4 
   5   3  -5 1976.94 315.126   4 
   5   3  -4 739.271 204.676   4 
   5   3  -3 85.4014 133.232   4 
   5   3  -2 283.488 148.795   4 
   5   3  -1-68.2706 133.470   4 
   5   3  -1 48.1051 40.9080   1 
   5   3   0 3164.49 348.109   4 
   5   3   1 1121.34 212.129   4 
   5   3   2 2682.74 318.846   4 
   5   3   3 308.887 148.965   4 
   5   3   4 667.538 185.067   4 
   5   3   5 22.3300 103.057   4 
   5   3   6 183.474 124.130   4 
   5   3   7 63.3335 121.535   4 
   5   3   8 6.29938 96.0974   4 
   5   3   9 314.649 134.459   4 
  -5  -3  -9 331.956 168.057   2 
   5   4 -13 798.972 275.671   2 
   5   4 -12 915.868 280.595   2 
   5   4 -11 113.003 156.126   2 
   5   4 -10 2314.94 388.934   4 
   5   4 -10 1271.55 298.022   2 
   5   4  -9 39.6245 133.167   4 
   5   4  -8 2705.44 382.388   4 
   5   4  -7 1332.64 287.181   4 
   5   4  -6 3018.90 380.068   4 
   5   4  -5 4657.91 456.673   4 
   5   4  -4 2487.93 338.666   4 
   5   4  -3 11238.9 666.133   4 
   5   4  -2 12506.9 691.175   4 
   5   4  -2 12862.5 435.291   1 
   5   4  -1 344.736 177.366   4 
   5   4  -1 707.375 96.0122   1 
   5   4   0 224.368 145.265   4 
   5   4   0 179.628 35.2975   1 
   5   4   0 207.961 38.0886   1 
   5   4   1 23.7148 124.222   4 
   5   4   2 252.114 153.826   4 
   5   4   3 957.612 203.476   4 
   5   4   4 1788.40 294.033   4 
   5   4   5 669.716 185.025   4 
   5   4   6 433.350 162.191   4 
   5   4   7 1849.44 308.592   4 
   5   4   8 126.283 129.716   4 
   5   4   9 571.569 186.628   4 
  -5  -4  -9 539.302 202.300   2 
   5   5 -12 114.534 146.919   4 
   5   5 -12 282.424 208.965   2 
   5   5 -11 795.370 266.095   4 
   5   5 -10 2253.55 379.721   4 
   5   5  -9 17.7016 173.247   4 
   5   5  -8 144.919 141.277   4 
   5   5  -7 2506.98 364.844   4 
   5   5  -6 327.325 159.945   4 
   5   5  -5 1217.85 262.955   4 
   5   5  -4 358.516 164.093   4 
   5   5  -3 2861.29 350.023   4 
   5   5  -2 1194.46 151.396   1 
   5   5  -2 1276.45 247.378   4 
   5   5  -1 1729.38 160.094   1 
   5   5  -1 1673.40 262.934   4 
   5   5   0 21.1247 26.3467   1 
   5   5   0-91.2628 135.620   4 
   5   5   1 1697.91 269.343   4 
   5   5   2 301.914 128.623   4 
   5   5   3 34.3710 123.768   4 
   5   5   4 1771.85 293.197   4 
   5   5   5 44.8930 102.634   4 
   5   5   6 1780.95 289.602   4 
   5   5   7 540.660 186.831   4 
   5   5   8 295.573 151.811   4 
   5   6 -12 261.933 211.689   4 
   5   6 -11 77.6181 153.730   4 
   5   6 -10 548.300 236.654   4 
   5   6  -9 755.026 233.787   4 
   5   6  -8 665.906 219.370   4 
   5   6  -7 175.595 103.203   4 
   5   6  -6 2039.68 323.007   4 
   5   6  -5 1510.31 274.499   4 
   5   6  -4 225.550 123.914   4 
   5   6  -4 681.963 157.491   1 
   5   6  -3-122.771 130.244   4 
   5   6  -2 84.5094 102.358   4 
   5   6  -2 128.350 65.3739   1 
   5   6  -1-55.1512 148.213   4 
   5   6  -1 181.752 63.0303   1 
   5   6   0 54.8244 42.7592   1 
   5   6   0 25.0037 105.369   4 
   5   6   1 27.7064 123.486   4 
   5   6   2 189.236 135.303   4 
   5   6   3 1446.88 257.381   4 
   5   6   4 28.2894 139.714   4 
   5   6   5 271.678 137.643   4 
   5   6   6 322.703 180.579   4 
   5   6   7-267.527 164.202   4 
   5   7 -12-288.500 178.375   4 
   5   7 -11 801.420 253.800   4 
   5   7 -10 337.756 177.295   4 
   5   7  -9 51.9930 146.090   4 
   5   7  -8-4.20105 125.814   4 
   5   7  -7 578.245 184.629   4 
   5   7  -6 43.5254 91.4895   1 
   5   7  -6-72.9823 106.757   4 
   5   7  -5 1671.62 256.056   1 
   5   7  -5 1732.25 311.182   4 
   5   7  -4 1965.18 254.086   1 
   5   7  -4 1731.95 295.063   4 
   5   7  -3 1057.97 241.993   4 
   5   7  -3 1069.29 189.318   1 
   5   7  -2-24.0226 122.754   4 
   5   7  -1 256.435 140.148   4 
   5   7  -1 144.031 70.9202   1 
   5   7   0 333.388 167.288   4 
   5   7   1 176.285 124.589   4 
   5   7   2-32.8713 104.466   4 
   5   7   3 575.484 183.914   4 
   5   7   4 134.670 111.028   4 
   5   7   5 1581.13 283.211   4 
   5   7   6 225.264 130.667   4 
   5   8 -12 3.63572 73.5701   4 
   5   8 -11 226.906 147.454   4 
   5   8 -10 204.233 147.400   4 
   5   8  -9 281.756 158.338   4 
   5   8  -8 485.398 170.609   1 
   5   8  -8 305.182 186.815   4 
   5   8  -7-124.418 124.100   4 
   5   8  -7 268.918 155.592   1 
   5   8  -6 1253.46 271.342   4 
   5   8  -6 1286.23 254.277   1 
   5   8  -5 325.355 140.029   1 
   5   8  -5 764.891 225.289   4 
   5   8  -4 1487.56 280.103   4 
   5   8  -4 1519.52 246.751   1 
   5   8  -3 44.0094 78.8344   1 
   5   8  -3-100.182 99.1598   4 
   5   8  -2 280.683 147.590   4 
   5   8  -2 386.366 127.654   1 
   5   8  -1 579.161 175.464   4 
   5   8   0 390.411 144.879   4 
   5   8   1 1364.34 262.666   4 
   5   8   2 2520.94 338.709   4 
   5   8   3 334.171 159.409   4 
   5   8   4 341.141 163.175   4 
   5   8   5 48.7748 117.707   4 
   5   9 -11-317.251 161.146   4 
   5   9 -10 147.286 154.598   1 
   5   9 -10-10.5081 114.185   4 
   5   9  -9 402.544 182.185   4 
   5   9  -9-82.1726 118.401   1 
   5   9  -8 271.109 159.964   1 
   5   9  -8-230.307 151.584   4 
   5   9  -7-123.928 110.769   4 
   5   9  -7 220.138 161.285   1 
   5   9  -6 225.621 137.105   1 
   5   9  -6 268.547 128.778   4 
   5   9  -5 672.312 205.911   4 
   5   9  -5-20.3931 119.975   1 
   5   9  -4 137.456 112.732   1 
   5   9  -4 96.0694 107.679   4 
   5   9  -3-376.822 158.233   4 
   5   9  -2 829.615 214.059   4 
   5   9  -1 331.797 149.715   4 
   5   9   0 410.235 173.235   4 
   5   9   1 1462.80 269.267   4 
   5   9   2 309.841 151.377   4 
   5   9   3 334.824 158.382   4 
   5   9   4-7.93929 97.2265   4 
   5  10  -9 127.953 134.393   4 
   5  10  -9-18.6303 125.213   1 
   5  10  -8 104.921 134.746   1 
   5  10  -8 338.330 160.112   4 
   5  10  -7 545.420 177.876   4 
   5  10  -7 734.292 228.731   1 
   5  10  -6-16.8951 87.3374   4 
   5  10  -6-19.1402 107.640   1 
   5  10  -5 100.218 106.840   4 
   5  10  -4 127.021 123.959   4 
   5  10  -3 79.7460 102.930   4 
   5  10  -2 39.8025 104.403   4 
   5  10  -1 332.236 165.009   4 
   5  10   0 19.3716 109.292   4 
   5  10   1 239.708 142.535   4 
   5  10   2 358.026 175.124   4 
   5  10   3 413.364 166.187   4 
   5  11  -3 454.794 176.989   4 
   5  11  -2 67.2602 110.129   4 
   5  11  -1 60.9772 105.886   4 
   5  11   0 19.2728 84.4401   4 
  -6  12  -1 121.927 142.454   1 
  -6  12  -2 861.055 278.751   1 
  -6  11   4-169.669 161.085   1 
  -6  11   3 214.040 186.729   1 
  -6  11   2 1794.46 373.212   1 
  -6  11   1 2506.21 414.281   1 
  -6  11   0 251.523 157.521   1 
  -6  11  -1-190.666 160.556   1 
  -6  11  -2 3522.52 502.442   1 
  -6  11  -3 3009.77 476.058   1 
  -6  11  -4 2946.74 459.894   1 
  -6  11  -5 420.959 208.702   1 
  -6  11  -6-220.231 179.902   1 
  -6  11  -7 52.8900 173.185   1 
  -6  10   6-66.1852 123.192   1 
  -6  10   5 452.347 212.538   1 
  -6  10   4 1191.54 300.398   1 
  -6  10   3 1964.30 384.680   1 
  -6  10   2 8414.93 732.024   1 
  -6  10   1 4142.95 513.706   1 
  -6  10   0 1583.67 331.223   1 
  -6  10  -1 10142.4 799.220   1 
  -6  10  -2 6415.66 631.840   1 
  -6  10  -3 165.001 105.321   1 
  -6  10  -4 510.191 198.424   1 
  -6  10  -5 625.436 235.676   1 
  -6  10  -6 6541.37 654.175   1 
  -6  10  -7 294.980 165.391   1 
  -6  10  -8-370.653 186.808   1 
  -6  10  -9 1344.05 327.154   1 
   6  -9  -9 122.646 117.061   3 
   6  -9  -8-352.586 164.634   3 
  -6   9   7 360.314 185.946   1 
   6  -9  -7-198.950 129.592   3 
   6  -9  -6 772.208 192.677   4 
  -6   9   6 518.409 187.179   1 
   6  -9  -6 749.999 183.523   3 
   6  -9  -5 4821.22 427.693   4 
   6  -9  -5 4608.18 409.365   3 
  -6   9   5 4873.84 553.326   1 
   6  -9  -4 1304.84 226.108   4 
  -6   9   4 889.369 257.676   1 
   6  -9  -3 5320.43 387.965   4 
  -6   9   3 5602.61 580.952   1 
  -6   9   2 3088.09 437.803   1 
   6  -9  -1 21.2280 34.5258   4 
  -6   9   1-70.8260 117.766   1 
  -6   9   0 3584.98 460.726   1 
  -6   9  -1 5352.37 563.351   1 
  -6   9  -2 12.9260 166.806   1 
  -6   9  -3-172.550 168.392   1 
  -6   9  -4 77.2924 104.137   1 
  -6   9  -5 490.957 198.443   1 
  -6   9  -6 173.585 136.898   1 
  -6   9  -7 729.946 233.194   1 
  -6   9  -8-80.6002 110.727   1 
  -6   9  -9 187.486 141.420   1 
  -6   9 -10 335.195 175.155   1 
   6  -8 -11 1268.21 352.336   3 
   6  -8 -10 494.328 216.460   2 
   6  -8 -10 766.179 260.494   3 
   6  -8  -9 850.411 257.654   2 
   6  -8  -9 59.6851 125.288   3 
   6  -8  -8 2185.80 333.033   2 
   6  -8  -8 1312.93 268.892   3 
   6  -8  -7 3582.12 409.675   3 
  -6   8   7 4091.27 506.302   1 
   6  -8  -7 3673.97 400.942   2 
   6  -8  -6 3929.51 411.991   4 
   6  -8  -6 4196.62 416.887   3 
  -6   8   6 3772.96 483.931   1 
   6  -8  -5 67.4166 105.419   4 
  -6   8   5-33.0069 155.741   1 
   6  -8  -5-50.2111 97.0989   3 
   6  -8  -4-144.291 116.776   4 
  -6   8   4-224.465 194.770   1 
   6  -8  -3 6436.95 442.222   4 
  -6   8   3 6126.48 580.024   1 
  -6   8   2 1436.99 283.817   1 
  -6   8   1 98.6558 116.445   1 
  -6   8   0 541.988 194.276   1 
  -6   8  -1 211.086 145.148   1 
  -6   8  -2 16.6507 92.7399   1 
  -6   8  -3-27.9510 131.802   1 
  -6   8  -4 2471.32 357.980   1 
  -6   8  -5 217.741 91.3999   1 
  -6   8  -6 2977.13 404.449   1 
  -6   8  -7 2138.45 344.287   1 
  -6   8  -8-205.154 136.293   1 
  -6   8  -9 178.627 127.306   1 
  -6   8 -10 1494.20 306.627   1 
   6  -7 -11 251.804 131.484   2 
   6  -7 -11-36.5402 162.121   3 
   6  -7 -10 58.7748 127.667   2 
   6  -7 -10-79.6664 148.908   3 
   6  -7  -9 1592.58 313.139   2 
   6  -7  -9 1287.04 291.677   3 
   6  -7  -8 4069.23 467.584   3 
   6  -7  -8 5577.96 536.138   2 
   6  -7  -7 5740.60 509.525   3 
   6  -7  -7 6251.13 531.106   2 
   6  -7  -6 3417.58 382.574   3 
  -6   7   6 3567.81 452.922   1 
   6  -7  -6 3172.72 365.474   2 
   6  -7  -5 343.445 158.019   4 
  -6   7   5 13.0166 139.260   1 
  -6   7   4 4227.05 313.103   2 
   6  -7  -4 4022.41 386.988   4 
  -6   7   4 4131.19 462.648   1 
  -6   7   3 76.6776 61.8330   2 
   6  -7  -3-35.2212 99.2200   4 
  -6   7   3 55.7559 106.251   1 
   6  -7  -2 3832.30 337.839   4 
  -6   7   2 3047.28 391.774   1 
  -6   7   2 3338.99 251.354   2 
  -6   7   1 1777.81 293.616   1 
  -6   7   1 1809.11 182.274   2 
  -6   7   0 2318.53 329.084   1 
  -6   7   0 2770.96 225.411   2 
  -6   7  -1 296.700 140.730   1 
  -6   7  -1 252.840 79.6852   2 
  -6   7  -2-27.1309 66.2466   2 
  -6   7  -2 5.68197 111.540   1 
  -6   7  -3 1308.33 258.627   1 
   6  -7   4 1286.41 167.488   4 
  -6   7  -4 934.761 219.140   1 
   6  -7   5 831.663 143.864   4 
  -6   7  -5 605.645 182.067   1 
  -6   7  -5 1188.86 161.273   2 
   6  -7   6 1375.32 190.408   4 
  -6   7  -6 1292.83 180.049   2 
  -6   7  -6 1654.84 282.503   1 
   6  -7   7 161.463 89.9154   4 
  -6   7  -7 314.874 105.881   2 
  -6   7  -7 181.974 111.281   1 
  -6   7  -8 1044.11 192.573   2 
  -6   7  -8 772.787 209.071   1 
  -6   7  -9 1180.65 257.930   1 
  -6   7 -10 756.958 235.215   1 
   6  -6 -12-211.635 210.495   2 
   6  -6 -11 140.024 162.997   2 
   6  -6 -11-312.063 174.506   3 
   6  -6 -10 1670.80 332.824   2 
   6  -6 -10 1575.54 324.527   3 
   6  -6  -9 791.712 231.974   2 
   6  -6  -9 587.938 208.957   3 
   6  -6  -8 350.921 183.201   2 
   6  -6  -8 689.087 217.648   3 
   6  -6  -7 1837.05 301.234   2 
   6  -6  -7 1969.58 321.541   3 
   6  -6  -6 48.9171 129.397   3 
  -6   6   6 414.550 166.748   1 
   6  -6  -6 142.355 116.948   2 
  -6   6   5 2818.32 271.429   2 
   6  -6  -5 3778.34 391.068   4 
  -6   6   5 3160.49 396.707   1 
  -6   6   4 1198.90 177.247   2 
   6  -6  -4 1347.18 228.760   4 
  -6   6   4 1397.21 265.130   1 
  -6   6   3 1193.23 167.549   2 
   6  -6  -3 1342.13 223.639   4 
  -6   6   3 1035.48 235.743   1 
  -6   6   2 89.2124 53.6324   2 
   6  -6  -2 254.166 98.5854   4 
  -6   6   2-25.4708 101.881   1 
   6  -6  -1 6870.35 447.047   4 
  -6   6   1 7000.87 396.329   2 
  -6   6   1 7285.99 549.535   1 
   6  -6   0 17113.1 663.196   4 
  -6   6   0 17118.4 620.885   2 
  -6   6   0 16459.7 797.043   1 
  -6   6  -1 5141.95 450.364   1 
   6  -6   1 5869.00 383.650   4 
  -6   6  -1 5599.26 362.235   2 
  -6   6  -2 4272.18 409.547   1 
   6  -6   2 4055.85 309.057   4 
  -6   6  -2 4032.86 317.568   2 
  -6   6  -3 6609.24 505.425   1 
   6  -6   3 6528.89 388.730   4 
  -6   6  -3 6391.64 427.746   4 
   6  -6   4-75.1077 87.2347   4 
  -6   6  -4-103.235 134.814   1 
  -6   6  -4 263.092 103.011   4 
   6  -6   5 249.139 99.1565   4 
  -6   6  -5 211.226 113.158   1 
   6  -6   6 2051.19 236.426   4 
  -6   6  -6 2454.45 261.053   2 
  -6   6  -6 2725.27 341.767   1 
   6  -6   7 2452.22 272.857   4 
  -6   6  -7 2201.79 262.544   2 
  -6   6  -7 2539.08 328.488   1 
  -6   6  -8 1585.73 233.167   2 
  -6   6  -8 1529.75 268.809   1 
  -6   6  -9 241.333 125.693   1 
  -6   6  -9 113.834 97.2466   2 
  -6   6 -10 1049.16 218.998   2 
  -6   6 -11 512.034 186.044   2 
   6  -5 -12 259.893 214.145   2 
   6  -5 -12 99.1428 145.218   3 
   6  -5 -11 312.723 195.962   2 
   6  -5 -11 65.8191 141.818   3 
   6  -5 -10 838.499 268.798   2 
   6  -5 -10 418.761 209.689   3 
   6  -5  -9 511.608 208.739   2 
   6  -5  -9 15.3078 162.089   3 
   6  -5  -8-129.574 161.116   2 
   6  -5  -8-29.5661 114.205   3 
   6  -5  -7-71.0648 135.755   2 
   6  -5  -7-12.9668 116.902   3 
   6  -5  -6 1124.64 253.711   4 
   6  -5  -6 610.945 193.125   2 
  -6   5   5 1392.88 260.687   1 
   6  -5  -5 1478.87 256.490   4 
   6  -5  -4 4653.50 419.047   4 
  -6   5   4 4409.28 429.955   1 
  -6   5   4 4939.43 361.058   2 
  -6   5   3 166.898 69.2708   2 
   6  -5  -3 297.833 126.978   4 
  -6   5   3 220.889 132.442   1 
   6  -5  -2 3193.16 326.295   4 
  -6   5   2 3173.57 347.820   1 
  -6   5   2 3012.78 275.018   2 
   6  -5  -1 13140.3 624.067   4 
  -6   5   1 13202.0 586.716   2 
  -6   5   1 12726.7 673.434   1 
   6  -5   0 11075.0 560.857   4 
   6  -5   0 11749.4 610.430   1 
  -6   5   0 10758.8 534.019   2 
  -6   5   0 12107.0 642.039   1 
   6  -5   1 6636.73 423.411   4 
   6  -5   1 7425.25 475.417   1 
  -6   5  -1 7133.01 296.864   3 
  -6   5  -1 6475.14 422.219   2 
  -6   5  -1 6828.46 478.055   1 
  -6   5  -2 109.508 96.2235   1 
   6  -5   2 118.532 89.8198   4 
  -6   5  -2 258.001 107.131   4 
   6  -5   2 188.752 90.3607   1 
  -6   5  -2 197.823 56.5388   3 
   6  -5   3 37.3934 55.5430   1 
  -6   5  -3 31.8876 94.4605   1 
   6  -5   3-9.35072 81.5809   4 
  -6   5  -3-188.007 99.3030   4 
  -6   5  -3-0.15151 36.6192   3 
   6  -5   4 1144.65 179.899   4 
  -6   5  -4 915.447 189.825   1 
  -6   5  -4 870.124 182.194   4 
   6  -5   5 457.187 119.601   4 
  -6   5  -5 352.160 122.296   1 
   6  -5   6 184.291 101.126   4 
  -6   5  -6 29.3716 95.2000   1 
   6  -5   7 1224.37 207.258   4 
  -6   5  -7 1446.55 224.288   2 
  -6   5  -7 1431.16 229.555   1 
   6  -5   8 862.944 194.715   4 
  -6   5  -8 1164.49 213.641   2 
  -6   5  -8 962.841 212.440   1 
  -6   5  -9 766.229 199.668   1 
  -6   5  -9 480.294 156.584   2 
  -6   5 -10 688.851 195.352   2 
  -6   5 -11 484.550 176.218   2 
   6  -4 -12 10.2960 142.977   2 
   6  -4 -12 49.7550 167.856   3 
   6  -4 -11 323.610 214.521   2 
   6  -4 -11-32.7483 123.351   3 
   6  -4 -10 411.300 187.118   2 
   6  -4 -10 630.823 227.211   3 
   6  -4  -9 324.140 191.843   2 
   6  -4  -9-31.8192 154.407   3 
   6  -4  -8 237.046 182.040   2 
   6  -4  -7 2385.55 355.535   2 
   6  -4  -6 6214.20 529.270   4 
   6  -4  -5 372.721 170.699   4 
  -6   4   4 427.803 116.393   2 
  -6   4   4 387.300 141.648   1 
   6  -4  -4 415.954 142.250   4 
  -6   4   3 367.216 112.370   2 
   6  -4  -3 593.205 168.284   4 
  -6   4   3 608.460 159.310   1 
   6  -4  -2 14832.7 704.864   1 
   6  -4  -2 15028.9 710.683   4 
  -6   4   2 13269.0 650.841   1 
  -6   4   2 13901.5 635.537   2 
   6  -4  -1 41800.5 1138.18   4 
   6  -4  -1 42407.4 1138.02   1 
  -6   4   1 42092.8 896.503   3 
  -6   4   1 41710.1 1088.89   2 
  -6   4   1 39219.8 1083.41   1 
   6  -4   0 23863.1 847.863   4 
   6  -4   0 24511.5 825.477   1 
  -6   4   0 23229.4 648.582   3 
  -6   4   0 23117.8 818.119   2 
  -6   4   0 23766.2 829.489   1 
   6  -4   1 24475.2 836.414   4 
  -6   4  -1 24426.7 867.349   4 
   6  -4   1 24458.1 791.293   1 
  -6   4  -1 24733.9 656.313   3 
  -6   4  -1 24858.6 842.844   1 
  -6   4  -2 22280.8 789.561   1 
   6  -4   2 22997.8 794.461   4 
  -6   4  -2 23227.4 862.039   4 
   6  -4   2 22910.3 737.299   1 
  -6   4  -3 11986.5 578.405   1 
   6  -4   3 12370.0 584.536   4 
  -6   4  -3 12582.6 650.602   4 
  -6   4  -4 6509.50 426.526   1 
   6  -4   4 7034.46 450.045   4 
  -6   4  -5 13110.9 610.601   1 
   6  -4   5 12715.4 602.656   4 
   6  -4   6 5958.16 432.306   4 
  -6   4  -6 6128.03 427.701   1 
   6  -4   7 3449.29 339.561   4 
  -6   4  -7 3546.06 332.461   1 
   6  -4   8 259.714 125.948   4 
  -6   4  -8 282.744 140.980   2 
  -6   4  -8 151.048 113.872   1 
   6  -4   9-74.8433 97.3555   4 
  -6   4  -9-152.287 134.651   2 
  -6   4 -10 6.35041 101.861   2 
  -6   4 -11-198.225 133.389   2 
   6  -3 -12-121.730 157.448   2 
   6  -3 -12 6.38123 184.869   3 
   6  -3 -11 19.8113 159.848   2 
   6  -3 -11-86.5317 137.126   3 
   6  -3 -10 1576.44 344.811   2 
   6  -3  -9 4052.21 483.216   2 
   6  -3  -8 3944.49 463.748   2 
   6  -3  -7 1719.52 306.240   2 
   6  -3  -6 154.400 134.587   4 
   6  -3  -5 150.648 111.128   4 
   6  -3  -4 1271.11 241.455   4 
  -6   3   3 393.262 122.785   2 
   6  -3  -3 512.854 140.561   1 
   6  -3  -3 453.091 160.776   4 
  -6   3   3 260.065 97.6620   1 
  -6   3   3 364.730 108.454   3 
   6  -3  -2 36621.5 1048.04   1 
   6  -3  -2 34596.2 1089.65   4 
  -6   3   2 33359.4 888.201   3 
  -6   3   2 32622.8 939.710   1 
  -6   3   2 33624.4 1013.41   2 
   6  -3  -1 18170.6 702.110   1 
   6  -3  -1 17850.8 771.165   4 
  -6   3   1 17593.5 638.007   3 
  -6   3   1 18064.9 683.622   1 
  -6   3   1 17765.6 741.050   2 
   6  -3   0 177.702 82.3656   1 
   6  -3   0 23.4234 124.671   4 
  -6   3   0 76.2891 64.7127   3 
  -6   3   0 204.919 98.3608   1 
  -6   3   0-112.589 138.358   2 
   6  -3   1 5692.58 419.564   4 
  -6   3  -1 5928.92 442.861   4 
   6  -3   1 6093.22 362.972   1 
  -6   3  -1 6074.54 383.378   1 
   6  -3   2 7850.46 490.088   4 
   6  -3   2 7602.70 379.256   1 
  -6   3  -2 8004.95 421.458   1 
  -6   3  -3 6331.32 375.443   1 
   6  -3   3 6367.46 443.455   4 
  -6   3  -4 7252.69 402.325   1 
   6  -3   4 7490.61 472.592   4 
   6  -3   5 416.290 132.990   4 
  -6   3  -5 476.544 122.487   1 
   6  -3   6 3799.82 352.104   4 
  -6   3  -6 3745.08 300.355   1 
  -6   3  -7 2326.94 242.651   1 
   6  -3   7 1741.90 264.049   4 
   6  -3   8-10.5353 99.6439   4 
   6  -3   9-29.6479 132.225   4 
  -6   3  -9 157.118 132.174   2 
  -6   3 -10 1516.62 280.962   2 
  -6   3 -11 366.746 184.839   2 
   6  -2 -12-171.612 181.543   2 
   6  -2 -11 26.0344 158.452   2 
   6  -2 -10 224.857 173.132   2 
   6  -2  -9 686.512 235.422   2 
   6  -2  -8-178.120 195.858   2 
   6  -2  -7 283.383 168.922   4 
   6  -2  -7 206.860 137.846   2 
   6  -2  -6-100.840 153.666   4 
   6  -2  -5 7249.01 562.189   4 
   6  -2  -4 1545.87 232.325   1 
   6  -2  -4 1411.72 249.365   4 
  -6   2   4 1423.89 211.019   3 
   6  -2  -3 7651.22 480.460   1 
   6  -2  -3 8669.62 578.132   4 
  -6   2   3 7228.25 450.181   3 
   6  -2  -2 11323.0 548.664   1 
   6  -2  -2 11200.9 642.143   4 
  -6   2   2 11367.2 563.971   3 
  -6   2   2 10885.9 599.760   2 
   6  -2  -1 9686.80 479.602   1 
   6  -2  -1 10516.7 607.111   4 
  -6   2   1 9867.33 504.916   3 
  -6   2   1 9696.47 454.833   1 
  -6   2   1 10238.5 584.658   2 
   6  -2   0-45.5375 53.5823   1 
   6  -2   0-34.4010 100.505   4 
  -6   2   0-6.08788 59.7541   1 
   6  -2   1 381.409 128.672   4 
  -6   2  -1 406.603 95.5438   1 
   6  -2   1 433.070 91.2069   1 
   6  -2   2 973.699 181.871   4 
   6  -2   2 998.909 123.856   1 
  -6   2  -2 878.809 125.634   1 
   6  -2   3 4995.13 397.962   4 
  -6   2  -3 4342.06 261.858   1 
  -6   2  -4 785.028 116.526   1 
   6  -2   4 813.845 183.198   4 
  -6   2  -5-99.9449 54.0440   1 
   6  -2   5 53.2071 101.532   4 
   6  -2   6-105.006 127.929   4 
  -6   2  -6 135.447 69.2793   1 
   6  -2   7 2952.71 340.125   4 
   6  -2   8 1906.60 293.450   4 
   6  -2   9 41.8833 145.449   4 
  -6   2  -9 160.975 119.179   2 
   6  -2  10 200.223 139.376   4 
  -6   2 -10-234.404 160.429   2 
   6  -1 -12 594.164 279.723   2 
   6  -1 -11 2669.95 458.866   2 
   6  -1 -10 990.809 277.654   2 
   6  -1  -9 36.6053 169.216   2 
   6  -1  -8 28.9436 138.776   2 
   6  -1  -7 2252.08 347.456   4 
   6  -1  -6 5873.35 529.280   4 
   6  -1  -5 4967.26 476.646   4 
   6  -1  -5 4690.98 407.850   1 
   6  -1  -4 39.1308 64.6583   1 
   6  -1  -4-42.5388 109.750   4 
   6  -1  -3 4703.56 359.699   1 
   6  -1  -3 4312.60 423.782   4 
  -6   1   3 4637.62 380.370   3 
   6  -1  -2 450.246 105.855   1 
   6  -1  -2 189.127 135.000   4 
  -6   1   2 482.570 133.670   3 
   6  -1  -1 8091.35 403.877   1 
   6  -1  -1 7651.64 528.482   4 
   6  -1   0 14771.5 717.218   4 
   6  -1   0 14037.8 472.394   1 
   6  -1   1 1224.02 122.184   1 
   6  -1   1 988.818 208.831   4 
   6  -1   2-28.7181 133.265   4 
   6  -1   3 467.344 153.587   4 
  -6   1  -3 440.057 56.9827   1 
   6  -1   4 5433.29 434.810   4 
  -6   1  -4 4577.61 151.264   1 
   6  -1   5 1291.13 238.979   4 
  -6   1  -5 1179.28 77.8556   1 
   6  -1   6 6183.68 477.083   4 
   6  -1   7 6731.47 510.230   4 
   6  -1   8-56.1977 125.593   4 
  -6   1  -9 2446.56 356.495   2 
   6  -1   9 1886.82 308.400   4 
   6  -1  10 425.629 192.397   4 
  -6   1 -10-80.0007 110.567   2 
   6   0 -12 381.445 222.476   2 
   6   0 -11 1342.53 341.071   2 
   6   0 -10 83.5924 177.187   2 
   6   0  -9 5991.79 605.938   2 
   6   0  -8 4888.90 537.976   4 
   6   0  -7 6968.17 587.583   4 
   6   0  -6 12129.2 760.170   4 
   6   0  -5 13921.6 791.687   4 
   6   0  -5 12680.5 638.551   1 
   6   0  -4 22542.7 979.292   4 
   6   0  -4 22791.4 808.499   1 
   6   0  -3 7111.69 551.190   4 
   6   0  -3 7174.87 420.596   1 
   6   0  -2 6728.29 378.964   1 
   6   0  -2 5408.21 473.839   4 
   6   0  -1 7046.38 346.868   1 
   6   0  -1 7154.99 526.880   4 
   6   0   0 724.418 95.1831   1 
   6   0   0 492.212 193.892   4 
   6   0   1 255.899 149.779   4 
   6   0   2 111.444 119.079   4 
   6   0   3 1901.61 278.392   4 
   6   0   4 1315.95 234.114   4 
   6   0   5 1396.13 256.137   4 
   6   0   6 853.396 206.748   4 
   6   0   7-14.3998 128.317   4 
   6   0   8 211.048 138.633   4 
   6   0   9 718.496 227.272   4 
   6   0  10 178.127 128.985   4 
   6   1 -12 1132.06 302.123   2 
   6   1 -11-44.0188 165.399   2 
   6   1 -10 522.400 252.589   2 
   6   1  -9 205.996 175.921   4 
   6   1  -8 1166.00 292.206   4 
   6   1  -7 257.941 179.328   4 
   6   1  -6 175.517 184.148   4 
   6   1  -5-27.1594 132.766   4 
   6   1  -5 276.534 114.921   1 
   6   1  -4 189.229 152.593   4 
   6   1  -4 198.134 84.9048   1 
   6   1  -3 606.435 192.861   4 
   6   1  -3 387.740 106.107   1 
   6   1  -2 1096.32 150.222   1 
   6   1  -2 1009.25 230.536   4 
   6   1  -1 9054.53 347.598   1 
   6   1  -1 9229.24 614.240   4 
   6   1   0 8140.76 565.692   4 
   6   1   0 6615.50 203.117   1 
   6   1   1 17888.6 822.388   4 
   6   1   2 6419.02 502.318   4 
   6   1   3 4937.21 443.420   4 
   6   1   4 2978.10 349.423   4 
   6   1   5 11255.1 659.788   4 
   6   1   6-84.6430 115.676   4 
   6   1   7 515.251 195.687   4 
   6   1   8 295.658 158.314   4 
   6   1   9 1023.71 272.696   4 
   6   2 -12 306.958 226.188   2 
   6   2 -11 780.871 295.246   2 
   6   2 -10 275.687 191.028   4 
   6   2  -9 697.983 231.467   4 
   6   2  -8-101.931 189.573   4 
   6   2  -7 3815.93 462.536   4 
   6   2  -6 3694.08 443.458   4 
   6   2  -5 173.895 162.818   4 
   6   2  -5 183.482 111.341   1 
   6   2  -4 8722.17 642.688   4 
   6   2  -4 9362.02 486.746   1 
   6   2  -3 4830.32 473.955   4 
   6   2  -3 4616.98 316.304   1 
   6   2  -2 609.492 186.568   4 
   6   2  -2 605.137 104.890   1 
   6   2  -1 3149.10 188.106   1 
   6   2  -1 2468.96 333.417   4 
   6   2   0 9320.49 614.137   4 
   6   2   1 1327.64 247.146   4 
   6   2   2 1124.78 225.450   4 
   6   2   3 74.9555 120.031   4 
   6   2   4 1081.46 256.658   4 
   6   2   5 134.205 164.880   4 
   6   2   6 22.6023 162.720   4 
   6   2   7 277.484 170.949   4 
   6   2   8 2540.43 367.892   4 
   6   3 -12 845.541 263.588   4 
   6   3 -12 595.060 280.094   2 
   6   3 -11 177.481 168.387   4 
   6   3 -10 1301.13 324.294   4 
   6   3  -9 158.671 148.587   4 
   6   3  -8 714.625 237.463   4 
   6   3  -7 4453.21 498.631   4 
   6   3  -6 249.846 164.719   4 
   6   3  -5 3252.64 418.560   4 
   6   3  -5 3034.55 302.716   1 
   6   3  -4 20756.2 978.761   4 
   6   3  -4 21761.5 728.491   1 
   6   3  -3 8961.57 644.586   4 
   6   3  -3 9161.59 434.904   1 
   6   3  -2 1213.69 266.458   4 
   6   3  -2 1807.16 173.252   1 
   6   3  -1 4912.61 466.520   4 
   6   3  -1 5096.38 198.367   1 
   6   3  -1 5105.78 215.735   1 
   6   3   0 6993.24 548.185   4 
   6   3   1 453.374 170.764   4 
   6   3   2 47.3824 128.919   4 
   6   3   3 738.750 190.317   4 
   6   3   4 1187.46 234.874   4 
   6   3   5 208.100 133.156   4 
   6   3   6 1137.74 246.439   4 
   6   3   7 183.168 145.902   4 
   6   3   8 64.8758 165.494   4 
   6   4 -12 98.0164 171.022   4 
   6   4 -11 128.000 150.568   4 
   6   4 -10-15.1955 160.557   4 
   6   4  -9-100.252 169.030   4 
   6   4  -8 9.67342 115.496   4 
   6   4  -7 327.256 186.111   4 
   6   4  -6 1637.80 314.694   4 
   6   4  -5 2574.35 400.411   4 
   6   4  -4 133.413 175.129   4 
   6   4  -3 645.228 211.392   4 
   6   4  -2 129.342 64.9903   1 
   6   4  -2 214.756 69.8638   1 
   6   4  -1 2524.43 344.929   4 
   6   4  -1 2209.49 135.682   1 
   6   4  -1 2579.19 150.124   1 
   6   4   0-602.537 194.615   4 
   6   4   1-79.6504 153.996   4 
   6   4   2 22.3543 144.653   4 
   6   4   3 246.290 133.615   4 
   6   4   4 1291.08 275.202   4 
   6   4   5 313.065 174.510   4 
   6   4   6 1572.97 284.287   4 
   6   4   7 1304.97 262.454   4 
   6   5 -11-404.246 203.705   4 
   6   5 -10 715.483 241.663   4 
   6   5  -9 679.917 242.501   4 
   6   5  -8 264.972 174.772   4 
   6   5  -7 245.867 162.840   4 
   6   5  -6 2876.14 405.870   4 
   6   5  -5 9822.80 719.767   4 
   6   5  -4 89.1859 137.265   4 
   6   5  -3 2058.47 324.490   4 
   6   5  -2 302.722 143.360   4 
   6   5  -2 667.852 118.329   1 
   6   5  -1 644.743 197.406   4 
   6   5   0 18.9516 116.611   4 
   6   5   1 396.220 145.638   4 
   6   5   2 342.215 152.236   4 
   6   5   3 386.538 183.730   4 
   6   5   4 80.3403 135.717   4 
   6   5   5 171.707 121.771   4 
   6   5   6 383.298 150.094   4 
   6   6 -11 36.9635 109.831   4 
   6   6 -10 880.136 284.034   4 
   6   6  -9 245.358 152.951   4 
   6   6  -8 613.616 226.920   4 
   6   6  -7 504.686 198.478   4 
   6   6  -6 41.7950 128.866   4 
   6   6  -5 279.454 154.383   4 
   6   6  -5 273.828 120.111   1 
   6   6  -4 1362.29 290.195   4 
   6   6  -4 1686.35 225.589   1 
   6   6  -3 3043.95 398.728   4 
   6   6  -2 2956.18 384.865   4 
   6   6  -1-82.5995 145.156   4 
   6   6   0 294.921 162.952   4 
   6   6   1-143.930 134.121   4 
   6   6   2-97.8595 137.624   4 
   6   6   3-79.5969 112.552   4 
   6   6   4 1839.83 320.192   4 
   6   6   5 174.861 147.077   4 
   6   7 -10 719.457 264.557   4 
   6   7  -9 337.683 200.472   4 
   6   7  -8 70.1599 132.209   4 
   6   7  -7-147.516 146.672   4 
   6   7  -6 321.837 138.680   1 
   6   7  -6 7.97604 142.146   4 
   6   7  -5 585.722 220.918   4 
   6   7  -5 398.014 133.472   1 
   6   7  -4-8.24507 91.3829   1 
   6   7  -4 105.935 144.922   4 
   6   7  -3 631.844 208.988   4 
   6   7  -2 17.7397 138.435   4 
   6   7  -1 110.385 121.063   4 
   6   7   0 311.874 132.677   4 
   6   7   1 198.179 142.465   4 
   6   7   2 293.473 167.448   4 
   6   7   3 306.631 161.165   4 
   6   7   4-197.295 168.141   4 
   6   8 -10-238.551 154.541   4 
   6   8  -9 632.032 207.941   1 
   6   8  -9 167.023 171.623   4 
   6   8  -8 72.9757 106.100   1 
   6   8  -8 348.115 172.203   4 
   6   8  -7 163.422 146.163   1 
   6   8  -7 107.204 121.120   4 
   6   8  -6-8.91184 119.080   4 
   6   8  -6-7.47804 108.057   1 
   6   8  -5-70.4409 127.288   4 
   6   8  -4 1097.63 252.927   4 
   6   8  -3-293.062 190.519   4 
   6   8  -2 314.734 167.669   4 
   6   8  -1-91.8245 97.0862   4 
   6   8   0-107.272 153.209   4 
   6   8   1 446.518 167.803   4 
   6   8   2 170.738 131.923   4 
   6   8   3 55.8253 124.983   4 
   6   9  -9 695.430 229.651   1 
   6   9  -9 478.061 217.621   4 
   6   9  -8 680.885 225.565   4 
   6   9  -7 99.3199 127.329   4 
   6   9  -6 306.858 154.657   4 
   6   9  -5 113.362 94.8619   4 
   6   9  -4-377.725 172.508   4 
   6   9  -3 384.944 182.274   4 
   6   9  -2 99.1072 131.605   4 
   6   9  -1 105.904 141.661   4 
   6   9   0 105.165 131.263   4 
   6   9   1 162.876 125.257   4 
   6  10  -6-299.817 157.295   4 
   6  10  -5-442.487 184.878   4 
   6  10  -4 155.977 130.898   4 
   6  10  -3 224.491 143.440   4 
   6  10  -2 315.829 169.176   4 
   6  10  -1 168.524 127.068   4 
  -7  11   1 587.181 229.463   1 
  -7  11   0 41.4287 135.161   1 
  -7  11  -1 276.756 172.754   1 
  -7  11  -2 414.957 193.329   1 
  -7  11  -3-91.0601 108.918   1 
  -7  11  -4-38.6842 118.415   1 
  -7  10   4-183.007 184.607   1 
  -7  10   3-178.933 161.475   1 
  -7  10   2 94.8536 134.158   1 
  -7  10   1 17.8165 158.867   1 
  -7  10   0 1284.98 315.930   1 
  -7  10  -1 979.312 269.704   1 
  -7  10  -2 58.4444 171.706   1 
  -7  10  -3 133.859 126.794   1 
  -7  10  -4 850.220 259.999   1 
  -7  10  -5 770.912 237.239   1 
  -7  10  -6 129.766 138.364   1 
  -7  10  -7 1180.43 307.662   1 
  -7   9   6-29.7326 123.089   1 
  -7   9   5 47.2302 133.754   1 
  -7   9   4 521.616 216.702   1 
  -7   9   3-34.8874 195.735   1 
  -7   9   2 1829.91 362.927   1 
  -7   9   1 3652.66 483.502   1 
  -7   9   0 1071.56 267.360   1 
  -7   9  -1-8.97785 133.548   1 
  -7   9  -2 585.984 197.553   1 
  -7   9  -3 4494.50 518.530   1 
  -7   9  -4 9589.85 753.797   1 
  -7   9  -5 5.36477 128.028   1 
  -7   9  -6 322.958 157.586   1 
  -7   9  -7 115.302 135.278   1 
  -7   9  -8-458.919 180.282   1 
   7  -8  -9 257.061 192.157   3 
   7  -8  -8-137.408 131.306   4 
   7  -8  -7 82.3726 125.857   4 
  -7   8   6 678.738 230.605   1 
   7  -8  -6 924.257 230.473   4 
   7  -8  -5 220.406 141.268   4 
  -7   8   5 498.952 237.758   1 
   7  -8  -4 233.158 140.695   4 
  -7   8   4 267.490 144.067   1 
   7  -8  -3 1325.37 223.984   4 
  -7   8   3 1064.90 254.636   1 
   7  -8  -2 5320.22 415.015   4 
  -7   8   2 5320.82 549.026   1 
   7  -8  -1 5567.42 404.467   4 
  -7   8   1 5336.71 541.914   1 
   7  -8   0 4211.80 334.616   4 
  -7   8   0 4244.11 482.266   1 
   7  -8   1 3339.14 291.639   4 
  -7   8  -1 3172.04 408.208   1 
  -7   8  -2 7671.24 643.770   1 
   7  -8   2 8038.41 427.033   4 
  -7   8  -3 11852.4 792.047   1 
  -7   8  -4 323.455 154.580   1 
  -7   8  -5-408.296 174.000   1 
  -7   8  -6 3885.04 460.536   1 
  -7   8  -7 2139.76 349.933   1 
  -7   8  -8 849.814 230.292   1 
   7  -7 -10 1090.16 316.079   2 
   7  -7  -9 919.616 265.416   2 
   7  -7  -8 230.735 151.018   4 
   7  -7  -7 360.217 193.952   4 
   7  -7  -6 660.124 218.794   4 
  -7   7   6 601.878 235.435   1 
   7  -7  -5 10957.4 705.096   4 
  -7   7   5 10936.2 769.051   1 
   7  -7  -4 2885.22 354.077   4 
  -7   7   4 3060.91 403.280   1 
   7  -7  -3 1031.42 208.174   4 
  -7   7   3 1288.61 275.638   1 
   7  -7  -2 4662.76 407.773   4 
  -7   7   2 4341.66 467.409   1 
   7  -7  -1 8710.94 528.082   4 
  -7   7   1 8293.54 637.849   1 
   7  -7   0 7054.23 458.177   4 
  -7   7   0 6820.43 571.383   1 
  -7   7  -1 151.176 98.6155   1 
   7  -7   1 164.045 89.5595   4 
  -7   7  -2 2006.23 316.771   1 
   7  -7   2 2201.09 243.768   4 
  -7   7  -3 1556.41 291.703   1 
   7  -7   3 1164.67 188.766   4 
  -7   7  -4 683.664 190.327   1 
   7  -7   4 682.014 144.096   4 
  -7   7  -5-51.8804 139.299   1 
   7  -7   5 98.2329 89.7783   4 
   7  -7   6 702.349 153.224   4 
  -7   7  -6 506.395 166.881   1 
   7  -7   7 32.7071 86.3044   4 
  -7   7  -7-47.6560 86.5151   1 
   7  -6 -11 1626.75 360.453   2 
   7  -6 -10 2526.74 441.928   2 
   7  -6  -9 725.568 233.326   2 
   7  -6  -8 432.187 193.178   4 
   7  -6  -7 1289.20 291.573   4 
   7  -6  -6 8299.32 653.014   4 
  -7   6   5 2187.32 344.577   1 
   7  -6  -5 1862.53 309.167   4 
   7  -6  -4 131.584 103.605   4 
  -7   6   4 70.2388 152.437   1 
   7  -6  -3 630.288 165.799   4 
  -7   6   3 508.824 187.426   1 
   7  -6  -2 3434.02 362.510   4 
  -7   6   2 3064.12 379.214   1 
   7  -6  -1 1178.88 228.347   4 
  -7   6   1 1124.23 244.102   1 
   7  -6   0 521.341 151.461   4 
  -7   6   0 501.365 183.733   1 
   7  -6   1 2077.45 258.740   4 
  -7   6  -1 1702.98 267.157   1 
   7  -6   2 4492.55 372.322   4 
  -7   6  -2 4578.55 432.661   1 
  -7   6  -3-9.95060 83.7484   1 
   7  -6   3 94.2680 96.5122   4 
  -7   6  -4 919.388 202.612   1 
   7  -6   4 751.306 165.531   4 
  -7   6  -5 16.3042 65.1939   1 
   7  -6   5 156.575 99.0868   4 
   7  -6   6 140.659 88.0665   4 
  -7   6  -6 265.751 113.990   1 
   7  -6   7 821.932 170.280   4 
  -7   6  -7 974.734 206.753   1 
  -7   6  -7 797.997 180.202   2 
   7  -6   8 65.5915 118.657   4 
  -7   6  -8-71.8616 105.816   2 
  -7   6  -9 37.1448 80.0412   2 
   7  -5 -11-63.3034 148.501   2 
   7  -5 -10 434.915 217.052   2 
   7  -5  -9 474.559 204.808   2 
   7  -5  -8 4558.35 515.955   4 
   7  -5  -7 7766.77 660.504   4 
   7  -5  -6 7860.67 638.742   4 
   7  -5  -5 1032.77 236.801   4 
   7  -5  -4 65.3697 100.894   4 
  -7   5   4 58.9006 94.4270   1 
   7  -5  -3 4748.26 448.436   4 
  -7   5   3 5330.93 475.917   1 
   7  -5  -2 588.311 166.865   4 
  -7   5   2 622.282 170.681   1 
   7  -5  -1 4924.05 429.747   4 
  -7   5   1 4884.19 430.249   1 
  -7   5   1 4601.73 386.595   2 
   7  -5   0 10900.5 611.196   4 
  -7   5   0 10060.0 574.239   2 
  -7   5   0 10651.6 624.521   1 
   7  -5   1 68.5015 91.4092   4 
  -7   5  -1 109.181 127.544   1 
   7  -5   2 111.891 110.409   4 
  -7   5  -2 106.118 93.4144   1 
  -7   5  -3 469.038 144.292   1 
   7  -5   3 256.786 109.911   4 
  -7   5  -4 3573.66 354.162   1 
   7  -5   4 3598.30 342.924   4 
  -7   5  -5 179.125 102.755   1 
   7  -5   5 360.355 124.463   4 
  -7   5  -6 627.002 154.677   1 
   7  -5   6 749.750 180.396   4 
   7  -5   7 125.625 106.465   4 
   7  -5   8 1085.55 220.749   4 
  -7   5  -8 665.501 157.942   2 
   7  -5   9 164.471 118.816   4 
  -7   5  -9 183.350 119.331   2 
  -7   5 -10 390.517 172.777   2 
   7  -4 -11 230.831 170.194   2 
   7  -4 -10 179.342 157.700   2 
   7  -4  -9 94.7074 138.336   4 
   7  -4  -9 7.25402 137.121   2 
   7  -4  -8 2227.77 392.831   4 
   7  -4  -7 1495.65 316.206   4 
   7  -4  -6 4141.54 478.138   4 
   7  -4  -5 746.019 235.741   4 
   7  -4  -4 3012.25 380.759   4 
   7  -4  -3 633.626 178.314   4 
  -7   4   3 661.002 178.756   1 
   7  -4  -2-84.5959 162.689   4 
  -7   4   2 32.4837 100.660   1 
  -7   4   2-4.68263 88.9310   3 
   7  -4  -1 2523.09 334.313   4 
   7  -4  -1 2336.33 279.933   1 
  -7   4   1 1695.84 198.155   3 
  -7   4   1 2248.25 278.555   1 
   7  -4   0 22111.2 890.738   4 
   7  -4   0 20979.6 789.742   1 
  -7   4   0 20921.7 695.524   3 
  -7   4   0 21289.3 808.788   1 
   7  -4   1 7313.05 508.682   4 
   7  -4   1 8035.30 467.527   1 
  -7   4  -1 7487.78 414.208   3 
  -7   4  -1 7559.04 479.747   1 
   7  -4   2 187.185 72.8472   1 
   7  -4   2 117.269 106.454   4 
  -7   4  -2 60.2746 87.3106   1 
   7  -4   3 2592.91 304.799   4 
  -7   4  -3 2791.91 282.222   1 
  -7   4  -4 568.704 128.072   1 
   7  -4   4 938.141 208.321   4 
  -7   4  -5 17.4777 52.9684   1 
   7  -4   5 14.5672 102.010   4 
   7  -4   6 457.018 141.391   4 
   7  -4   7 785.922 195.971   4 
   7  -4   8 1178.78 232.429   4 
  -7   4  -8 1058.06 229.744   2 
   7  -4   9-337.431 155.895   4 
  -7   4  -9-287.999 147.083   2 
  -7   4 -10 386.940 153.100   2 
   7  -3 -11 799.516 274.357   2 
   7  -3 -10 750.058 272.749   2 
   7  -3  -9-102.386 157.254   4 
   7  -3  -8 217.769 178.670   4 
   7  -3  -7-231.248 230.345   4 
   7  -3  -6 466.419 219.336   4 
   7  -3  -5 1948.66 337.560   4 
   7  -3  -4-13.8882 142.455   4 
   7  -3  -3-186.677 156.383   4 
  -7   3   3-98.3777 83.9336   3 
   7  -3  -2 112.332 84.2773   1 
  -7   3   2 159.614 90.0744   3 
   7  -3  -1-4.62629 59.1459   1 
   7  -3  -1-260.779 158.671   4 
  -7   3   1-61.9005 118.186   1 
  -7   3   1 100.707 91.1029   3 
   7  -3   0 1628.49 212.654   1 
   7  -3   0 1478.94 260.655   4 
  -7   3   0 1401.93 202.304   1 
  -7   3   0 1468.37 213.436   3 
   7  -3   1 2566.77 321.796   4 
   7  -3   1 3255.73 275.320   1 
  -7   3  -1 3140.56 277.590   1 
   7  -3   2 2831.50 333.211   4 
   7  -3   2 2450.62 217.686   1 
  -7   3  -2 2439.61 239.765   1 
   7  -3   3 226.523 130.649   4 
  -7   3  -3 238.427 86.8477   1 
   7  -3   4 897.391 208.866   4 
  -7   3  -4 835.588 140.107   1 
   7  -3   5-96.1458 126.609   4 
   7  -3   6-89.7027 132.673   4 
   7  -3   7 405.545 161.948   4 
   7  -3   8 1582.25 274.813   4 
   7  -3   9 277.223 154.831   4 
  -7   3  -9 501.716 186.505   2 
   7  -3  10 2281.38 349.075   4 
   7  -2 -11-32.6901 133.648   2 
   7  -2 -10 328.113 219.363   4 
   7  -2 -10 197.723 159.088   2 
   7  -2  -9 608.863 287.482   4 
   7  -2  -8 86.5097 131.127   4 
   7  -2  -7 1636.67 342.850   4 
   7  -2  -6 3951.54 473.530   4 
   7  -2  -5 69.4034 108.366   4 
   7  -2  -4 151.207 138.332   4 
   7  -2  -3 923.127 179.332   1 
   7  -2  -3 723.194 190.056   4 
   7  -2  -2-25.0642 191.681   4 
   7  -2  -2 246.395 105.622   1 
  -7   2   2 417.422 152.744   3 
   7  -2  -1 6580.11 531.168   4 
   7  -2  -1 6665.14 412.934   1 
  -7   2   1 7418.30 488.055   3 
   7  -2   0 8696.83 603.718   4 
   7  -2   0 8985.59 437.119   1 
   7  -2   1 28171.7 1046.13   4 
   7  -2   1 25464.8 652.719   1 
   7  -2   2 3592.48 386.563   4 
  -7   2  -2 3865.16 243.011   1 
   7  -2   3 1434.86 265.946   4 
  -7   2  -3 972.057 114.925   1 
   7  -2   4 5660.87 473.619   4 
   7  -2   5 5471.55 472.185   4 
   7  -2   6 3379.21 388.194   4 
   7  -2   7 1896.10 310.418   4 
   7  -2   8 210.854 114.054   4 
   7  -2   9 1204.09 284.130   4 
  -7   2  -9 1285.17 269.947   2 
   7  -1 -11 309.345 172.711   2 
   7  -1 -11 254.670 165.984   4 
   7  -1 -10 754.063 279.009   4 
   7  -1  -9 856.720 271.881   4 
   7  -1  -8 2087.83 377.938   4 
   7  -1  -7 2176.65 360.655   4 
   7  -1  -6 281.292 192.950   4 
   7  -1  -5 158.813 118.788   4 
   7  -1  -4 486.871 145.847   1 
   7  -1  -4 415.297 186.264   4 
   7  -1  -3 1054.93 180.785   1 
   7  -1  -3 974.935 252.920   4 
   7  -1  -2 3132.31 288.601   1 
   7  -1  -2 2524.31 353.072   4 
   7  -1  -1 4986.17 328.121   1 
   7  -1  -1 5118.05 484.482   4 
   7  -1   0 11436.9 696.063   4 
   7  -1   0 10916.2 418.643   1 
   7  -1   1 5141.03 466.224   4 
   7  -1   1 4572.75 221.072   1 
   7  -1   2 389.557 137.482   4 
   7  -1   3 3600.69 401.018   4 
   7  -1   4 6111.11 508.585   4 
   7  -1   5 3513.68 397.372   4 
   7  -1   6 1970.52 301.895   4 
   7  -1   7 745.529 204.715   4 
   7  -1   8 151.469 125.431   4 
   7  -1   9 365.426 185.562   4 
   7   0 -11 270.576 253.847   4 
   7   0 -10 150.687 188.101   4 
   7   0  -9 851.794 276.624   4 
   7   0  -8 182.361 152.920   4 
   7   0  -7 766.006 233.423   4 
   7   0  -6 1341.48 275.576   4 
   7   0  -5 354.859 157.327   4 
   7   0  -4 3690.66 437.379   4 
   7   0  -4 3496.02 328.563   1 
   7   0  -3 3242.22 299.807   1 
   7   0  -3 2795.37 393.804   4 
   7   0  -2 1838.41 207.388   1 
   7   0  -2 1734.20 309.776   4 
   7   0  -1 440.085 183.679   4 
   7   0  -1 409.149 91.3197   1 
   7   0   0 370.082 183.635   4 
   7   0   0 187.512 45.9089   1 
   7   0   1 4169.76 428.003   4 
   7   0   2 1.09632 150.482   4 
   7   0   3 3650.55 398.777   4 
   7   0   4 341.634 165.253   4 
   7   0   5 498.016 174.804   4 
   7   0   6 139.677 130.050   4 
   7   0   7 362.183 179.526   4 
   7   0   8 122.325 119.607   4 
   7   1 -11 1421.74 351.766   4 
   7   1 -10 51.6822 135.399   4 
   7   1  -9 6.00474 152.070   4 
   7   1  -8 305.047 193.676   4 
   7   1  -7-233.013 219.253   4 
   7   1  -6 1492.59 315.622   4 
   7   1  -5 1702.69 325.843   4 
   7   1  -5 1657.25 243.884   1 
   7   1  -4 1556.81 315.509   4 
   7   1  -4 1428.49 203.348   1 
   7   1  -3 1197.52 180.390   1 
   7   1  -3 1061.48 247.947   4 
   7   1  -2 261.087 73.2617   1 
   7   1  -2 136.789 150.611   4 
   7   1  -1 1845.38 155.326   1 
   7   1  -1 1396.46 272.288   4 
   7   1   0 397.125 162.841   4 
   7   1   1-276.347 219.194   4 
   7   1   2 1189.75 250.407   4 
   7   1   3 89.5391 147.879   4 
   7   1   4 399.561 177.079   4 
   7   1   5 1078.88 256.147   4 
   7   1   6 3570.85 423.134   4 
   7   1   7 823.358 215.421   4 
   7   2 -11 1397.16 359.261   4 
   7   2 -10 581.810 245.600   4 
   7   2  -9 843.885 259.040   4 
   7   2  -8 905.456 271.787   4 
   7   2  -7 633.432 221.582   4 
   7   2  -6 6932.34 647.214   4 
   7   2  -5 6185.65 591.185   4 
   7   2  -4 4818.90 524.794   4 
   7   2  -4 5625.12 400.468   1 
   7   2  -3 1518.45 303.192   4 
   7   2  -3 1233.78 169.996   1 
   7   2  -2 79.8506 140.715   4 
   7   2  -1 293.715 177.254   4 
   7   2   0 604.859 198.183   4 
   7   2   1 1579.02 288.568   4 
   7   2   2 302.065 149.648   4 
   7   2   3 1709.97 294.843   4 
   7   2   4 213.685 172.003   4 
   7   2   5 233.105 155.334   4 
   7   2   6 6.89025 121.783   4 
   7   2   7 198.194 155.593   4 
   7   3 -10-182.322 168.180   4 
   7   3  -9 991.124 276.548   4 
   7   3  -8 197.014 162.949   4 
   7   3  -7 1548.65 319.886   4 
   7   3  -6 1606.41 338.200   4 
   7   3  -5 190.251 175.796   4 
   7   3  -4-52.9333 133.790   4 
   7   3  -3 707.085 251.698   4 
   7   3  -2 270.597 154.296   4 
   7   3  -1 1056.53 245.834   4 
   7   3   0-87.4484 125.590   4 
   7   3   1 378.265 180.365   4 
   7   3   2 2089.58 338.788   4 
   7   3   3 1318.78 282.553   4 
   7   3   4 2166.43 344.878   4 
   7   3   5 2562.31 363.167   4 
   7   3   6 558.626 206.037   4 
   7   4 -10 671.317 254.627   4 
   7   4  -9 234.693 141.205   4 
   7   4  -8-64.8532 152.609   4 
   7   4  -7 421.477 190.372   4 
   7   4  -6 1567.30 347.350   4 
   7   4  -5 1345.57 311.061   4 
   7   4  -4-70.8216 159.068   4 
   7   4  -3 27.3359 143.252   4 
   7   4  -2 1451.01 310.939   4 
   7   4  -1 383.181 186.487   4 
   7   4   0 827.059 244.480   4 
   7   4   1 383.484 177.188   4 
   7   4   2 720.081 215.719   4 
   7   4   3-257.303 157.785   4 
   7   4   4 101.553 146.737   4 
   7   4   5-13.2925 103.117   4 
   7   5  -9-66.9287 95.3825   4 
   7   5  -8 141.364 140.482   4 
   7   5  -7-137.435 155.036   4 
   7   5  -6 235.468 165.626   4 
   7   5  -5-6.10655 186.828   4 
   7   5  -4 1298.54 302.925   4 
   7   5  -3 4221.56 505.487   4 
   7   5  -2 1109.36 282.945   4 
   7   5  -1 1296.80 284.228   4 
   7   5   0 617.514 214.568   4 
   7   5   1 402.758 195.128   4 
   7   5   2 99.1615 137.347   4 
   7   5   3-367.248 167.577   4 
   7   5   4 537.709 216.606   4 
   7   6  -9 545.514 222.720   4 
   7   6  -8-99.0119 147.138   4 
   7   6  -7-187.734 157.297   4 
   7   6  -6 146.962 173.019   4 
   7   6  -5 793.554 252.586   4 
   7   6  -4 134.848 135.243   4 
   7   6  -3-134.163 151.009   4 
   7   6  -2-474.376 205.193   4 
   7   6  -1-59.9408 128.474   4 
   7   6   0-160.504 190.550   4 
   7   6   1 350.177 201.015   4 
   7   6   2 72.7796 105.350   4 
   7   7  -8-122.498 157.641   4 
   7   7  -7 297.429 192.801   4 
   7   7  -6-84.3043 118.497   4 
   7   7  -5 1424.87 346.043   4 
   7   7  -4 147.939 153.364   4 
   7   7  -3 260.771 162.703   4 
   7   7  -2-157.121 152.895   4 
   7   7  -1 145.851 129.106   4 
   7   7   0 873.561 235.663   4 
   7   7   1-180.065 156.274   4 
   7   8  -6 172.755 154.207   4 
   7   8  -5-444.148 203.197   4 
   7   8  -4 400.677 188.674   4 
   7   8  -3 246.149 162.403   4 
   7   8  -2-113.581 135.996   4 
  -8  10   2 5586.73 634.279   1 
  -8  10   1 8143.10 750.341   1 
  -8  10   0 1663.16 335.528   1 
  -8  10  -1 643.991 212.298   1 
  -8  10  -2 325.119 169.892   1 
  -8  10  -3 499.329 200.766   1 
  -8  10  -4 7.09917 97.9865   1 
  -8  10  -5 648.689 228.935   1 
  -8   9   4 1663.87 365.574   1 
  -8   9   3 491.820 176.708   1 
  -8   9   2 1358.74 305.754   1 
  -8   9   1 636.869 232.876   1 
  -8   9   0 393.068 173.199   1 
  -8   9  -1 1056.12 256.603   1 
  -8   9  -2 555.916 192.450   1 
  -8   9  -3 178.865 133.469   1 
  -8   9  -4 291.162 156.996   1 
  -8   9  -5 1305.03 304.425   1 
   8  -8  -8 455.226 202.730   4 
   8  -8  -7 1810.06 350.663   4 
   8  -8  -6 251.433 136.124   4 
   8  -8  -5 1146.92 263.727   4 
  -8   8   5 915.899 258.292   1 
   8  -8  -4-60.8953 99.6729   4 
  -8   8   4 282.563 161.243   1 
   8  -8  -3 706.154 175.733   4 
  -8   8   3 659.687 215.406   1 
   8  -8  -2 1185.45 229.752   4 
  -8   8   2 897.736 239.426   1 
  -8   8   1 148.718 117.321   1 
  -8   8   0 165.646 149.071   1 
  -8   8  -1-72.7485 125.251   1 
  -8   8  -2 318.608 151.952   1 
  -8   8  -3 384.902 174.000   1 
  -8   8  -4 270.244 132.014   1 
  -8   8  -5 419.246 160.871   1 
   8  -7  -9 1011.61 301.630   4 
   8  -7  -8 1656.34 359.825   4 
   8  -7  -7 144.262 145.743   4 
   8  -7  -6 867.899 230.109   4 
   8  -7  -5 4.71842 153.417   4 
  -8   7   5 191.655 154.062   1 
   8  -7  -4-725.797 210.138   4 
  -8   7   4-435.778 175.089   1 
   8  -7  -3 32.0287 113.053   4 
  -8   7   3-376.095 165.955   1 
   8  -7  -2 1668.76 272.763   4 
  -8   7   2 1686.31 321.428   1 
   8  -7  -1 2593.99 327.390   4 
  -8   7   1 2683.83 389.784   1 
   8  -7   0 1763.85 267.262   4 
  -8   7   0 1980.68 315.054   1 
   8  -7   1 840.183 187.798   4 
  -8   7  -1 1424.96 278.888   1 
   8  -7   2 232.694 115.706   4 
  -8   7  -2 231.000 104.991   1 
   8  -7   3 1919.63 259.843   4 
  -8   7  -3 1316.51 257.504   1 
  -8   7  -4 7041.01 575.952   1 
   8  -7   4 6968.82 466.882   4 
   8  -6  -9 694.709 272.105   4 
   8  -6  -8 441.346 222.426   4 
   8  -6  -7 434.476 225.725   4 
   8  -6  -6 982.148 255.814   4 
   8  -6  -5 373.723 189.893   4 
   8  -6  -4-5.76396 124.972   4 
  -8   6   4 63.7466 130.558   1 
   8  -6  -3 1713.68 304.477   4 
  -8   6   3 1317.30 280.777   1 
   8  -6  -2 3105.03 376.837   4 
  -8   6   2 2807.91 365.815   1 
   8  -6  -1-34.0102 121.731   4 
  -8   6   1 163.501 145.479   1 
   8  -6   0 2220.19 311.017   4 
  -8   6   0 2388.75 331.432   1 
   8  -6   1 3306.06 364.572   4 
  -8   6  -1 3546.67 391.423   1 
   8  -6   2 5713.13 457.583   4 
  -8   6  -2 5743.09 494.974   1 
   8  -6   3 4765.13 415.985   4 
  -8   6  -3 5308.45 463.277   1 
   8  -6   4 4026.80 380.304   4 
  -8   6  -4 4127.01 410.104   1 
   8  -6   5 527.252 156.094   4 
   8  -6   6 861.438 197.084   4 
   8  -6   7 445.610 141.288   4 
   8  -5  -9 597.756 249.311   4 
   8  -5  -8 1231.05 313.826   4 
   8  -5  -7 947.560 288.255   4 
   8  -5  -6 49.8758 156.847   4 
   8  -5  -5 3400.43 450.829   4 
   8  -5  -4 3395.45 436.653   4 
   8  -5  -3 4582.83 477.655   4 
  -8   5   3 4796.76 460.446   1 
   8  -5  -2 1036.77 239.704   4 
  -8   5   2 1223.64 242.440   1 
   8  -5  -1 7470.55 568.302   4 
  -8   5   1 7560.19 544.877   1 
   8  -5   0 11565.4 688.913   4 
  -8   5   0 12434.0 682.676   1 
   8  -5   1 1659.39 267.408   4 
  -8   5  -1 1350.63 233.892   1 
   8  -5   2 335.960 146.384   4 
  -8   5  -2 24.8541 102.151   1 
   8  -5   3 1591.79 260.547   4 
  -8   5  -3 1951.52 272.408   1 
   8  -5   4 528.682 167.534   4 
   8  -5   5-18.6572 115.347   4 
   8  -5   6 191.944 104.180   4 
   8  -5   7 489.689 170.849   4 
   8  -5   8 34.6350 103.594   4 
  -8   5  -8 261.182 126.321   2 
   8  -4 -10 809.928 286.820   4 
   8  -4  -9 923.887 284.969   4 
   8  -4  -8 91.7395 124.598   4 
   8  -4  -7 176.431 187.604   4 
   8  -4  -6 3328.74 472.754   4 
   8  -4  -5 4246.00 505.945   4 
   8  -4  -4 476.566 186.414   4 
   8  -4  -3-389.624 177.699   4 
   8  -4  -2 683.471 187.741   4 
   8  -4  -1 2241.54 339.917   4 
  -8   4   1 1909.12 263.099   1 
   8  -4   0 1750.92 308.066   4 
  -8   4   0 1689.25 245.743   1 
   8  -4   1 132.528 116.472   4 
  -8   4  -1-37.3780 72.7335   1 
   8  -4   2 255.484 140.693   4 
  -8   4  -2 265.543 94.8478   1 
   8  -4   3 1620.46 269.153   4 
   8  -4   4 17.5766 128.339   4 
   8  -4   5 4.71583 104.371   4 
   8  -4   6 68.4842 96.3251   4 
   8  -4   7-177.474 128.546   4 
   8  -4   8 231.584 144.907   4 
   8  -3 -10 478.002 218.364   4 
   8  -3  -9 1331.76 340.707   4 
   8  -3  -8 841.611 253.221   4 
   8  -3  -7 3449.89 480.595   4 
   8  -3  -6 9492.71 762.053   4 
   8  -3  -5 2095.77 369.692   4 
   8  -3  -4 2210.66 359.313   4 
   8  -3  -3 394.200 174.376   4 
   8  -3  -2 460.675 183.098   4 
   8  -3  -1 604.811 209.636   4 
   8  -3   0 7888.70 612.698   4 
   8  -3   1 2013.01 312.234   4 
   8  -3   2 1269.79 252.212   4 
   8  -3   3 6.06529 112.076   4 
   8  -3   4 1616.38 270.678   4 
   8  -3   5 815.640 209.155   4 
   8  -3   6-66.3893 106.559   4 
   8  -3   7 165.424 145.377   4 
   8  -3   8 56.8650 126.625   4 
   8  -2 -10-413.280 221.482   4 
   8  -2  -9 91.9195 182.417   4 
   8  -2  -8 0.88454 150.531   4 
   8  -2  -7 1774.67 357.236   4 
   8  -2  -6 2962.83 456.401   4 
   8  -2  -5 816.649 262.564   4 
   8  -2  -4 1471.83 310.143   4 
   8  -2  -3-133.938 205.446   4 
   8  -2  -2 1981.60 342.837   4 
   8  -2  -1 3767.84 439.796   4 
   8  -2   0 79.2273 145.111   4 
   8  -2   1 8632.59 640.873   4 
   8  -2   2 1637.71 291.946   4 
   8  -2   3 33.4064 136.364   4 
   8  -2   4 418.306 191.361   4 
   8  -2   5 48.4748 113.058   4 
   8  -2   6 53.4546 117.691   4 
   8  -2   7 98.3048 130.324   4 
   8  -1  -9 0.94657 152.348   4 
   8  -1  -8 90.2620 185.769   4 
   8  -1  -7 192.661 178.714   4 
   8  -1  -6 9.77604 150.408   4 
   8  -1  -5 273.197 155.208   4 
   8  -1  -4 107.305 223.239   4 
   8  -1  -3 0.70296 168.862   4 
   8  -1  -2 3898.12 480.007   4 
   8  -1  -1 712.899 227.719   4 
   8  -1   0 1014.03 268.224   4 
   8  -1   1 366.221 192.423   4 
   8  -1   2 1978.47 340.737   4 
   8  -1   3 930.290 239.585   4 
   8  -1   4-47.7210 142.851   4 
   8  -1   5 826.832 229.008   4 
   8  -1   6 248.359 135.834   4 
   8   0  -9 262.247 195.769   4 
   8   0  -8 556.705 259.887   4 
   8   0  -7 158.893 181.225   4 
   8   0  -6 586.613 199.535   4 
   8   0  -5 32.1035 200.814   4 
   8   0  -4-51.0044 176.559   4 
   8   0  -3 562.019 227.862   4 
   8   0  -2 346.000 183.991   4 
   8   0  -1 3296.08 440.297   4 
   8   0   0 89.8521 154.034   4 
   8   0   1 4160.00 478.398   4 
   8   0   2 3983.32 453.849   4 
   8   0   3 517.599 204.770   4 
   8   0   4 227.272 142.400   4 
   8   0   5 478.345 194.696   4 
   8   0   6 2232.35 346.986   4 
   8   1  -9-120.746 239.683   4 
   8   1  -8 197.530 200.831   4 
   8   1  -7-76.3369 199.559   4 
   8   1  -6 451.966 210.910   4 
   8   1  -5 247.781 161.871   4 
   8   1  -4 408.787 207.125   4 
   8   1  -3-18.5622 134.881   4 
   8   1  -2 1883.63 339.400   4 
   8   1  -1 472.386 204.530   4 
   8   1   0 1785.84 338.253   4 
   8   1   1 4234.66 487.787   4 
   8   1   2 518.735 190.084   4 
   8   1   3 405.158 185.798   4 
   8   1   4 1211.27 277.759   4 
   8   1   5 3942.40 469.892   4 
   8   2  -9 451.432 196.299   4 
   8   2  -8-547.096 236.906   4 
   8   2  -7 425.744 194.289   4 
   8   2  -6-17.0905 186.123   4 
   8   2  -5 426.424 224.432   4 
   8   2  -4 222.086 174.841   4 
   8   2  -3 2904.78 425.551   4 
   8   2  -2 1207.43 304.159   4 
   8   2  -1 55.2572 121.261   4 
   8   2   0 122.553 176.583   4 
   8   2   1-59.4509 144.994   4 
   8   2   2 110.168 148.521   4 
   8   2   3 107.613 136.413   4 
   8   2   4 127.592 144.251   4 
   8   3  -8-213.511 227.283   4 
   8   3  -7 86.2557 145.370   4 
   8   3  -6 225.260 159.891   4 
   8   3  -5 245.346 207.194   4 
   8   3  -4 1504.29 331.893   4 
   8   3  -3 1885.69 356.891   4 
   8   3  -2 133.137 157.239   4 
   8   3  -1 34.1839 118.974   4 
   8   3   0 740.770 231.249   4 
   8   3   1-98.3475 197.645   4 
   8   3   2 412.533 183.148   4 
   8   3   3 609.364 233.567   4 
   8   4  -7 448.029 203.434   4 
   8   4  -6 55.1856 164.175   4 
   8   4  -5 971.977 283.186   4 
   8   4  -4 3046.91 471.316   4 
   8   4  -3 292.392 177.676   4 
   8   4  -2 254.583 141.611   4 
   8   4  -1 344.933 188.692   4 
   8   4   0 994.120 287.603   4 
   8   4   1 358.548 202.883   4 
   8   5  -6 769.515 273.257   4 
   8   5  -5 1030.11 291.090   4 
   8   5  -4 553.431 229.658   4 
   8   5  -3-412.830 207.416   4 
   8   5  -2 905.545 272.526   4 
   8   5  -1 964.254 272.387   4 
  -9   9   2-188.162 170.748   1 
  -9   9   1 379.520 176.471   1 
  -9   9   0 974.010 259.344   1 
  -9   9  -1 647.905 206.284   1 
  -9   8   4 1961.80 344.693   1 
  -9   8   3 786.429 238.972   1 
  -9   8   2 2714.38 406.108   1 
  -9   8   1 5774.21 582.138   1 
  -9   8   0 4215.75 488.728   1 
  -9   8  -1 1309.24 271.603   1 
   9  -7  -7-54.6901 153.688   4 
   9  -7  -6 456.916 201.886   4 
   9  -7  -5 3197.94 437.811   4 
   9  -7  -4 2471.75 383.631   4 
   9  -7  -3 400.555 167.826   4 
  -9   7   3 660.417 204.146   1 
   9  -7  -2 965.060 226.306   4 
  -9   7   2 1224.67 280.092   1 
   9  -7  -1 2078.45 315.665   4 
  -9   7   1 1686.11 308.843   1 
   9  -7   0 1986.67 294.802   4 
  -9   7   0 2097.13 331.182   1 
  -9   7  -1 259.872 152.366   1 
   9  -6  -8-183.415 192.490   4 
   9  -6  -7 575.462 219.478   4 
   9  -6  -6 596.353 243.937   4 
   9  -6  -5 404.820 194.831   4 
   9  -6  -4 176.515 159.028   4 
   9  -6  -3-99.2504 124.367   4 
   9  -6  -2 1183.92 259.303   4 
  -9   6   2 896.236 219.668   1 
   9  -6  -1 872.253 220.956   4 
  -9   6   1 504.154 164.254   1 
   9  -6   0 262.074 165.777   4 
  -9   6   0-21.5106 81.8246   1 
   9  -6   1 114.269 123.383   4 
   9  -6   2 127.826 115.098   4 
   9  -6   3 737.501 188.903   4 
   9  -6   4 121.240 111.718   4 
   9  -6   5 38.4282 119.775   4 
   9  -5  -8 479.867 229.632   4 
   9  -5  -7 2081.14 402.895   4 
   9  -5  -6-46.4595 151.053   4 
   9  -5  -5 408.983 220.406   4 
   9  -5  -4 319.883 180.355   4 
   9  -5  -3 1165.71 280.190   4 
   9  -5  -2-90.2682 123.461   4 
   9  -5  -1 1545.31 296.583   4 
   9  -5   0 4058.40 455.294   4 
   9  -5   1 359.577 172.061   4 
   9  -5   2-151.301 148.129   4 
   9  -5   3 558.494 183.184   4 
   9  -5   4 2802.03 366.540   4 
   9  -5   5 836.082 226.585   4 
   9  -5   6 148.892 109.869   4 
   9  -4  -8-375.670 242.188   4 
   9  -4  -7-122.322 188.933   4 
   9  -4  -6-150.149 145.771   4 
   9  -4  -5 791.647 251.141   4 
   9  -4  -4 312.945 200.601   4 
   9  -4  -3-5.96629 149.636   4 
   9  -4  -2 219.138 172.758   4 
   9  -4  -1 2.02963 145.719   4 
   9  -4   0-31.0966 126.234   4 
   9  -4   1 747.977 232.299   4 
   9  -4   2 2431.09 355.768   4 
   9  -4   3 2751.23 368.336   4 
   9  -4   4 1611.72 302.608   4 
   9  -4   5 291.573 162.470   4 
   9  -4   6 534.211 196.070   4 
   9  -3  -8 379.461 232.975   4 
   9  -3  -7-179.314 200.678   4 
   9  -3  -6 105.815 146.352   4 
   9  -3  -5 202.612 184.124   4 
   9  -3  -4 564.571 218.131   4 
   9  -3  -3 2404.23 395.527   4 
   9  -3  -2 3391.64 463.596   4 
   9  -3  -1 3029.78 419.861   4 
   9  -3   0 3463.22 442.233   4 
   9  -3   1 1323.31 294.659   4 
   9  -3   2 1940.09 346.626   4 
   9  -3   3 1315.93 281.283   4 
   9  -3   4 163.301 151.421   4 
   9  -3   5 206.328 153.236   4 
   9  -2  -7-513.217 244.083   4 
   9  -2  -6 661.217 255.177   4 
   9  -2  -5 1613.41 362.241   4 
   9  -2  -4 1413.09 313.499   4 
   9  -2  -3-91.2187 169.647   4 
   9  -2  -2 11.4181 150.022   4 
   9  -2  -1-70.9317 129.151   4 
   9  -2   0 136.014 117.670   4 
   9  -2   1 247.413 176.305   4 
   9  -2   2 60.9694 125.193   4 
   9  -2   3-76.0258 128.170   4 
   9  -2   4 442.834 205.267   4 
   9  -1  -7 689.469 265.189   4 
   9  -1  -6 1895.04 392.376   4 
   9  -1  -5 1648.00 375.214   4 
   9  -1  -4 2585.93 422.420   4 
   9  -1  -3 962.053 279.374   4 
   9  -1  -2-126.650 171.465   4 
   9  -1  -1 291.635 190.927   4 
   9  -1   0 549.102 211.109   4 
   9  -1   1-103.534 164.637   4 
   9  -1   2-20.2135 142.342   4 
   9  -1   3-254.925 168.577   4 
   9   0  -6 224.922 197.985   4 
   9   0  -5 1264.20 322.954   4 
   9   0  -4 552.095 258.872   4 
   9   0  -3 200.692 187.966   4 
   9   0  -2 419.179 199.391   4 
   9   0  -1 506.761 236.435   4 
   9   0   0 718.852 259.064   4 
   9   0   1 887.736 249.160   4 
   9   0   2 324.188 220.358   4 
   9   1  -6 88.1228 158.008   4 
   9   1  -5-47.7123 193.737   4 
   9   1  -4 390.813 207.724   4 
   9   1  -3 96.3360 172.319   4 
   9   1  -2 1106.43 307.240   4 
   9   1  -1 1042.73 283.468   4 
   9   1   0 1038.46 279.441   4 
   9   1   1 145.491 137.263   4 
   9   2  -4-168.394 175.942   4 
   9   2  -3 131.196 145.031   4 
   9   2  -2 115.287 139.543   4 
   9   2  -1-118.101 176.036   4 
  10  -6  -4 453.607 190.020   4 
  10  -6  -3 239.844 151.793   4 
  10  -6  -2 1064.90 258.533   4 
  10  -6  -1 571.904 218.719   4 
  10  -6   0 1192.77 266.990   4 
  10  -5  -4 2887.17 452.496   4 
  10  -5  -3 1532.60 329.211   4 
  10  -5  -2 1459.81 316.944   4 
  10  -5  -1 882.932 245.617   4 
  10  -5   0 2673.92 400.203   4 
  10  -5   1 1245.11 277.155   4 
  10  -5   2 47.7574 116.972   4 
  10  -4  -4 36.6240 140.354   4 
  10  -4  -3 42.8540 140.222   4 
  10  -4  -2 220.161 180.258   4 
  10  -4  -1 127.019 134.054   4 
  10  -4   0 886.728 249.004   4 
  10  -4   1-67.2592 175.244   4 
  10  -4   2-39.8512 174.613   4 
  10  -3  -3 1146.93 338.575   4 
  10  -3  -2 443.533 217.786   4 
  10  -3  -1-213.489 176.574   4 
  10  -3   0 189.261 201.188   4 
   0   0   0    0.00    0.00   0 
TITL LJ-327160613 in P-1 
REM P-1 (#2 in standard setting) 
CELL 0.71073   7.622955  10.771910  11.869963  97.7801  97.5920 100.1228 
ZERR   18.00   0.000615   0.000651   0.000897   0.0056   0.0064   0.0058 
LATT  1 
SFAC C H O S 
UNIT 18.00 18.00 18.00 18.00 
TREF 
HKLF 4 
END 
; 
_shelx_hkl_checksum   90469 
  
